# Supplementary material for: An Efficient Iterative Method for Looped Pipe Network Hydraulics
Source: Preprints.org preprint supplement (doi:10.20944/preprints201903.0067.v1), 2019-03-05
Supplement: Supplementary file 1 [file supplementary]

## Sheet: iteration 1
	Pipe	D (m)	L (m)	Q (m³/s)	sign (Q)	Re	e/D	1/λ½	λ	R	R·Q²	2·R·Q
Loop I	1	0.4064	100	0.0555556	1	195566	4.92126e-05	7.88261	0.0160938	117674	363.192	13074.9		Inputs
	2	0.3048	100	-0.0694444	-1	325944	6.56168e-05	8.18551	0.0149248	459858	-2217.68	63869.1
	3	0.1524	100	-0.566667	-1	5.3194e+06	0.000131234	8.80411	0.0129012	1.27202e+07	-4.0846e+06	1.44162e+07		dynamic water viscosity
	4	0.3048	100	0.638889	1	2.99868e+06	6.56168e-05	9.18944	0.0118419	364869	148932	466222		0.00089 Pa·s
										Σ	-3.93753e+06
Loop II	5	0.1524	100	0.0777778	1	730114	0.000131234	8.38371	0.0142275	1.40279e+07	84860.2	2.18212e+06		water density
	6	0.3048	200	-0.0138889	-1	65188.7	6.56168e-05	7.07479	0.019979	1.23117e+06	-237.495	34199.2		1000 kg/m3
	11	0.1524	100	-0.0555556	-1	521510	0.000131234	8.24796	0.0146996	1.44935e+07	-44732.9	1.61038e+06
	12	0.1524	100	-0.0833333	-1	782265	0.000131234	8.40894	0.0141422	1.39439e+07	-96832.4	2.32398e+06		absolute pipe roughness
	2	0.3048	100	0.0694444	1	325944	6.56168e-05	8.18551	0.0149248	459858	2217.68	63869.1		0.00002 m
										Σ	-54724.9
Loop III	7	0.1524	100	0.00833333	1	78226.5	0.000131234	7.15351	0.0195416	1.92676e+07	1338.02	321126
	8	0.1524	100	-0.0388889	-1	365057	0.000131234	8.08159	0.0153111	1.50964e+07	-22830.9	1.17416e+06
	9	0.3048	100	0.113889	1	534548	6.56168e-05	8.47988	0.0139066	428486	5557.75	97599.5
	10	0.1524	100	0.0361111	1	338981	0.000131234	8.04426	0.0154536	1.52368e+07	19869	1.10044e+06
	6	0.3048	200	0.0138889	1	65188.7	6.56168e-05	7.07479	0.019979	1.23117e+06	237.495	34199.2
										Σ	4171.33
Loop IV	3	0.1524	100	0.566667	1	5.3194e+06	0.000131234	8.80411	0.0129012	1.27202e+07	4.0846e+06	1.44162e+07
	12	0.1524	100	0.0833333	1	782265	0.000131234	8.40894	0.0141422	1.39439e+07	96832.4	2.32398e+06
	13	0.1524	100	-0.0277778	-1	260755	0.000131234	7.90498	0.0160029	1.57785e+07	-12174.7	876581
	14	0.4064	100	-0.722222	-1	2.54236e+06	4.92126e-05	9.29645	0.0115709	84603.3	-44129.5	122205
										Σ	4.12513e+06
Loop V	15	0.1524	200	0.388889	1	3.65057e+06	0.000131234	8.76402	0.0130195	2.56737e+07	3.88275e+06	1.99684e+07
	9	0.3048	100	0.113889	1	534548	6.56168e-05	8.47988	0.0139066	428486	5557.75	97599.5
	10	0.1524	100	0.0361111	1	338981	0.000131234	8.04426	0.0154536	1.52368e+07	19869	1.10044e+06
	11	0.1524	100	-0.0555556	-1	521510	0.000131234	8.24796	0.0146996	1.44935e+07	-44732.9	1.61038e+06		changed sign (oposite than in previous iteration)
	12	0.1524	100	-0.0833333	-1	782265	0.000131234	8.40894	0.0141422	1.39439e+07	-96832.4	2.32398e+06		stoping criterion (stop when result is 0.00)
										Σ	3.76661e+06
	Pipe 1	Pipe 2	Pipe 3	Pipe 4	Pipe 5	Pipe 6	Pipe 7	Pipe 8	Pipe 9	Pipe 10	Pipe 11	Pipe 12	Pipe 13	Pipe 14	Pipe 15
Node 1	0	0	-1	-1	0	0	0	0	0	0	0	0	0	-1	0	Node equations			Node 1 - input-consumption	-1.92778	[V]
Node 2	-1	0	0	1	0	0	0	0	0	0	0	0	0	0	0				Node 2 - consumption	0.583333
Node 3	1	1	0	0	-1	0	0	0	0	0	0	0	0	0	0				Node 3 - consumption	0.0472222
Node 4	0	-1	1	0	0	0	0	0	0	0	0	-1	0	0	-1				Node 4 - consumption	0.025
Node 5	0	0	0	0	0	0	0	0	0	0	-1	1	1	0	0				Node 5 - consumption	0.0555556
Node 6	0	0	0	0	0	0	0	0	0	0	0	0	-1	1	0				Node 6 - consumption	0.694444
Node 7	0	0	0	0	1	1	-1	0	0	0	0	0	0	0	0				Node 7 - consumption	0.0833333
Node 8	0	0	0	0	0	0	1	1	0	0	0	0	0	0	0				Node 8 - consumption	0.0472222
Node 9	0	0	0	0	0	0	0	-1	-1	0	0	0	0	0	1				Node 9 - consumption	0.236111
Node 10	0	0	0	0	0	0	0	0	1	-1	0	0	0	0	0				Node 10 - consumption	0.0777778
Loop 1	13074.9	-63869.1	-1.44162e+07	466222	0	0	0	0	0	0	0	0	0	0	0	Loop equations			-A₁+(A₂·A₃+A₄·A₅+A₆·A₇+A₈·A₉)	-3.93753e+06
Loop 2	0	63869.1	0	0	2.18212e+06	-34199.2	0	0	0	0	-1.61038e+06	-2.32398e+06	0	0	0				-B₁+(B₂·B₃+B₄·B₅+B₆·B₇+B₈·B₉+B10·B11)	-54724.9
Loop 3	0	0	0	0	0	34199.2	321126	-1.17416e+06	97599.5	1.10044e+06	0	0	0	0	0				-C₁+(C₂·C₃+C₄·C₅+C₆·C₇+C₈·C₉+C10·C11)	4171.33
Loop 4	0	0	1.44162e+07	0	0	0	0	0	0	0	0	2.32398e+06	-876581	-122205	0				-D₁+(D₂·D₃+D₄·D₅+D₆·D₇+D₈·D₉)	4.12513e+06
Loop 5	0	0	0	0	0	0	0	0	97599.5	1.10044e+06	-1.61038e+06	-2.32398e+06	0	0	1.99684e+07				-E₁+(E₂·E₃+E₄·E₅+E₆·E₇+E₈·E₉+E10·E11)	3.76661e+06
inv [NL]	-0.546238	-0.727144	0.267783	0.250713	-0.213897	-0.505575	0.00425942	0.00547409	0.0099154	0.00910763	3.88026e-07	1.20765e-07	-3.78253e-09	3.32744e-07	1.20589e-08
	0.100279	0.224882	0.228376	-0.747956	-0.10789	0.0748089	0.00294331	-0.00259464	-0.0228435	-0.0209826	-2.67261e-07	1.03309e-07	1.72454e-08	-2.08422e-07	-3.63129e-08		final results	[Q]=inv[NL]x[V]
	-0.018605	0.00716839	0.00789119	0.0116492	-0.00663346	-0.0171403	0.000128573	0.000193492	0.000430862	0.000395761	-5.52814e-08	3.55737e-09	-2.02161e-10	1.19861e-08	5.61802e-10		result [Q]	Q (m3/s)	Q (m3/h)	sign	Pipe	velocity (m/s)
	-0.546238	0.272856	0.267783	0.250713	-0.213897	-0.505575	0.00425942	0.00547409	0.0099154	0.00910763	3.88026e-07	1.20765e-07	-3.78253e-09	3.32744e-07	1.20589e-08			0.172006	619.222	1	1	1.32601
	-0.445959	-0.502262	-0.503841	-0.497243	-0.321787	-0.430766	0.00720274	0.00287946	-0.0129281	-0.0118749	1.20765e-07	2.24074e-07	1.34629e-08	1.24322e-07	-2.4254e-08			0.0192246	69.2087	1	2	0.263474
	0.461133	0.519199	0.520828	0.515331	0.332981	0.445453	0.980407	0.864061	0.438655	0.40292	-1.24547e-07	-2.10611e-07	3.62306e-07	-1.28307e-07	3.83984e-09			0.29763	1071.47	1	3	16.3161
	0.0151741	0.0169376	0.016987	0.0180885	0.0111942	0.0146871	-0.0123906	0.86694	0.425727	0.391045	-3.78253e-09	1.34629e-08	3.75769e-07	-3.98469e-09	-2.04142e-08			0.75534	2719.22	1	4	10.352
	-0.0151741	-0.0169376	-0.016987	-0.0180885	-0.0111942	-0.0146871	0.0123906	0.13306	-0.425727	-0.391045	3.78253e-09	-1.34629e-08	-3.75769e-07	3.98469e-09	2.04142e-08			0.144009	518.431	1	5	7.89458
	-0.0321025	-0.0359612	-0.0360694	-0.0372872	-0.023477	-0.0310472	-0.0125219	-0.126635	-0.543879	0.418962	8.27638e-09	-1.07911e-08	3.55355e-07	8.63603e-09	2.53696e-08			0.0252631	90.9472	1	6	0.346232
	-0.0321025	-0.0359612	-0.0360694	-0.0372872	-0.023477	-0.0310472	-0.0125219	-0.126635	-0.543879	-0.581038	8.27638e-09	-1.07911e-08	3.55355e-07	8.63603e-09	2.53696e-08			0.0859384	309.378	1	7	4.71116
	-0.506765	-0.444839	-0.443103	-0.447382	-0.643542	-0.5235	-0.00707142	-0.00930365	-0.0174656	-0.0160427	-1.32824e-07	-1.9982e-07	6.95127e-09	-1.36943e-07	-2.15298e-08		change sing	-0.0387162	-139.378	-1	8	-2.12243
	-0.0716075	-0.164815	-0.167429	-0.185019	0.135928	-0.0462149	-0.00268342	-0.00363607	-0.00711931	-0.00653933	1.9992e-07	-7.54979e-08	2.96658e-09	2.07787e-07	-8.90907e-09			0.0132222	47.5999	1	9	0.181211
	-0.435157	-0.280025	-0.275674	-0.262362	0.220531	-0.477285	-0.004388	-0.00566759	-0.0103463	-0.00950339	-3.32744e-07	-1.24322e-07	3.98469e-09	-3.4473e-07	-1.26207e-08		change sing	-0.0645556	-232.4	-1	10	-3.53895
	-0.435157	-0.280025	-0.275674	-0.262362	0.220531	0.522715	-0.004388	-0.00566759	-0.0103463	-0.00950339	-3.32744e-07	-1.24322e-07	3.98469e-09	-3.4473e-07	-1.26207e-08			0.167596	603.347	1	11	9.18766
	-0.0472766	-0.0528988	-0.0530564	-0.0553757	-0.0346712	-0.0457343	-0.00013132	0.0064242	0.0303937	0.0279176	1.20589e-08	-2.4254e-08	-2.04142e-08	1.26207e-08	4.57838e-08			0.0427879	154.036	1	12	2.34564
																		0.180364	649.311	1	13	9.88759
																		0.874809	3149.31	1	14	6.74397
																		0.210617	758.222	1	15	11.5461

## Sheet: iteration 2
	Pipe	D (m)	L (m)	Q (m³/s)	sign (Q)	Re	e/D	1/λ½	λ	R	R·Q²	2·R·Q
Loop I	1	0.4064	100	0.172006	1	605495	4.92126e-05	8.61908	0.013461	98423.8	2911.98	33859		Inputs
	2	0.3048	100	-0.0192246	-1	90232.6	6.56168e-05	7.31082	0.0187097	576478	-213.059	22165.2
	3	0.1524	100	-0.29763	-1	2.7939e+06	0.000131234	8.72685	0.0131306	1.29464e+07	-1.14684e+06	7.70649e+06		dynamic water viscosity
	4	0.3048	100	0.75534	1	3.54525e+06	6.56168e-05	9.2299	0.0117383	361678	206351	546379		0.00089 Pa·s
										Σ	-937790
Loop II	5	0.1524	100	0.144009	1	1.35184e+06	0.000131234	8.57814	0.0135898	1.33992e+07	277879	3.8592e+06		water density
	6	0.3048	200	-0.0252631	-1	118575	6.56168e-05	7.50592	0.0177498	1.0938e+06	-698.089	55265.5		1000 kg/m3
	11	0.1524	100	-0.167596	-1	1.57326e+06	0.000131234	8.61582	0.0134712	1.32823e+07	-373080	4.45212e+06
	12	0.1524	100	-0.0427879	-1	401658	0.000131234	8.12835	0.0151355	1.49232e+07	-27321.4	1.27706e+06		absolute pipe roughness
	2	0.3048	100	0.0192246	1	90232.6	6.56168e-05	7.31082	0.0187097	576478	213.059	22165.2		0.00002 m
										Σ	-123007
Loop III	7	0.1524	100	0.0859384	1	806719	0.000131234	8.41991	0.0141054	1.39075e+07	102713	2.39039e+06
	8	0.1524	100	0.0387162	1	363436	0.000131234	8.07937	0.0153195	1.51046e+07	22641	1.16959e+06
	9	0.3048	100	0.0132222	1	62059.6	6.56168e-05	7.03879	0.0201839	621899	108.725	16445.8
	10	0.1524	100	-0.0645556	-1	605995	0.000131234	8.31113	0.014477	1.4274e+07	-59485.7	1.84293e+06
	6	0.3048	200	0.0252631	1	118575	6.56168e-05	7.50592	0.0177498	1.0938e+06	698.089	55265.5
										Σ	66675.2
Loop IV	3	0.1524	100	0.29763	1	2.7939e+06	0.000131234	8.72685	0.0131306	1.29464e+07	1.14684e+06	7.70649e+06
	12	0.1524	100	0.0427879	1	401658	0.000131234	8.12835	0.0151355	1.49232e+07	27321.4	1.27706e+06
	13	0.1524	100	-0.180364	-1	1.69311e+06	0.000131234	8.63271	0.0134185	1.32303e+07	-430399	4.77256e+06
	14	0.4064	100	-0.874809	-1	3.07949e+06	4.92126e-05	9.35852	0.0114179	83484.8	-63890.1	146066
										Σ	679872
Loop V	15	0.1524	200	0.210617	1	1.9771e+06	0.000131234	8.66566	0.0133167	2.62599e+07	1.16488e+06	1.10616e+07
	9	0.3048	100	0.0132222	1	62059.6	6.56168e-05	7.03879	0.0201839	621899	108.725	16445.8
	10	0.1524	100	-0.0645556	-1	605995	0.000131234	8.31113	0.014477	1.4274e+07	-59485.7	1.84293e+06
	11	0.1524	100	-0.167596	-1	1.57326e+06	0.000131234	8.61582	0.0134712	1.32823e+07	-373080	4.45212e+06		changed sign (oposite than in previous iteration)
	12	0.1524	100	-0.0427879	-1	401658	0.000131234	8.12835	0.0151355	1.49232e+07	-27321.4	1.27706e+06		stoping criterion (stop when result is 0.00)
										Σ	705098
	Pipe 1	Pipe 2	Pipe 3	Pipe 4	Pipe 5	Pipe 6	Pipe 7	Pipe 8	Pipe 9	Pipe 10	Pipe 11	Pipe 12	Pipe 13	Pipe 14	Pipe 15
Node 1	0	0	-1	-1	0	0	0	0	0	0	0	0	0	-1	0	Node equations			Node 1 - input-consumption	-1.92778	[V]
Node 2	-1	0	0	1	0	0	0	0	0	0	0	0	0	0	0				Node 2 - consumption	0.583333
Node 3	1	1	0	0	-1	0	0	0	0	0	0	0	0	0	0				Node 3 - consumption	0.0472222
Node 4	0	-1	1	0	0	0	0	0	0	0	0	-1	0	0	-1				Node 4 - consumption	0.025
Node 5	0	0	0	0	0	0	0	0	0	0	-1	1	1	0	0				Node 5 - consumption	0.0555556
Node 6	0	0	0	0	0	0	0	0	0	0	0	0	-1	1	0				Node 6 - consumption	0.694444
Node 7	0	0	0	0	1	1	-1	0	0	0	0	0	0	0	0				Node 7 - consumption	0.0833333
Node 8	0	0	0	0	0	0	1	-1	0	0	0	0	0	0	0				Node 8 - consumption	0.0472222
Node 9	0	0	0	0	0	0	0	1	-1	0	0	0	0	0	1				Node 9 - consumption	0.236111
Node 10	0	0	0	0	0	0	0	0	1	1	0	0	0	0	0				Node 10 - consumption	0.0777778
Loop 1	33859	-22165.2	-7.70649e+06	546379	0	0	0	0	0	0	0	0	0	0	0	Loop equations			-A₁+(A₂·A₃+A₄·A₅+A₆·A₇+A₈·A₉)	-937790
Loop 2	0	22165.2	0	0	3.8592e+06	-55265.5	0	0	0	0	-4.45212e+06	-1.27706e+06	0	0	0				-B₁+(B₂·B₃+B₄·B₅+B₆·B₇+B₈·B₉+B10·B11)	-123007
Loop 3	0	0	0	0	0	55265.5	2.39039e+06	1.16959e+06	16445.8	-1.84293e+06	0	0	0	0	0				-C₁+(C₂·C₃+C₄·C₅+C₆·C₇+C₈·C₉+C10·C11)	66675.2
Loop 4	0	0	7.70649e+06	0	0	0	0	0	0	0	0	1.27706e+06	-4.77256e+06	-146066	0				-D₁+(D₂·D₃+D₄·D₅+D₆·D₇+D₈·D₉)	679872
Loop 5	0	0	0	0	0	0	0	0	16445.8	-1.84293e+06	-4.45212e+06	-1.27706e+06	0	0	1.10616e+07				-E₁+(E₂·E₃+E₄·E₅+E₆·E₇+E₈·E₉+E10·E11)	705098
inv [NL]	-0.789736	-0.927163	0.0643211	0.0591099	-0.0943663	-0.769086	0.00098762	0.00447616	0.00618307	0.00612838	2.51522e-07	1.6411e-08	-1.45941e-09	1.41375e-07	4.78475e-09
	0.30597	0.43443	0.44239	-0.549888	-0.304205	0.28785	0.00535229	-0.0338474	-0.0530273	-0.0525583	-2.35111e-07	1.13246e-07	1.63989e-08	-1.24054e-07	-4.49178e-08		final results	[Q]=inv[NL]x[V]
	-0.0603409	-0.000158984	0.00357048	0.00603208	-0.0062301	-0.058734	5.89659e-05	0.000434371	0.000618052	0.000612585	-1.10147e-07	9.09908e-10	-1.57048e-10	1.10012e-08	4.89445e-10		result [Q]	Q (m3/s)	Q (m3/h)	sign	Pipe	velocity (m/s)
	-0.789736	0.0728374	0.0643211	0.0591099	-0.0943663	-0.769086	0.00098762	0.00447616	0.00618307	0.00612838	2.51522e-07	1.6411e-08	-1.45941e-09	1.41375e-07	4.78475e-09			0.310506	1117.82	1	1	2.39372
	-0.483766	-0.492733	-0.493288	-0.490778	-0.398571	-0.481236	0.00633991	-0.0293712	-0.0468443	-0.04643	1.6411e-08	1.29657e-07	1.49395e-08	1.7321e-08	-4.01331e-08		change sing	-0.072411	-260.68	-1	2	-0.992395
	0.530851	0.540615	0.54122	0.539073	0.437705	0.528085	0.983937	0.563392	0.357624	0.354461	-1.78704e-08	-1.14717e-07	1.75932e-07	-1.89374e-08	1.64036e-08			0.186633	671.878	1	3	10.2312
	0.0470847	0.0478821	0.0479315	0.048295	0.039134	0.0468486	-0.00972297	0.534021	0.31078	0.308031	-1.45941e-09	1.49395e-08	1.90871e-07	-1.61645e-09	-2.37294e-08			0.89384	3217.82	1	4	12.2501
	0.0470847	0.0478821	0.0479315	0.048295	0.039134	0.0468486	-0.00972297	-0.465979	0.31078	0.308031	-1.45941e-09	1.49395e-08	1.90871e-07	-1.61645e-09	-2.37294e-08			0.190873	687.143	1	5	10.4637
	-0.105927	-0.107744	-0.107857	-0.108489	-0.087936	-0.105393	-0.0106295	-0.410163	-0.605651	0.390861	3.32535e-09	-2.51936e-08	1.67142e-07	3.65775e-09	4.4945e-08		change sing	-0.0160281	-57.7013	-1	6	-0.219666
	0.105927	0.107744	0.107857	0.108489	0.087936	0.105393	0.0106295	0.410163	0.605651	0.609139	-3.32535e-09	2.51936e-08	-1.67142e-07	-3.65775e-09	-4.4945e-08			0.0915117	329.442	1	7	5.01668
	-0.363222	-0.351641	-0.350923	-0.352438	-0.474359	-0.366522	-0.00543336	-0.0264448	-0.0367254	-0.0364006	-2.11958e-08	-8.95237e-08	8.78996e-09	-2.25952e-08	-2.85414e-08			0.0442894	159.442	1	8	2.42795
	-0.213299	-0.278963	-0.283032	-0.287296	0.425044	-0.194343	-0.00438677	-0.0215342	-0.0299243	-0.0296596	1.20179e-07	-7.22028e-08	7.17351e-09	1.29781e-07	-2.32672e-08		change sing	-0.03208	-115.488	-1	9	-0.439657
	-0.149923	-0.0726784	-0.0678916	-0.0651419	0.100596	-0.17218	-0.00104659	-0.00491053	-0.00680112	-0.00674096	-1.41375e-07	-1.7321e-08	1.61645e-09	-1.52376e-07	-5.2742e-09			0.109858	395.488	1	10	6.02242
	-0.149923	-0.0726784	-0.0678916	-0.0651419	0.100596	0.82782	-0.00104659	-0.00491053	-0.00680112	-0.00674096	-1.41375e-07	-1.7321e-08	1.61645e-09	-1.52376e-07	-5.2742e-09			0.171607	617.787	1	11	9.40754
	-0.153012	-0.155626	-0.155788	-0.156784	-0.12707	-0.152241	-0.000906554	0.055816	0.0835697	0.0828305	4.78475e-09	-4.01331e-08	-2.37294e-08	5.2742e-09	6.86745e-08			0.0743021	267.488	1	12	4.07325
																		0.152861	550.299	1	13	8.37985
																		0.847305	3050.3	1	14	6.53195
																		0.159742	575.07	1	15	8.75706

## Sheet: iteration 3
	Pipe	D (m)	L (m)	Q (m³/s)	sign (Q)	Re	e/D	1/λ½	λ	R	R·Q²	2·R·Q
Loop I	1	0.4064	100	0.310506	1	1.09304e+06	4.92126e-05	8.94132	0.0125083	91457.4	8817.79	56796.2		Inputs
	2	0.3048	100	0.072411	1	339868	6.56168e-05	8.2116	0.0148301	456940	2395.9	66175
	3	0.1524	100	-0.186633	-1	1.75196e+06	0.000131234	8.64028	0.013395	1.32072e+07	-460029	4.92978e+06		dynamic water viscosity
	4	0.3048	100	0.89384	1	4.19532e+06	6.56168e-05	9.26611	0.0116468	358857	286708	641520		0.00089 Pa·s
										Σ	-162107
Loop II	5	0.1524	100	0.190873	1	1.79176e+06	0.000131234	8.64517	0.0133799	1.31922e+07	480627	5.03609e+06		water density
	6	0.3048	200	0.0160281	1	75229.5	6.56168e-05	7.17923	0.0194019	1.19561e+06	307.153	38326.8		1000 kg/m3
	11	0.1524	100	-0.171607	-1	1.61091e+06	0.000131234	8.62135	0.0134539	1.32652e+07	-390649	4.55282e+06
	12	0.1524	100	-0.0743021	-1	697487	0.000131234	8.3665	0.014286	1.40857e+07	-77764.2	2.09319e+06		absolute pipe roughness
	2	0.3048	100	-0.072411	-1	339868	6.56168e-05	8.2116	0.0148301	456940	-2395.9	66175		0.00002 m
										Σ	10125.2
Loop III	7	0.1524	100	0.0915117	1	859036	0.000131234	8.44176	0.0140325	1.38357e+07	115865	2.53225e+06
	8	0.1524	100	0.0442894	1	415753	0.000131234	8.14484	0.0150742	1.48628e+07	29154.2	1.31653e+06
	9	0.3048	100	-0.03208	-1	150570	6.56168e-05	7.67338	0.0169835	523289	-538.53	33574.2
	10	0.1524	100	-0.109858	-1	1.03125e+06	0.000131234	8.50115	0.0138371	1.3643e+07	-164654	2.99758e+06
	6	0.3048	200	-0.0160281	-1	75229.5	6.56168e-05	7.17923	0.0194019	1.19561e+06	-307.153	38326.8
										Σ	-20480.1
Loop IV	3	0.1524	100	0.186633	1	1.75196e+06	0.000131234	8.64028	0.013395	1.32072e+07	460029	4.92978e+06
	12	0.1524	100	0.0743021	1	697487	0.000131234	8.3665	0.014286	1.40857e+07	77764.2	2.09319e+06
	13	0.1524	100	-0.152861	-1	1.43493e+06	0.000131234	8.59341	0.0135416	1.33516e+07	-311980	4.08188e+06
	14	0.4064	100	-0.847305	-1	2.98268e+06	4.92126e-05	9.34865	0.011442	83661.2	-60062.6	141773
										Σ	165751
Loop V	15	0.1524	200	0.159742	1	1.49952e+06	0.000131234	8.6043	0.0135073	2.66357e+07	679674	8.50966e+06
	9	0.3048	100	-0.03208	-1	150570	6.56168e-05	7.67338	0.0169835	523289	-538.53	33574.2
	10	0.1524	100	-0.109858	-1	1.03125e+06	0.000131234	8.50115	0.0138371	1.3643e+07	-164654	2.99758e+06
	11	0.1524	100	-0.171607	-1	1.61091e+06	0.000131234	8.62135	0.0134539	1.32652e+07	-390649	4.55282e+06		changed sign (oposite than in previous iteration)
	12	0.1524	100	-0.0743021	-1	697487	0.000131234	8.3665	0.014286	1.40857e+07	-77764.2	2.09319e+06		stoping criterion (stop when result is 0.00)
										Σ	46068.3
	Pipe 1	Pipe 2	Pipe 3	Pipe 4	Pipe 5	Pipe 6	Pipe 7	Pipe 8	Pipe 9	Pipe 10	Pipe 11	Pipe 12	Pipe 13	Pipe 14	Pipe 15
Node 1	0	0	-1	-1	0	0	0	0	0	0	0	0	0	-1	0	Node equations			Node 1 - input-consumption	-1.92778	[V]
Node 2	-1	0	0	1	0	0	0	0	0	0	0	0	0	0	0				Node 2 - consumption	0.583333
Node 3	1	-1	0	0	-1	0	0	0	0	0	0	0	0	0	0				Node 3 - consumption	0.0472222
Node 4	0	1	1	0	0	0	0	0	0	0	0	-1	0	0	-1				Node 4 - consumption	0.025
Node 5	0	0	0	0	0	0	0	0	0	0	-1	1	1	0	0				Node 5 - consumption	0.0555556
Node 6	0	0	0	0	0	0	0	0	0	0	0	0	-1	1	0				Node 6 - consumption	0.694444
Node 7	0	0	0	0	1	-1	-1	0	0	0	0	0	0	0	0				Node 7 - consumption	0.0833333
Node 8	0	0	0	0	0	0	1	-1	0	0	0	0	0	0	0				Node 8 - consumption	0.0472222
Node 9	0	0	0	0	0	0	0	1	1	0	0	0	0	0	1				Node 9 - consumption	0.236111
Node 10	0	0	0	0	0	0	0	0	-1	1	0	0	0	0	0				Node 10 - consumption	0.0777778
Loop 1	56796.2	66175	-4.92978e+06	641520	0	0	0	0	0	0	0	0	0	0	0	Loop equations			-A₁+(A₂·A₃+A₄·A₅+A₆·A₇+A₈·A₉)	-162107
Loop 2	0	-66175	0	0	5.03609e+06	38326.8	0	0	0	0	-4.55282e+06	-2.09319e+06	0	0	0				-B₁+(B₂·B₃+B₄·B₅+B₆·B₇+B₈·B₉+B10·B11)	10125.2
Loop 3	0	0	0	0	0	-38326.8	2.53225e+06	1.31653e+06	-33574.2	-2.99758e+06	0	0	0	0	0				-C₁+(C₂·C₃+C₄·C₅+C₆·C₇+C₈·C₉+C10·C11)	-20480.1
Loop 4	0	0	4.92978e+06	0	0	0	0	0	0	0	0	2.09319e+06	-4.08188e+06	-141773	0				-D₁+(D₂·D₃+D₄·D₅+D₆·D₇+D₈·D₉)	165751
Loop 5	0	0	0	0	0	0	0	0	-33574.2	-2.99758e+06	-4.55282e+06	-2.09319e+06	0	0	8.50966e+06				-E₁+(E₂·E₃+E₄·E₅+E₆·E₇+E₈·E₉+E10·E11)	46068.3
inv [NL]	-0.692788	-0.879406	0.104072	0.0861773	-0.131516	-0.673948	0.000921802	0.00995908	0.0146576	0.0144953	2.909e-07	2.04822e-08	-3.56888e-09	1.32888e-07	8.40453e-09
	-0.277052	-0.45053	-0.465889	0.510129	0.19067	-0.261352	-0.00266448	0.0542122	0.0837827	0.0828547	2.70418e-07	-9.1981e-08	-2.24609e-08	1.10739e-07	5.01015e-08		final results	[Q]=inv[NL]x[V]
	-0.101854	-0.000486255	0.00848823	0.019055	-0.0160702	-0.0989748	9.4809e-05	0.00213845	0.00320095	0.0031655	-1.58012e-07	1.66665e-09	-8.07046e-10	2.03104e-08	1.86306e-09		result [Q]	Q (m3/s)	Q (m3/h)	sign	Pipe	velocity (m/s)
	-0.692788	0.120594	0.104072	0.0861773	-0.131516	-0.673948	0.000921802	0.00995908	0.0146576	0.0144953	2.909e-07	2.04822e-08	-3.56888e-09	1.32888e-07	8.40453e-09			0.334969	1205.89	1	1	2.58231
	-0.415736	-0.428875	-0.430039	-0.423952	-0.322186	-0.412595	0.00358628	-0.0442531	-0.0691251	-0.0683594	2.04822e-08	1.12463e-07	1.88921e-08	2.21489e-08	-4.16969e-08			0.0960558	345.801	1	2	1.31645
	-0.502995	-0.518424	-0.51979	-0.51519	-0.390963	-0.499234	-0.991023	-0.634853	-0.449678	-0.444697	2.40511e-08	9.35712e-08	-1.40654e-07	2.65248e-08	-7.69846e-09			0.157532	567.116	1	3	8.63594
	0.0872592	0.0895487	0.0897514	0.0912377	0.0687768	0.0866388	-0.0053908	0.5906	0.380553	0.376338	-3.56888e-09	1.88921e-08	1.59546e-07	-4.37592e-09	-3.39985e-08			0.918303	3305.89	1	4	12.5854
	0.0872592	0.0895487	0.0897514	0.0912377	0.0687768	0.0866388	-0.0053908	-0.4094	0.380553	0.376338	-3.56888e-09	1.88921e-08	1.59546e-07	-4.37592e-09	-3.39985e-08			0.191691	690.089	1	5	10.5085
	0.117156	0.120259	0.120533	0.122362	0.0922721	0.116321	0.00568586	0.323603	0.488889	-0.505449	-4.83565e-09	2.28049e-08	-1.25547e-07	-5.89167e-09	-4.30719e-08			0.0120571	43.4056	1	6	0.165243
	0.117156	0.120259	0.120533	0.122362	0.0922721	0.116321	0.00568586	0.323603	0.488889	0.494551	-4.83565e-09	2.28049e-08	-1.25547e-07	-5.89167e-09	-4.30719e-08			0.0963009	346.683	1	7	5.27923
	-0.379849	-0.361317	-0.359677	-0.362448	-0.516765	-0.384445	-0.00329122	-0.0415444	-0.0614324	-0.060752	-2.88868e-08	-7.07663e-08	1.51064e-08	-3.24165e-08	-3.53734e-08			0.0490787	176.683	1	8	2.6905
	-0.174491	-0.241209	-0.247116	-0.257216	0.335649	-0.157367	-0.00227461	-0.0294469	-0.0435739	-0.0430912	1.04001e-07	-4.86174e-08	1.07305e-08	1.20782e-07	-2.51058e-08			0.0314548	113.237	1	9	0.431089
	-0.205358	-0.120108	-0.11256	-0.105232	0.147586	-0.227077	-0.00101661	-0.0120975	-0.0178586	-0.0176608	-1.32888e-07	-2.21489e-08	4.37592e-09	-1.53198e-07	-1.02676e-08			0.109233	393.237	1	10	5.98814
	-0.205358	-0.120108	-0.11256	-0.105232	0.147586	0.772923	-0.00101661	-0.0120975	-0.0178586	-0.0176608	-1.32888e-07	-2.21489e-08	4.37592e-09	-1.53198e-07	-1.02676e-08			0.174953	629.832	1	11	9.59096
	-0.204416	-0.209807	-0.210285	-0.2136	-0.161049	-0.20296	-0.000295057	0.0857975	0.130558	0.129111	8.40453e-09	-4.16969e-08	-3.39985e-08	1.02676e-08	7.70703e-08			0.0730104	262.837	1	12	4.00244
																		0.157498	566.994	1	13	8.63409
																		0.851943	3066.99	1	14	6.5677
																		0.155578	560.08	1	15	8.52879

## Sheet: iteration 4
	Pipe	D (m)	L (m)	Q (m³/s)	sign (Q)	Re	e/D	1/λ½	λ	R	R·Q²	2·R·Q
Loop I	1	0.4064	100	0.334969	1	1.17916e+06	4.92126e-05	8.97857	0.0124047	90700.1	10177	60763.5		Inputs
	2	0.3048	100	0.0960558	1	450847	6.56168e-05	8.38222	0.0142325	438528	4046.18	84246.3
	3	0.1524	100	-0.157532	-1	1.47878e+06	0.000131234	8.60089	0.013518	1.33284e+07	-330763	4.19931e+06		dynamic water viscosity
	4	0.3048	100	0.918303	1	4.31014e+06	6.56168e-05	9.27152	0.0116332	358438	302263	658309		0.00089 Pa·s
										Σ	-14276.4
Loop II	5	0.1524	100	0.191691	1	1.79944e+06	0.000131234	8.64609	0.0133771	1.31894e+07	484653	5.0566e+06		water density
	6	0.3048	200	0.0120571	1	56591.1	6.56168e-05	6.9711	0.0205777	1.26807e+06	184.344	30578.5		1000 kg/m3
	11	0.1524	100	-0.174953	-1	1.64232e+06	0.000131234	8.62581	0.01344	1.32515e+07	-405611	4.6368e+06
	12	0.1524	100	-0.0730104	-1	685361	0.000131234	8.3598	0.014309	1.41083e+07	-75204.3	2.0601e+06		absolute pipe roughness
	2	0.3048	100	-0.0960558	-1	450847	6.56168e-05	8.38222	0.0142325	438528	-4046.18	84246.3		0.00002 m
										Σ	-23.9277
Loop III	7	0.1524	100	0.0963009	1	903994	0.000131234	8.45895	0.0139755	1.37795e+07	127789	2.65395e+06
	8	0.1524	100	0.0490787	1	460710	0.000131234	8.1927	0.0148986	1.46896e+07	35383.2	1.4419e+06
	9	0.3048	100	-0.0314548	-1	147636	6.56168e-05	7.65971	0.0170441	525158	-519.593	33037.5
	10	0.1524	100	-0.109233	-1	1.02539e+06	0.000131234	8.49939	0.0138428	1.36487e+07	-162852	2.98176e+06
	6	0.3048	200	-0.0120571	-1	56591.1	6.56168e-05	6.9711	0.0205777	1.26807e+06	-184.344	30578.5
										Σ	-384.321
Loop IV	3	0.1524	100	0.157532	1	1.47878e+06	0.000131234	8.60089	0.013518	1.33284e+07	330763	4.19931e+06
	12	0.1524	100	0.0730104	1	685361	0.000131234	8.3598	0.014309	1.41083e+07	75204.3	2.0601e+06
	13	0.1524	100	-0.157498	-1	1.47847e+06	0.000131234	8.60084	0.0135182	1.33286e+07	-330625	4.19846e+06
	14	0.4064	100	-0.851943	-1	2.999e+06	4.92126e-05	9.35035	0.0114379	83630.8	-60699.8	142497
										Σ	14642.3
Loop V	15	0.1524	200	0.155578	1	1.46044e+06	0.000131234	8.59781	0.0135277	2.66759e+07	645675	8.30036e+06
	9	0.3048	100	-0.0314548	-1	147636	6.56168e-05	7.65971	0.0170441	525158	-519.593	33037.5
	10	0.1524	100	-0.109233	-1	1.02539e+06	0.000131234	8.49939	0.0138428	1.36487e+07	-162852	2.98176e+06
	11	0.1524	100	-0.174953	-1	1.64232e+06	0.000131234	8.62581	0.01344	1.32515e+07	-405611	4.6368e+06		changed sign (oposite than in previous iteration)
	12	0.1524	100	-0.0730104	-1	685361	0.000131234	8.3598	0.014309	1.41083e+07	-75204.3	2.0601e+06		stoping criterion (stop when result is 0.00)
										Σ	1488
	Pipe 1	Pipe 2	Pipe 3	Pipe 4	Pipe 5	Pipe 6	Pipe 7	Pipe 8	Pipe 9	Pipe 10	Pipe 11	Pipe 12	Pipe 13	Pipe 14	Pipe 15
Node 1	0	0	-1	-1	0	0	0	0	0	0	0	0	0	-1	0	Node equations			Node 1 - input-consumption	-1.92778	[V]
Node 2	-1	0	0	1	0	0	0	0	0	0	0	0	0	0	0				Node 2 - consumption	0.583333
Node 3	1	-1	0	0	-1	0	0	0	0	0	0	0	0	0	0				Node 3 - consumption	0.0472222
Node 4	0	1	1	0	0	0	0	0	0	0	0	-1	0	0	-1				Node 4 - consumption	0.025
Node 5	0	0	0	0	0	0	0	0	0	0	-1	1	1	0	0				Node 5 - consumption	0.0555556
Node 6	0	0	0	0	0	0	0	0	0	0	0	0	-1	1	0				Node 6 - consumption	0.694444
Node 7	0	0	0	0	1	-1	-1	0	0	0	0	0	0	0	0				Node 7 - consumption	0.0833333
Node 8	0	0	0	0	0	0	1	-1	0	0	0	0	0	0	0				Node 8 - consumption	0.0472222
Node 9	0	0	0	0	0	0	0	1	1	0	0	0	0	0	1				Node 9 - consumption	0.236111
Node 10	0	0	0	0	0	0	0	0	-1	1	0	0	0	0	0				Node 10 - consumption	0.0777778
Loop 1	60763.5	84246.3	-4.19931e+06	658309	0	0	0	0	0	0	0	0	0	0	0	Loop equations			-A₁+(A₂·A₃+A₄·A₅+A₆·A₇+A₈·A₉)	-14276.4
Loop 2	0	-84246.3	0	0	5.0566e+06	30578.5	0	0	0	0	-4.6368e+06	-2.0601e+06	0	0	0				-B₁+(B₂·B₃+B₄·B₅+B₆·B₇+B₈·B₉+B10·B11)	-23.9277
Loop 3	0	0	0	0	0	-30578.5	2.65395e+06	1.4419e+06	-33037.5	-2.98176e+06	0	0	0	0	0				-C₁+(C₂·C₃+C₄·C₅+C₆·C₇+C₈·C₉+C10·C11)	-384.321
Loop 4	0	0	4.19931e+06	0	0	0	0	0	0	0	0	2.0601e+06	-4.19846e+06	-142497	0				-D₁+(D₂·D₃+D₄·D₅+D₆·D₇+D₈·D₉)	14642.3
Loop 5	0	0	0	0	0	0	0	0	-33037.5	-2.98176e+06	-4.6368e+06	-2.0601e+06	0	0	8.30036e+06				-E₁+(E₂·E₃+E₄·E₅+E₆·E₇+E₈·E₉+E10·E11)	1488
inv [NL]	-0.678255	-0.880165	0.101198	0.077033	-0.1276	-0.660179	0.000703804	0.00904376	0.0135749	0.0134261	3.06711e-07	1.98739e-08	-3.14247e-09	1.26851e-07	7.64523e-09
	-0.261815	-0.450642	-0.468071	0.500001	0.195819	-0.246792	-0.00216114	0.0548028	0.0857515	0.0848118	2.86837e-07	-9.2139e-08	-2.14639e-08	1.05422e-07	4.99074e-08		final results	[Q]=inv[NL]x[V]
	-0.121394	-0.00299062	0.00793831	0.0232218	-0.0179213	-0.117997	7.71599e-05	0.00264807	0.00404485	0.00400053	-1.7986e-07	1.55463e-09	-9.68712e-10	2.38364e-08	2.31038e-09		result [Q]	Q (m3/s)	Q (m3/h)	sign	Pipe	velocity (m/s)
	-0.678255	0.119835	0.101198	0.077033	-0.1276	-0.660179	0.000703804	0.00904376	0.0135749	0.0134261	3.06711e-07	1.98739e-08	-3.14247e-09	1.26851e-07	7.64523e-09			0.337479	1214.92	1	1	2.60165
	-0.41644	-0.429523	-0.430731	-0.422968	-0.32342	-0.413386	0.00286494	-0.0457591	-0.0721766	-0.0713857	1.98739e-08	1.12013e-07	1.83214e-08	2.14285e-08	-4.22622e-08			0.0985225	354.681	1	2	1.35025
	-0.502673	-0.517825	-0.519223	-0.513269	-0.391806	-0.499034	-0.992984	-0.63271	-0.436972	-0.432183	2.30163e-08	9.36915e-08	-1.3575e-07	2.55397e-08	-9.1921e-09			0.154612	556.602	1	3	8.47583
	0.0862332	0.088302	0.0884929	0.0903012	0.0683868	0.0856474	-0.00415104	0.586951	0.364795	0.360797	-3.14247e-09	1.83214e-08	1.54072e-07	-4.11118e-09	-3.30701e-08			0.920812	3314.92	1	4	12.6198
	0.0862332	0.088302	0.0884929	0.0903012	0.0683868	0.0856474	-0.00415104	-0.413049	0.364795	0.360797	-3.14247e-09	1.83214e-08	1.54072e-07	-4.11118e-09	-3.30701e-08			0.191734	690.242	1	5	10.5109
	0.122253	0.125218	0.125491	0.127888	0.0968831	0.121421	0.00443212	0.325564	0.500036	-0.494485	-4.50276e-09	2.39408e-08	-1.21002e-07	-5.84442e-09	-4.48352e-08			0.0119755	43.1117	1	6	0.164124
	0.122253	0.125218	0.125491	0.127888	0.0968831	0.121421	0.00443212	0.325564	0.500036	0.505515	-4.50276e-09	2.39408e-08	-1.21002e-07	-5.84442e-09	-4.48352e-08			0.0964251	347.13	1	7	5.28604
	-0.375073	-0.356957	-0.355285	-0.358843	-0.51131	-0.379546	-0.00258386	-0.0417262	-0.0629923	-0.062302	-2.75191e-08	-6.97507e-08	1.47487e-08	-3.13841e-08	-3.56431e-08			0.0492029	177.13	1	8	2.69731
	-0.174722	-0.240113	-0.246149	-0.258588	0.343168	-0.157722	-0.0018029	-0.0300344	-0.0453726	-0.0448754	9.93318e-08	-4.83222e-08	1.06375e-08	1.19303e-07	-2.56875e-08			0.0314968	113.389	1	9	0.431665
	-0.200351	-0.116844	-0.109136	-0.100255	0.145522	-0.221824	-0.000780964	-0.0116918	-0.0176197	-0.0174267	-1.26851e-07	-2.14285e-08	4.11118e-09	-1.50687e-07	-9.95561e-09			0.109275	393.389	1	10	5.99045
	-0.200351	-0.116844	-0.109136	-0.100255	0.145522	0.778176	-0.000780964	-0.0116918	-0.0176197	-0.0174267	-1.26851e-07	-2.14285e-08	4.11118e-09	-1.50687e-07	-9.95561e-09			0.175077	630.277	1	11	9.59774
	-0.208487	-0.21352	-0.213984	-0.218189	-0.16527	-0.207068	-0.00028108	0.0874853	0.135169	0.133688	7.64523e-09	-4.22622e-08	-3.30701e-08	9.95561e-09	7.79053e-08			0.0727227	261.802	1	12	3.98667
																		0.15791	568.475	1	13	8.65663
																		0.852354	3068.48	1	14	6.57087
																		0.155411	559.481	1	15	8.51968

## Sheet: iteration 5
	Pipe	D (m)	L (m)	Q (m³/s)	sign (Q)	Re	e/D	1/λ½	λ	R	R·Q²	2·R·Q
Loop I	1	0.4064	100	0.337479	1	1.18799e+06	4.92126e-05	8.98218	0.0123947	90627.2	10321.7	61169.5		Inputs
	2	0.3048	100	0.0985225	1	462424	6.56168e-05	8.39702	0.0141824	436984	4241.66	86105.4
	3	0.1524	100	-0.154612	-1	1.45137e+06	0.000131234	8.59626	0.0135326	1.33428e+07	-318956	4.1259e+06		dynamic water viscosity
	4	0.3048	100	0.920812	1	4.32191e+06	6.56168e-05	9.27206	0.0116318	358396	303882	660031		0.00089 Pa·s
										Σ	-510.442
Loop II	5	0.1524	100	0.191734	1	1.79984e+06	0.000131234	8.64613	0.0133769	1.31893e+07	484863	5.05767e+06		water density
	6	0.3048	200	0.0119755	1	56208	6.56168e-05	6.96611	0.0206072	1.26989e+06	182.117	30415		1000 kg/m3
	11	0.1524	100	-0.175077	-1	1.64348e+06	0.000131234	8.62597	0.0134395	1.3251e+07	-406170	4.6399e+06
	12	0.1524	100	-0.0727227	-1	682661	0.000131234	8.35828	0.0143142	1.41134e+07	-74640	2.05273e+06		absolute pipe roughness
	2	0.3048	100	-0.0985225	-1	462424	6.56168e-05	8.39702	0.0141824	436984	-4241.66	86105.4		0.00002 m
										Σ	-5.94407
Loop III	7	0.1524	100	0.0964251	1	905160	0.000131234	8.45938	0.0139741	1.37781e+07	128106	2.6571e+06
	8	0.1524	100	0.0492029	1	461876	0.000131234	8.19385	0.0148944	1.46855e+07	35552.5	1.44514e+06
	9	0.3048	100	-0.0314968	-1	147833	6.56168e-05	7.66064	0.01704	525031	-520.857	33073.6
	10	0.1524	100	-0.109275	-1	1.02578e+06	0.000131234	8.49951	0.0138424	1.36483e+07	-162973	2.98282e+06
	6	0.3048	200	-0.0119755	-1	56208	6.56168e-05	6.96611	0.0206072	1.26989e+06	-182.117	30415
										Σ	-18.1515
Loop IV	3	0.1524	100	0.154612	1	1.45137e+06	0.000131234	8.59626	0.0135326	1.33428e+07	318956	4.1259e+06
	12	0.1524	100	0.0727227	1	682661	0.000131234	8.35828	0.0143142	1.41134e+07	74640	2.05273e+06
	13	0.1524	100	-0.15791	-1	1.48233e+06	0.000131234	8.60148	0.0135162	1.33266e+07	-332305	4.20879e+06
	14	0.4064	100	-0.852354	-1	3.00045e+06	4.92126e-05	9.3505	0.0114375	83628.1	-60756.5	142562
										Σ	534.674
Loop V	15	0.1524	200	0.155411	1	1.45887e+06	0.000131234	8.59754	0.0135285	2.66776e+07	644336	8.292e+06
	9	0.3048	100	-0.0314968	-1	147833	6.56168e-05	7.66064	0.01704	525031	-520.857	33073.6
	10	0.1524	100	-0.109275	-1	1.02578e+06	0.000131234	8.49951	0.0138424	1.36483e+07	-162973	2.98282e+06
	11	0.1524	100	-0.175077	-1	1.64348e+06	0.000131234	8.62597	0.0134395	1.3251e+07	-406170	4.6399e+06		changed sign (oposite than in previous iteration)
	12	0.1524	100	-0.0727227	-1	682661	0.000131234	8.35828	0.0143142	1.41134e+07	-74640	2.05273e+06		stoping criterion (stop when result is 0.00)
										Σ	31.9732
	Pipe 1	Pipe 2	Pipe 3	Pipe 4	Pipe 5	Pipe 6	Pipe 7	Pipe 8	Pipe 9	Pipe 10	Pipe 11	Pipe 12	Pipe 13	Pipe 14	Pipe 15
Node 1	0	0	-1	-1	0	0	0	0	0	0	0	0	0	-1	0	Node equations			Node 1 - input-consumption	-1.92778	[V]
Node 2	-1	0	0	1	0	0	0	0	0	0	0	0	0	0	0				Node 2 - consumption	0.583333
Node 3	1	-1	0	0	-1	0	0	0	0	0	0	0	0	0	0				Node 3 - consumption	0.0472222
Node 4	0	1	1	0	0	0	0	0	0	0	0	-1	0	0	-1				Node 4 - consumption	0.025
Node 5	0	0	0	0	0	0	0	0	0	0	-1	1	1	0	0				Node 5 - consumption	0.0555556
Node 6	0	0	0	0	0	0	0	0	0	0	0	0	-1	1	0				Node 6 - consumption	0.694444
Node 7	0	0	0	0	1	-1	-1	0	0	0	0	0	0	0	0				Node 7 - consumption	0.0833333
Node 8	0	0	0	0	0	0	1	-1	0	0	0	0	0	0	0				Node 8 - consumption	0.0472222
Node 9	0	0	0	0	0	0	0	1	1	0	0	0	0	0	1				Node 9 - consumption	0.236111
Node 10	0	0	0	0	0	0	0	0	-1	1	0	0	0	0	0				Node 10 - consumption	0.0777778
Loop 1	61169.5	86105.4	-4.1259e+06	660031	0	0	0	0	0	0	0	0	0	0	0	Loop equations			-A₁+(A₂·A₃+A₄·A₅+A₆·A₇+A₈·A₉)	-510.442
Loop 2	0	-86105.4	0	0	5.05767e+06	30415	0	0	0	0	-4.6399e+06	-2.05273e+06	0	0	0				-B₁+(B₂·B₃+B₄·B₅+B₆·B₇+B₈·B₉+B10·B11)	-5.94407
Loop 3	0	0	0	0	0	-30415	2.6571e+06	1.44514e+06	-33073.6	-2.98282e+06	0	0	0	0	0				-C₁+(C₂·C₃+C₄·C₅+C₆·C₇+C₈·C₉+C10·C11)	-18.1515
Loop 4	0	0	4.1259e+06	0	0	0	0	0	0	0	0	2.05273e+06	-4.20879e+06	-142562	0				-D₁+(D₂·D₃+D₄·D₅+D₆·D₇+D₈·D₉)	534.674
Loop 5	0	0	0	0	0	0	0	0	-33073.6	-2.98282e+06	-4.6399e+06	-2.05273e+06	0	0	8.292e+06				-E₁+(E₂·E₃+E₄·E₅+E₆·E₇+E₈·E₉+E10·E11)	31.9732
inv [NL]	-0.676469	-0.880199	0.10092	0.076048	-0.126987	-0.658467	0.000697051	0.00893945	0.0134223	0.0132751	3.08667e-07	1.9816e-08	-3.10202e-09	1.26278e-07	7.55254e-09
	-0.260039	-0.450689	-0.468358	0.498833	0.196516	-0.245081	-0.00215233	0.0547432	0.0856875	0.0847478	2.88851e-07	-9.2178e-08	-2.14126e-08	1.04922e-07	4.98246e-08		final results	[Q]=inv[NL]x[V]
	-0.123673	-0.00329044	0.00786619	0.0237035	-0.018096	-0.120214	7.69253e-05	0.00270506	0.00413445	0.00408911	-1.82389e-07	1.54009e-09	-9.891e-10	2.42629e-08	2.35999e-09		result [Q]	Q (m3/s)	Q (m3/h)	sign	Pipe	velocity (m/s)
	-0.676469	0.119801	0.10092	0.076048	-0.126987	-0.658467	0.000697051	0.00893945	0.0134223	0.0132751	3.08667e-07	1.9816e-08	-3.10202e-09	1.26278e-07	7.55254e-09			0.337568	1215.25	1	1	2.60234
	-0.416431	-0.42951	-0.430722	-0.422785	-0.323503	-0.413386	0.00284938	-0.0458038	-0.0722652	-0.0714727	1.9816e-08	1.11994e-07	1.83106e-08	2.13561e-08	-4.2272e-08			0.0986113	355.001	1	2	1.35147
	-0.502678	-0.517805	-0.519207	-0.513113	-0.391948	-0.49905	-0.993026	-0.632712	-0.436745	-0.431955	2.2918e-08	9.36834e-08	-1.35604e-07	2.54472e-08	-9.20993e-09			0.154505	556.22	1	3	8.47001
	0.0862474	0.0882948	0.0884846	0.0903283	0.0684455	0.0856642	-0.0041244	0.586908	0.364479	0.360482	-3.10202e-09	1.83106e-08	1.53915e-07	-4.09112e-09	-3.30621e-08			0.920902	3315.25	1	4	12.621
	0.0862474	0.0882948	0.0884846	0.0903283	0.0684455	0.0856642	-0.0041244	-0.413092	0.364479	0.360482	-3.10202e-09	1.83106e-08	1.53915e-07	-4.09112e-09	-3.30621e-08			0.191735	690.246	1	5	10.5109
	0.122384	0.125321	0.125593	0.12804	0.0970528	0.121554	0.00440452	0.325523	0.500172	-0.494347	-4.45052e-09	2.39614e-08	-1.20853e-07	-5.82141e-09	-4.48784e-08			0.011972	43.0991	1	6	0.164076
	0.122384	0.125321	0.125593	0.12804	0.0970528	0.121554	0.00440452	0.325523	0.500172	0.505653	-4.45052e-09	2.39614e-08	-1.20853e-07	-5.82141e-09	-4.48784e-08			0.0964297	347.147	1	7	5.28629
	-0.374938	-0.356874	-0.3552	-0.358847	-0.510999	-0.379396	-0.00256926	-0.0417655	-0.0630835	-0.0623917	-2.73685e-08	-6.9722e-08	1.47515e-08	-3.12686e-08	-3.56685e-08			0.0492074	177.147	1	8	2.69756
	-0.17508	-0.240364	-0.246414	-0.259095	0.343918	-0.158076	-0.00179528	-0.030121	-0.0455267	-0.0450274	9.89099e-08	-4.83659e-08	1.06604e-08	1.19273e-07	-2.5756e-08			0.0314971	113.389	1	9	0.431668
	-0.199858	-0.11651	-0.108786	-0.0997515	0.145083	-0.221319	-0.000773976	-0.0116445	-0.0175568	-0.0173642	-1.26278e-07	-2.13561e-08	4.09112e-09	-1.50541e-07	-9.91253e-09			0.109275	393.389	1	10	5.99046
	-0.199858	-0.11651	-0.108786	-0.0997515	0.145083	0.778681	-0.000773976	-0.0116445	-0.0175568	-0.0173642	-1.26278e-07	-2.13561e-08	4.09112e-09	-1.50541e-07	-9.91253e-09			0.175081	630.29	1	11	9.59795
	-0.208631	-0.213616	-0.214078	-0.218368	-0.165498	-0.207218	-0.00028012	0.0875693	0.135349	0.133864	7.55254e-09	-4.2272e-08	-3.30621e-08	9.91253e-09	7.79405e-08			0.0727102	261.757	1	12	3.98598
																		0.157926	568.534	1	13	8.65753
																		0.85237	3068.53	1	14	6.57099
																		0.155407	559.464	1	15	8.51941

## Sheet: iteration 6
	Pipe	D (m)	L (m)	Q (m³/s)	sign (Q)	Re	e/D	1/λ½	λ	R	R·Q²	2·R·Q
Loop I	1	0.4064	100	0.337568	1	1.18831e+06	4.92126e-05	8.98231	0.0123944	90624.6	10326.9	61184		Inputs
	2	0.3048	100	0.0986113	1	462841	6.56168e-05	8.39754	0.0141806	436929	4248.78	86172.3
	3	0.1524	100	-0.154505	-1	1.45037e+06	0.000131234	8.59609	0.0135331	1.33433e+07	-318531	4.12323e+06		dynamic water viscosity
	4	0.3048	100	0.920902	1	4.32234e+06	6.56168e-05	9.27208	0.0116318	358395	303940	660092		0.00089 Pa·s
										Σ	-14.9186
Loop II	5	0.1524	100	0.191735	1	1.79985e+06	0.000131234	8.64614	0.0133769	1.31893e+07	484868	5.05769e+06		water density
	6	0.3048	200	0.011972	1	56191.5	6.56168e-05	6.96589	0.0206085	1.26996e+06	182.021	30407.9		1000 kg/m3
	11	0.1524	100	-0.175081	-1	1.64351e+06	0.000131234	8.62597	0.0134395	1.3251e+07	-406187	4.63999e+06
	12	0.1524	100	-0.0727102	-1	682544	0.000131234	8.35822	0.0143144	1.41136e+07	-74615.4	2.05241e+06		absolute pipe roughness
	2	0.3048	100	-0.0986113	-1	462841	6.56168e-05	8.39754	0.0141806	436929	-4248.78	86172.3		0.00002 m
										Σ	-0.320258
Loop III	7	0.1524	100	0.0964297	1	905203	0.000131234	8.4594	0.013974	1.3778e+07	128117	2.65722e+06
	8	0.1524	100	0.0492074	1	461919	0.000131234	8.1939	0.0148943	1.46854e+07	35558.7	1.44526e+06
	9	0.3048	100	-0.0314971	-1	147834	6.56168e-05	7.66065	0.01704	525030	-520.864	33073.8
	10	0.1524	100	-0.109275	-1	1.02578e+06	0.000131234	8.49951	0.0138424	1.36483e+07	-162974	2.98283e+06
	6	0.3048	200	-0.011972	-1	56191.5	6.56168e-05	6.96589	0.0206085	1.26996e+06	-182.021	30407.9
										Σ	-0.829393
Loop IV	3	0.1524	100	0.154505	1	1.45037e+06	0.000131234	8.59609	0.0135331	1.33433e+07	318531	4.12323e+06
	12	0.1524	100	0.0727102	1	682544	0.000131234	8.35822	0.0143144	1.41136e+07	74615.4	2.05241e+06
	13	0.1524	100	-0.157926	-1	1.48248e+06	0.000131234	8.60151	0.0135161	1.33265e+07	-332371	4.2092e+06
	14	0.4064	100	-0.85237	-1	3.00051e+06	4.92126e-05	9.3505	0.0114375	83628	-60758.7	142564
										Σ	16.0533
Loop V	15	0.1524	200	0.155407	1	1.45883e+06	0.000131234	8.59754	0.0135286	2.66776e+07	644297	8.29176e+06
	9	0.3048	100	-0.0314971	-1	147834	6.56168e-05	7.66065	0.01704	525030	-520.864	33073.8
	10	0.1524	100	-0.109275	-1	1.02578e+06	0.000131234	8.49951	0.0138424	1.36483e+07	-162974	2.98283e+06
	11	0.1524	100	-0.175081	-1	1.64351e+06	0.000131234	8.62597	0.0134395	1.3251e+07	-406187	4.63999e+06		changed sign (oposite than in previous iteration)
	12	0.1524	100	-0.0727102	-1	682544	0.000131234	8.35822	0.0143144	1.41136e+07	-74615.4	2.05241e+06		stoping criterion (stop when result is 0.00)
										Σ	0.444816
	Pipe 1	Pipe 2	Pipe 3	Pipe 4	Pipe 5	Pipe 6	Pipe 7	Pipe 8	Pipe 9	Pipe 10	Pipe 11	Pipe 12	Pipe 13	Pipe 14	Pipe 15
Node 1	0	0	-1	-1	0	0	0	0	0	0	0	0	0	-1	0	Node equations			Node 1 - input-consumption	-1.92778	[V]
Node 2	-1	0	0	1	0	0	0	0	0	0	0	0	0	0	0				Node 2 - consumption	0.583333
Node 3	1	-1	0	0	-1	0	0	0	0	0	0	0	0	0	0				Node 3 - consumption	0.0472222
Node 4	0	1	1	0	0	0	0	0	0	0	0	-1	0	0	-1				Node 4 - consumption	0.025
Node 5	0	0	0	0	0	0	0	0	0	0	-1	1	1	0	0				Node 5 - consumption	0.0555556
Node 6	0	0	0	0	0	0	0	0	0	0	0	0	-1	1	0				Node 6 - consumption	0.694444
Node 7	0	0	0	0	1	-1	-1	0	0	0	0	0	0	0	0				Node 7 - consumption	0.0833333
Node 8	0	0	0	0	0	0	1	-1	0	0	0	0	0	0	0				Node 8 - consumption	0.0472222
Node 9	0	0	0	0	0	0	0	1	1	0	0	0	0	0	1				Node 9 - consumption	0.236111
Node 10	0	0	0	0	0	0	0	0	-1	1	0	0	0	0	0				Node 10 - consumption	0.0777778
Loop 1	61184	86172.3	-4.12323e+06	660092	0	0	0	0	0	0	0	0	0	0	0	Loop equations			-A₁+(A₂·A₃+A₄·A₅+A₆·A₇+A₈·A₉)	-14.9186
Loop 2	0	-86172.3	0	0	5.05769e+06	30407.9	0	0	0	0	-4.63999e+06	-2.05241e+06	0	0	0				-B₁+(B₂·B₃+B₄·B₅+B₆·B₇+B₈·B₉+B10·B11)	-0.320258
Loop 3	0	0	0	0	0	-30407.9	2.65722e+06	1.44526e+06	-33073.8	-2.98283e+06	0	0	0	0	0				-C₁+(C₂·C₃+C₄·C₅+C₆·C₇+C₈·C₉+C10·C11)	-0.829393
Loop 4	0	0	4.12323e+06	0	0	0	0	0	0	0	0	2.05241e+06	-4.2092e+06	-142564	0				-D₁+(D₂·D₃+D₄·D₅+D₆·D₇+D₈·D₉)	16.0533
Loop 5	0	0	0	0	0	0	0	0	-33073.8	-2.98283e+06	-4.63999e+06	-2.05241e+06	0	0	8.29176e+06				-E₁+(E₂·E₃+E₄·E₅+E₆·E₇+E₈·E₉+E10·E11)	0.444816
inv [NL]	-0.676405	-0.880202	0.100908	0.0760105	-0.126962	-0.658406	0.000696769	0.00893534	0.0134163	0.0132692	3.0874e-07	1.98136e-08	-3.10045e-09	1.26257e-07	7.54896e-09
	-0.259975	-0.450693	-0.46837	0.498789	0.196545	-0.245019	-0.00215196	0.0547403	0.0856839	0.0847442	2.88926e-07	-9.218e-08	-2.14104e-08	1.04904e-07	4.98211e-08		final results	[Q]=inv[NL]x[V]
	-0.123757	-0.00330175	0.00786325	0.0237208	-0.0181019	-0.120296	7.69116e-05	0.00270709	0.00413764	0.00409226	-1.82482e-07	1.5395e-09	-9.89823e-10	2.42786e-08	2.36176e-09		result [Q]	Q (m3/s)	Q (m3/h)	sign	Pipe	velocity (m/s)
	-0.676405	0.119798	0.100908	0.0760105	-0.126962	-0.658406	0.000696769	0.00893534	0.0134163	0.0132692	3.0874e-07	1.98136e-08	-3.10045e-09	1.26257e-07	7.54896e-09			0.337571	1215.26	1	1	2.60236
	-0.416431	-0.42951	-0.430722	-0.422778	-0.323507	-0.413387	0.00284873	-0.0458049	-0.0722676	-0.0714751	1.98136e-08	1.11994e-07	1.831e-08	2.13531e-08	-4.22722e-08			0.0986139	355.01	1	2	1.35151
	-0.502678	-0.517803	-0.519205	-0.513107	-0.391954	-0.49905	-0.993028	-0.63271	-0.436734	-0.431944	2.2914e-08	9.36836e-08	-1.356e-07	2.54434e-08	-9.21069e-09			0.154502	556.209	1	3	8.46984
	0.0862468	0.0882934	0.0884831	0.090328	0.0684469	0.0856637	-0.00412331	0.586905	0.364466	0.360469	-3.10045e-09	1.831e-08	1.5391e-07	-4.09027e-09	-3.30615e-08			0.920904	3315.26	1	4	12.621
	0.0862468	0.0882934	0.0884831	0.090328	0.0684469	0.0856637	-0.00412331	-0.413095	0.364466	0.360469	-3.10045e-09	1.831e-08	1.5391e-07	-4.09027e-09	-3.30615e-08			0.191735	690.246	1	5	10.5109
	0.122388	0.125325	0.125597	0.128045	0.0970589	0.121558	0.00440338	0.325523	0.50018	-0.494339	-4.44852e-09	2.39622e-08	-1.20848e-07	-5.82046e-09	-4.48801e-08			0.0119718	43.0986	1	6	0.164074
	0.122388	0.125325	0.125597	0.128045	0.0970589	0.121558	0.00440338	0.325523	0.50018	0.505661	-4.44852e-09	2.39622e-08	-1.20848e-07	-5.82046e-09	-4.48801e-08			0.0964298	347.147	1	7	5.2863
	-0.374934	-0.356872	-0.355198	-0.358848	-0.510987	-0.379391	-0.00256865	-0.0417666	-0.0630863	-0.0623945	-2.73626e-08	-6.97214e-08	1.47515e-08	-3.12638e-08	-3.56694e-08			0.0492076	177.147	1	8	2.69757
	-0.175097	-0.240376	-0.246427	-0.259117	0.343949	-0.158093	-0.00179497	-0.0301242	-0.0455324	-0.0450331	9.88949e-08	-4.83683e-08	1.06612e-08	1.19272e-07	-2.57587e-08			0.031497	113.389	1	9	0.431668
	-0.199838	-0.116496	-0.108771	-0.0997313	0.145064	-0.221299	-0.000773681	-0.0116424	-0.0175539	-0.0173614	-1.26257e-07	-2.13531e-08	4.09027e-09	-1.50536e-07	-9.91073e-09			0.109275	393.389	1	10	5.99046
	-0.199838	-0.116496	-0.108771	-0.0997313	0.145064	0.778701	-0.000773681	-0.0116424	-0.0175539	-0.0173614	-1.26257e-07	-2.13531e-08	4.09027e-09	-1.50536e-07	-9.91073e-09			0.175081	630.291	1	11	9.59795
	-0.208635	-0.213618	-0.21408	-0.218373	-0.165506	-0.207222	-0.000280078	0.0875715	0.135354	0.13387	7.54896e-09	-4.22722e-08	-3.30615e-08	9.91073e-09	7.79416e-08			0.0727097	261.755	1	12	3.98596
																		0.157927	568.536	1	13	8.65756
																		0.852371	3068.54	1	14	6.571
																		0.155406	559.463	1	15	8.51941

## Sheet: iteration 7
	Pipe	D (m)	L (m)	Q (m³/s)	sign (Q)	Re	e/D	1/λ½	λ	R	R·Q²	2·R·Q
Loop I	1	0.4064	100	0.337571	1	1.18832e+06	4.92126e-05	8.98231	0.0123944	90624.5	10327	61184.4		Inputs
	2	0.3048	100	0.0986139	1	462853	6.56168e-05	8.39756	0.0141806	436927	4248.98	86174.2
	3	0.1524	100	-0.154502	-1	1.45034e+06	0.000131234	8.59608	0.0135331	1.33433e+07	-318518	4.12315e+06		dynamic water viscosity
	4	0.3048	100	0.920904	1	4.32235e+06	6.56168e-05	9.27208	0.0116318	358395	303942	660094		0.00089 Pa·s
										Σ	-0.432416
Loop II	5	0.1524	100	0.191735	1	1.79985e+06	0.000131234	8.64614	0.0133769	1.31893e+07	484869	5.0577e+06		water density
	6	0.3048	200	0.0119718	1	56190.8	6.56168e-05	6.96589	0.0206085	1.26997e+06	182.017	30407.7		1000 kg/m3
	11	0.1524	100	-0.175081	-1	1.64351e+06	0.000131234	8.62597	0.0134395	1.3251e+07	-406187	4.64e+06
	12	0.1524	100	-0.0727097	-1	682539	0.000131234	8.35821	0.0143144	1.41136e+07	-74614.6	2.0524e+06		absolute pipe roughness
	2	0.3048	100	-0.0986139	-1	462853	6.56168e-05	8.39756	0.0141806	436927	-4248.98	86174.2		0.00002 m
										Σ	-0.0159198
Loop III	7	0.1524	100	0.0964298	1	905204	0.000131234	8.4594	0.013974	1.3778e+07	128118	2.65722e+06
	8	0.1524	100	0.0492076	1	461921	0.000131234	8.1939	0.0148943	1.46853e+07	35558.9	1.44526e+06
	9	0.3048	100	-0.031497	-1	147834	6.56168e-05	7.66065	0.01704	525030	-520.863	33073.8
	10	0.1524	100	-0.109275	-1	1.02578e+06	0.000131234	8.49951	0.0138424	1.36483e+07	-162974	2.98283e+06
	6	0.3048	200	-0.0119718	-1	56190.8	6.56168e-05	6.96589	0.0206085	1.26997e+06	-182.017	30407.7
										Σ	-0.0365326
Loop IV	3	0.1524	100	0.154502	1	1.45034e+06	0.000131234	8.59608	0.0135331	1.33433e+07	318518	4.12315e+06
	12	0.1524	100	0.0727097	1	682539	0.000131234	8.35821	0.0143144	1.41136e+07	74614.6	2.0524e+06
	13	0.1524	100	-0.157927	-1	1.48249e+06	0.000131234	8.60151	0.0135161	1.33265e+07	-332374	4.20922e+06
	14	0.4064	100	-0.852371	-1	3.00051e+06	4.92126e-05	9.3505	0.0114375	83628	-60758.8	142564
										Σ	0.480068
Loop V	15	0.1524	200	0.155406	1	1.45883e+06	0.000131234	8.59754	0.0135286	2.66776e+07	644296	8.29176e+06
	9	0.3048	100	-0.031497	-1	147834	6.56168e-05	7.66065	0.01704	525030	-520.863	33073.8
	10	0.1524	100	-0.109275	-1	1.02578e+06	0.000131234	8.49951	0.0138424	1.36483e+07	-162974	2.98283e+06
	11	0.1524	100	-0.175081	-1	1.64351e+06	0.000131234	8.62597	0.0134395	1.3251e+07	-406187	4.64e+06		changed sign (oposite than in previous iteration)
	12	0.1524	100	-0.0727097	-1	682539	0.000131234	8.35821	0.0143144	1.41136e+07	-74614.6	2.0524e+06		stoping criterion (stop when result is 0.00)
										Σ	-0.00464249
	Pipe 1	Pipe 2	Pipe 3	Pipe 4	Pipe 5	Pipe 6	Pipe 7	Pipe 8	Pipe 9	Pipe 10	Pipe 11	Pipe 12	Pipe 13	Pipe 14	Pipe 15
Node 1	0	0	-1	-1	0	0	0	0	0	0	0	0	0	-1	0	Node equations			Node 1 - input-consumption	-1.92778	[V]
Node 2	-1	0	0	1	0	0	0	0	0	0	0	0	0	0	0				Node 2 - consumption	0.583333
Node 3	1	-1	0	0	-1	0	0	0	0	0	0	0	0	0	0				Node 3 - consumption	0.0472222
Node 4	0	1	1	0	0	0	0	0	0	0	0	-1	0	0	-1				Node 4 - consumption	0.025
Node 5	0	0	0	0	0	0	0	0	0	0	-1	1	1	0	0				Node 5 - consumption	0.0555556
Node 6	0	0	0	0	0	0	0	0	0	0	0	0	-1	1	0				Node 6 - consumption	0.694444
Node 7	0	0	0	0	1	-1	-1	0	0	0	0	0	0	0	0				Node 7 - consumption	0.0833333
Node 8	0	0	0	0	0	0	1	-1	0	0	0	0	0	0	0				Node 8 - consumption	0.0472222
Node 9	0	0	0	0	0	0	0	1	1	0	0	0	0	0	1				Node 9 - consumption	0.236111
Node 10	0	0	0	0	0	0	0	0	-1	1	0	0	0	0	0				Node 10 - consumption	0.0777778
Loop 1	61184.4	86174.2	-4.12315e+06	660094	0	0	0	0	0	0	0	0	0	0	0	Loop equations			-A₁+(A₂·A₃+A₄·A₅+A₆·A₇+A₈·A₉)	-0.432416
Loop 2	0	-86174.2	0	0	5.0577e+06	30407.7	0	0	0	0	-4.64e+06	-2.0524e+06	0	0	0				-B₁+(B₂·B₃+B₄·B₅+B₆·B₇+B₈·B₉+B10·B11)	-0.0159198
Loop 3	0	0	0	0	0	-30407.7	2.65722e+06	1.44526e+06	-33073.8	-2.98283e+06	0	0	0	0	0				-C₁+(C₂·C₃+C₄·C₅+C₆·C₇+C₈·C₉+C10·C11)	-0.0365326
Loop 4	0	0	4.12315e+06	0	0	0	0	0	0	0	0	2.0524e+06	-4.20922e+06	-142564	0				-D₁+(D₂·D₃+D₄·D₅+D₆·D₇+D₈·D₉)	0.480068
Loop 5	0	0	0	0	0	0	0	0	-33073.8	-2.98283e+06	-4.64e+06	-2.0524e+06	0	0	8.29176e+06				-E₁+(E₂·E₃+E₄·E₅+E₆·E₇+E₈·E₉+E10·E11)	-0.00464249
inv [NL]	-0.676404	-0.880202	0.100908	0.0760093	-0.126961	-0.658404	0.000696759	0.00893521	0.0134161	0.013269	3.08742e-07	1.98135e-08	-3.1004e-09	1.26257e-07	7.54885e-09
	-0.259973	-0.450693	-0.468371	0.498788	0.196546	-0.245017	-0.00215194	0.0547402	0.0856837	0.0847441	2.88928e-07	-9.21801e-08	-2.14104e-08	1.04904e-07	4.9821e-08		final results	[Q]=inv[NL]x[V]
	-0.123759	-0.00330209	0.00786315	0.0237213	-0.018102	-0.120298	7.69109e-05	0.00270714	0.00413773	0.00409235	-1.82485e-07	1.53948e-09	-9.89843e-10	2.42791e-08	2.36181e-09		result [Q]	Q (m3/s)	Q (m3/h)	sign	Pipe	velocity (m/s)
	-0.676404	0.119798	0.100908	0.0760093	-0.126961	-0.658404	0.000696759	0.00893521	0.0134161	0.013269	3.08742e-07	1.98135e-08	-3.1004e-09	1.26257e-07	7.54885e-09			0.337571	1215.26	1	1	2.60236
	-0.416431	-0.42951	-0.430722	-0.422778	-0.323507	-0.413387	0.0028487	-0.045805	-0.0722676	-0.0714751	1.98135e-08	1.11994e-07	1.831e-08	2.1353e-08	-4.22722e-08			0.0986139	355.01	1	2	1.35151
	-0.502677	-0.517803	-0.519205	-0.513106	-0.391954	-0.49905	-0.993028	-0.63271	-0.436733	-0.431944	2.29139e-08	9.36836e-08	-1.35599e-07	2.54432e-08	-9.21072e-09			0.154502	556.208	1	3	8.46984
	0.0862467	0.0882933	0.088483	0.090328	0.0684469	0.0856636	-0.00412326	0.586905	0.364466	0.360469	-3.1004e-09	1.831e-08	1.53909e-07	-4.09024e-09	-3.30615e-08			0.920904	3315.26	1	4	12.621
	0.0862467	0.0882933	0.088483	0.090328	0.0684469	0.0856636	-0.00412326	-0.413095	0.364466	0.360469	-3.1004e-09	1.831e-08	1.53909e-07	-4.09024e-09	-3.30615e-08			0.191735	690.246	1	5	10.5109
	0.122388	0.125325	0.125597	0.128045	0.0970591	0.121559	0.00440334	0.325523	0.50018	-0.494338	-4.44845e-09	2.39622e-08	-1.20848e-07	-5.82043e-09	-4.48801e-08			0.0119718	43.0985	1	6	0.164074
	0.122388	0.125325	0.125597	0.128045	0.0970591	0.121559	0.00440334	0.325523	0.50018	0.505662	-4.44845e-09	2.39622e-08	-1.20848e-07	-5.82043e-09	-4.48801e-08			0.0964298	347.147	1	7	5.2863
	-0.374934	-0.356872	-0.355198	-0.358849	-0.510987	-0.379391	-0.00256862	-0.0417666	-0.0630864	-0.0623946	-2.73624e-08	-6.97214e-08	1.47515e-08	-3.12637e-08	-3.56694e-08			0.0492076	177.147	1	8	2.69757
	-0.175097	-0.240377	-0.246428	-0.259118	0.34395	-0.158093	-0.00179495	-0.0301243	-0.0455326	-0.0450332	9.88945e-08	-4.83684e-08	1.06613e-08	1.19272e-07	-2.57588e-08			0.031497	113.389	1	9	0.431668
	-0.199837	-0.116496	-0.108771	-0.0997307	0.145063	-0.221298	-0.000773669	-0.0116424	-0.0175538	-0.0173613	-1.26257e-07	-2.1353e-08	4.09024e-09	-1.50536e-07	-9.91067e-09			0.109275	393.389	1	10	5.99046
	-0.199837	-0.116496	-0.108771	-0.0997307	0.145063	0.778702	-0.000773669	-0.0116424	-0.0175538	-0.0173613	-1.26257e-07	-2.1353e-08	4.09024e-09	-1.50536e-07	-9.91067e-09			0.175081	630.291	1	11	9.59795
	-0.208635	-0.213618	-0.21408	-0.218373	-0.165506	-0.207222	-0.000280076	0.0875716	0.135354	0.13387	7.54885e-09	-4.22722e-08	-3.30615e-08	9.91067e-09	7.79416e-08			0.0727097	261.755	1	12	3.98596
																		0.157927	568.536	1	13	8.65756
																		0.852371	3068.54	1	14	6.571
																		0.155406	559.463	1	15	8.51941

## Sheet: iteration 8
	Pipe	D (m)	L (m)	Q (m³/s)	sign (Q)	Re	e/D	1/λ½	λ	R	R·Q²	2·R·Q
Loop I	1	0.4064	100	0.337571	1	1.18832e+06	4.92126e-05	8.98231	0.0123944	90624.5	10327.1	61184.4		Inputs
	2	0.3048	100	0.0986139	1	462853	6.56168e-05	8.39756	0.0141806	436927	4248.99	86174.2
	3	0.1524	100	-0.154502	-1	1.45034e+06	0.000131234	8.59608	0.0135331	1.33433e+07	-318518	4.12315e+06		dynamic water viscosity
	4	0.3048	100	0.920904	1	4.32235e+06	6.56168e-05	9.27208	0.0116318	358395	303942	660094		0.00089 Pa·s
										Σ	-0.0125309
Loop II	5	0.1524	100	0.191735	1	1.79985e+06	0.000131234	8.64614	0.0133769	1.31893e+07	484869	5.0577e+06		water density
	6	0.3048	200	0.0119718	1	56190.8	6.56168e-05	6.96589	0.0206085	1.26997e+06	182.017	30407.6		1000 kg/m3
	11	0.1524	100	-0.175081	-1	1.64351e+06	0.000131234	8.62597	0.0134395	1.3251e+07	-406187	4.64e+06
	12	0.1524	100	-0.0727097	-1	682539	0.000131234	8.35821	0.0143144	1.41136e+07	-74614.6	2.0524e+06		absolute pipe roughness
	2	0.3048	100	-0.0986139	-1	462853	6.56168e-05	8.39756	0.0141806	436927	-4248.99	86174.2		0.00002 m
										Σ	-0.000736037
Loop III	7	0.1524	100	0.0964298	1	905204	0.000131234	8.4594	0.013974	1.3778e+07	128118	2.65722e+06
	8	0.1524	100	0.0492076	1	461921	0.000131234	8.1939	0.0148943	1.46853e+07	35559	1.44526e+06
	9	0.3048	100	-0.031497	-1	147834	6.56168e-05	7.66065	0.01704	525030	-520.863	33073.8
	10	0.1524	100	-0.109275	-1	1.02578e+06	0.000131234	8.49951	0.0138424	1.36483e+07	-162974	2.98283e+06
	6	0.3048	200	-0.0119718	-1	56190.8	6.56168e-05	6.96589	0.0206085	1.26997e+06	-182.017	30407.6
										Σ	-0.0015749
Loop IV	3	0.1524	100	0.154502	1	1.45034e+06	0.000131234	8.59608	0.0135331	1.33433e+07	318518	4.12315e+06
	12	0.1524	100	0.0727097	1	682539	0.000131234	8.35821	0.0143144	1.41136e+07	74614.6	2.0524e+06
	13	0.1524	100	-0.157927	-1	1.48249e+06	0.000131234	8.60151	0.0135161	1.33265e+07	-332374	4.20922e+06
	14	0.4064	100	-0.852371	-1	3.00051e+06	4.92126e-05	9.3505	0.0114375	83628	-60758.8	142564
										Σ	0.014421
Loop V	15	0.1524	200	0.155406	1	1.45883e+06	0.000131234	8.59754	0.0135286	2.66776e+07	644296	8.29176e+06
	9	0.3048	100	-0.031497	-1	147834	6.56168e-05	7.66065	0.01704	525030	-520.863	33073.8
	10	0.1524	100	-0.109275	-1	1.02578e+06	0.000131234	8.49951	0.0138424	1.36483e+07	-162974	2.98283e+06
	11	0.1524	100	-0.175081	-1	1.64351e+06	0.000131234	8.62597	0.0134395	1.3251e+07	-406187	4.64e+06		changed sign (oposite than in previous iteration)
	12	0.1524	100	-0.0727097	-1	682539	0.000131234	8.35821	0.0143144	1.41136e+07	-74614.6	2.0524e+06		stoping criterion (stop when result is 0.00)
										Σ	-0.000770799
	Pipe 1	Pipe 2	Pipe 3	Pipe 4	Pipe 5	Pipe 6	Pipe 7	Pipe 8	Pipe 9	Pipe 10	Pipe 11	Pipe 12	Pipe 13	Pipe 14	Pipe 15
Node 1	0	0	-1	-1	0	0	0	0	0	0	0	0	0	-1	0	Node equations			Node 1 - input-consumption	-1.92778	[V]
Node 2	-1	0	0	1	0	0	0	0	0	0	0	0	0	0	0				Node 2 - consumption	0.583333
Node 3	1	-1	0	0	-1	0	0	0	0	0	0	0	0	0	0				Node 3 - consumption	0.0472222
Node 4	0	1	1	0	0	0	0	0	0	0	0	-1	0	0	-1				Node 4 - consumption	0.025
Node 5	0	0	0	0	0	0	0	0	0	0	-1	1	1	0	0				Node 5 - consumption	0.0555556
Node 6	0	0	0	0	0	0	0	0	0	0	0	0	-1	1	0				Node 6 - consumption	0.694444
Node 7	0	0	0	0	1	-1	-1	0	0	0	0	0	0	0	0				Node 7 - consumption	0.0833333
Node 8	0	0	0	0	0	0	1	-1	0	0	0	0	0	0	0				Node 8 - consumption	0.0472222
Node 9	0	0	0	0	0	0	0	1	1	0	0	0	0	0	1				Node 9 - consumption	0.236111
Node 10	0	0	0	0	0	0	0	0	-1	1	0	0	0	0	0				Node 10 - consumption	0.0777778
Loop 1	61184.4	86174.2	-4.12315e+06	660094	0	0	0	0	0	0	0	0	0	0	0	Loop equations			-A₁+(A₂·A₃+A₄·A₅+A₆·A₇+A₈·A₉)	-0.0125309
Loop 2	0	-86174.2	0	0	5.0577e+06	30407.6	0	0	0	0	-4.64e+06	-2.0524e+06	0	0	0				-B₁+(B₂·B₃+B₄·B₅+B₆·B₇+B₈·B₉+B10·B11)	-0.000736038
Loop 3	0	0	0	0	0	-30407.6	2.65722e+06	1.44526e+06	-33073.8	-2.98283e+06	0	0	0	0	0				-C₁+(C₂·C₃+C₄·C₅+C₆·C₇+C₈·C₉+C10·C11)	-0.0015749
Loop 4	0	0	4.12315e+06	0	0	0	0	0	0	0	0	2.0524e+06	-4.20922e+06	-142564	0				-D₁+(D₂·D₃+D₄·D₅+D₆·D₇+D₈·D₉)	0.014421
Loop 5	0	0	0	0	0	0	0	0	-33073.8	-2.98283e+06	-4.64e+06	-2.0524e+06	0	0	8.29176e+06				-E₁+(E₂·E₃+E₄·E₅+E₆·E₇+E₈·E₉+E10·E11)	-0.000770799
inv [NL]	-0.676404	-0.880202	0.100907	0.0760093	-0.126961	-0.658404	0.000696758	0.0089352	0.0134161	0.013269	3.08742e-07	1.98135e-08	-3.1004e-09	1.26257e-07	7.54885e-09
	-0.259973	-0.450693	-0.468371	0.498788	0.196546	-0.245017	-0.00215194	0.0547402	0.0856837	0.0847441	2.88928e-07	-9.21801e-08	-2.14104e-08	1.04904e-07	4.9821e-08		final results	[Q]=inv[NL]x[V]
	-0.123759	-0.0033021	0.00786315	0.0237213	-0.018102	-0.120298	7.69109e-05	0.00270715	0.00413773	0.00409235	-1.82485e-07	1.53948e-09	-9.89844e-10	2.42791e-08	2.36182e-09		result [Q]	Q (m3/s)	Q (m3/h)	sign	Pipe	velocity (m/s)
	-0.676404	0.119798	0.100907	0.0760093	-0.126961	-0.658404	0.000696758	0.0089352	0.0134161	0.013269	3.08742e-07	1.98135e-08	-3.1004e-09	1.26257e-07	7.54885e-09			0.337571	1215.26	1	1	2.60236
	-0.416431	-0.42951	-0.430722	-0.422778	-0.323507	-0.413387	0.0028487	-0.045805	-0.0722676	-0.0714751	1.98135e-08	1.11994e-07	1.831e-08	2.1353e-08	-4.22722e-08			0.0986139	355.01	1	2	1.35151
	-0.502677	-0.517803	-0.519205	-0.513106	-0.391954	-0.49905	-0.993028	-0.63271	-0.436733	-0.431944	2.29139e-08	9.36836e-08	-1.35599e-07	2.54432e-08	-9.21072e-09			0.154502	556.208	1	3	8.46984
	0.0862467	0.0882933	0.088483	0.090328	0.0684469	0.0856636	-0.00412326	0.586905	0.364466	0.360469	-3.1004e-09	1.831e-08	1.53909e-07	-4.09024e-09	-3.30615e-08			0.920904	3315.26	1	4	12.621
	0.0862467	0.0882933	0.088483	0.090328	0.0684469	0.0856636	-0.00412326	-0.413095	0.364466	0.360469	-3.1004e-09	1.831e-08	1.53909e-07	-4.09024e-09	-3.30615e-08			0.191735	690.246	1	5	10.5109
	0.122388	0.125325	0.125597	0.128045	0.0970591	0.121559	0.00440334	0.325523	0.50018	-0.494338	-4.44845e-09	2.39622e-08	-1.20848e-07	-5.82042e-09	-4.48801e-08			0.0119718	43.0985	1	6	0.164074
	0.122388	0.125325	0.125597	0.128045	0.0970591	0.121559	0.00440334	0.325523	0.50018	0.505662	-4.44845e-09	2.39622e-08	-1.20848e-07	-5.82042e-09	-4.48801e-08			0.0964298	347.147	1	7	5.2863
	-0.374934	-0.356872	-0.355198	-0.358849	-0.510987	-0.379391	-0.00256862	-0.0417666	-0.0630864	-0.0623946	-2.73624e-08	-6.97214e-08	1.47515e-08	-3.12637e-08	-3.56694e-08			0.0492076	177.147	1	8	2.69757
	-0.175097	-0.240377	-0.246428	-0.259118	0.34395	-0.158093	-0.00179495	-0.0301243	-0.0455326	-0.0450332	9.88945e-08	-4.83684e-08	1.06613e-08	1.19272e-07	-2.57588e-08			0.031497	113.389	1	9	0.431668
	-0.199837	-0.116496	-0.108771	-0.0997306	0.145063	-0.221298	-0.000773669	-0.0116423	-0.0175538	-0.0173613	-1.26257e-07	-2.1353e-08	4.09024e-09	-1.50536e-07	-9.91066e-09			0.109275	393.389	1	10	5.99046
	-0.199837	-0.116496	-0.108771	-0.0997306	0.145063	0.778702	-0.000773669	-0.0116423	-0.0175538	-0.0173613	-1.26257e-07	-2.1353e-08	4.09024e-09	-1.50536e-07	-9.91066e-09			0.175081	630.291	1	11	9.59795
	-0.208635	-0.213618	-0.21408	-0.218373	-0.165506	-0.207222	-0.000280076	0.0875716	0.135354	0.13387	7.54885e-09	-4.22722e-08	-3.30615e-08	9.91066e-09	7.79416e-08			0.0727097	261.755	1	12	3.98596
																		0.157927	568.536	1	13	8.65756
																		0.852371	3068.54	1	14	6.571
																		0.155406	559.463	1	15	8.51941

## Sheet: iteration 9
	Pipe	D (m)	L (m)	Q (m³/s)	sign (Q)	Re	e/D	1/λ½	λ	R	R·Q²	2·R·Q
Loop I	1	0.4064	100	0.337571	1	1.18832e+06	4.92126e-05	8.98231	0.0123944	90624.5	10327.1	61184.4		Inputs
	2	0.3048	100	0.0986139	1	462853	6.56168e-05	8.39756	0.0141806	436927	4248.99	86174.3
	3	0.1524	100	-0.154502	-1	1.45034e+06	0.000131234	8.59608	0.0135331	1.33433e+07	-318518	4.12315e+06		dynamic water viscosity
	4	0.3048	100	0.920904	1	4.32235e+06	6.56168e-05	9.27208	0.0116318	358395	303942	660094		0.00089 Pa·s
										Σ	-0.000363122
Loop II	5	0.1524	100	0.191735	1	1.79985e+06	0.000131234	8.64614	0.0133769	1.31893e+07	484869	5.0577e+06		water density
	6	0.3048	200	0.0119718	1	56190.8	6.56168e-05	6.96589	0.0206085	1.26997e+06	182.017	30407.6		1000 kg/m3
	11	0.1524	100	-0.175081	-1	1.64351e+06	0.000131234	8.62597	0.0134395	1.3251e+07	-406187	4.64e+06
	12	0.1524	100	-0.0727097	-1	682539	0.000131234	8.35821	0.0143144	1.41136e+07	-74614.6	2.0524e+06		absolute pipe roughness
	2	0.3048	100	-0.0986139	-1	462853	6.56168e-05	8.39756	0.0141806	436927	-4248.99	86174.3		0.00002 m
										Σ	-3.20578e-05
Loop III	7	0.1524	100	0.0964298	1	905204	0.000131234	8.4594	0.013974	1.3778e+07	128118	2.65722e+06
	8	0.1524	100	0.0492076	1	461921	0.000131234	8.1939	0.0148943	1.46853e+07	35559	1.44526e+06
	9	0.3048	100	-0.031497	-1	147834	6.56168e-05	7.66065	0.01704	525030	-520.863	33073.8
	10	0.1524	100	-0.109275	-1	1.02578e+06	0.000131234	8.49951	0.0138424	1.36483e+07	-162974	2.98283e+06
	6	0.3048	200	-0.0119718	-1	56190.8	6.56168e-05	6.96589	0.0206085	1.26997e+06	-182.017	30407.6
										Σ	-6.70368e-05
Loop IV	3	0.1524	100	0.154502	1	1.45034e+06	0.000131234	8.59608	0.0135331	1.33433e+07	318518	4.12315e+06
	12	0.1524	100	0.0727097	1	682539	0.000131234	8.35821	0.0143144	1.41136e+07	74614.6	2.0524e+06
	13	0.1524	100	-0.157927	-1	1.48249e+06	0.000131234	8.60151	0.0135161	1.33265e+07	-332374	4.20922e+06
	14	0.4064	100	-0.852371	-1	3.00051e+06	4.92126e-05	9.3505	0.0114375	83628	-60758.8	142564
										Σ	0.000435553
Loop V	15	0.1524	200	0.155406	1	1.45883e+06	0.000131234	8.59754	0.0135286	2.66776e+07	644296	8.29176e+06
	9	0.3048	100	-0.031497	-1	147834	6.56168e-05	7.66065	0.01704	525030	-520.863	33073.8
	10	0.1524	100	-0.109275	-1	1.02578e+06	0.000131234	8.49951	0.0138424	1.36483e+07	-162974	2.98283e+06
	11	0.1524	100	-0.175081	-1	1.64351e+06	0.000131234	8.62597	0.0134395	1.3251e+07	-406187	4.64e+06		changed sign (oposite than in previous iteration)
	12	0.1524	100	-0.0727097	-1	682539	0.000131234	8.35821	0.0143144	1.41136e+07	-74614.6	2.0524e+06		stoping criterion (stop when result is 0.00)
										Σ	-4.54925e-05
	Pipe 1	Pipe 2	Pipe 3	Pipe 4	Pipe 5	Pipe 6	Pipe 7	Pipe 8	Pipe 9	Pipe 10	Pipe 11	Pipe 12	Pipe 13	Pipe 14	Pipe 15
Node 1	0	0	-1	-1	0	0	0	0	0	0	0	0	0	-1	0	Node equations			Node 1 - input-consumption	-1.92778	[V]
Node 2	-1	0	0	1	0	0	0	0	0	0	0	0	0	0	0				Node 2 - consumption	0.583333
Node 3	1	-1	0	0	-1	0	0	0	0	0	0	0	0	0	0				Node 3 - consumption	0.0472222
Node 4	0	1	1	0	0	0	0	0	0	0	0	-1	0	0	-1				Node 4 - consumption	0.025
Node 5	0	0	0	0	0	0	0	0	0	0	-1	1	1	0	0				Node 5 - consumption	0.0555556
Node 6	0	0	0	0	0	0	0	0	0	0	0	0	-1	1	0				Node 6 - consumption	0.694444
Node 7	0	0	0	0	1	-1	-1	0	0	0	0	0	0	0	0				Node 7 - consumption	0.0833333
Node 8	0	0	0	0	0	0	1	-1	0	0	0	0	0	0	0				Node 8 - consumption	0.0472222
Node 9	0	0	0	0	0	0	0	1	1	0	0	0	0	0	1				Node 9 - consumption	0.236111
Node 10	0	0	0	0	0	0	0	0	-1	1	0	0	0	0	0				Node 10 - consumption	0.0777778
Loop 1	61184.4	86174.3	-4.12315e+06	660094	0	0	0	0	0	0	0	0	0	0	0	Loop equations			-A₁+(A₂·A₃+A₄·A₅+A₆·A₇+A₈·A₉)	-0.000363122
Loop 2	0	-86174.3	0	0	5.0577e+06	30407.6	0	0	0	0	-4.64e+06	-2.0524e+06	0	0	0				-B₁+(B₂·B₃+B₄·B₅+B₆·B₇+B₈·B₉+B10·B11)	-3.20579e-05
Loop 3	0	0	0	0	0	-30407.6	2.65722e+06	1.44526e+06	-33073.8	-2.98283e+06	0	0	0	0	0				-C₁+(C₂·C₃+C₄·C₅+C₆·C₇+C₈·C₉+C10·C11)	-6.70368e-05
Loop 4	0	0	4.12315e+06	0	0	0	0	0	0	0	0	2.0524e+06	-4.20922e+06	-142564	0				-D₁+(D₂·D₃+D₄·D₅+D₆·D₇+D₈·D₉)	0.000435553
Loop 5	0	0	0	0	0	0	0	0	-33073.8	-2.98283e+06	-4.64e+06	-2.0524e+06	0	0	8.29176e+06				-E₁+(E₂·E₃+E₄·E₅+E₆·E₇+E₈·E₉+E10·E11)	-4.54926e-05
inv [NL]	-0.676404	-0.880202	0.100907	0.0760093	-0.126961	-0.658404	0.000696758	0.0089352	0.0134161	0.013269	3.08742e-07	1.98135e-08	-3.1004e-09	1.26257e-07	7.54885e-09
	-0.259973	-0.450693	-0.468371	0.498788	0.196546	-0.245017	-0.00215194	0.0547402	0.0856837	0.0847441	2.88928e-07	-9.21801e-08	-2.14104e-08	1.04904e-07	4.9821e-08		final results	[Q]=inv[NL]x[V]
	-0.123759	-0.0033021	0.00786315	0.0237213	-0.018102	-0.120298	7.69109e-05	0.00270715	0.00413773	0.00409235	-1.82485e-07	1.53948e-09	-9.89844e-10	2.42791e-08	2.36182e-09		result [Q]	Q (m3/s)	Q (m3/h)	sign	Pipe	velocity (m/s)
	-0.676404	0.119798	0.100907	0.0760093	-0.126961	-0.658404	0.000696758	0.0089352	0.0134161	0.013269	3.08742e-07	1.98135e-08	-3.1004e-09	1.26257e-07	7.54885e-09			0.337571	1215.26	1	1	2.60236
	-0.416431	-0.42951	-0.430722	-0.422778	-0.323507	-0.413387	0.0028487	-0.045805	-0.0722676	-0.0714751	1.98135e-08	1.11994e-07	1.831e-08	2.1353e-08	-4.22722e-08			0.0986139	355.01	1	2	1.35151
	-0.502677	-0.517803	-0.519205	-0.513106	-0.391954	-0.49905	-0.993028	-0.63271	-0.436733	-0.431944	2.29139e-08	9.36836e-08	-1.35599e-07	2.54432e-08	-9.21072e-09			0.154502	556.208	1	3	8.46984
	0.0862467	0.0882933	0.088483	0.090328	0.0684469	0.0856636	-0.00412326	0.586905	0.364466	0.360469	-3.1004e-09	1.831e-08	1.53909e-07	-4.09024e-09	-3.30615e-08			0.920904	3315.26	1	4	12.621
	0.0862467	0.0882933	0.088483	0.090328	0.0684469	0.0856636	-0.00412326	-0.413095	0.364466	0.360469	-3.1004e-09	1.831e-08	1.53909e-07	-4.09024e-09	-3.30615e-08			0.191735	690.246	1	5	10.5109
	0.122388	0.125325	0.125597	0.128045	0.0970591	0.121559	0.00440334	0.325523	0.50018	-0.494338	-4.44845e-09	2.39622e-08	-1.20848e-07	-5.82042e-09	-4.48801e-08			0.0119718	43.0985	1	6	0.164074
	0.122388	0.125325	0.125597	0.128045	0.0970591	0.121559	0.00440334	0.325523	0.50018	0.505662	-4.44845e-09	2.39622e-08	-1.20848e-07	-5.82042e-09	-4.48801e-08			0.0964298	347.147	1	7	5.2863
	-0.374934	-0.356872	-0.355198	-0.358849	-0.510987	-0.379391	-0.00256862	-0.0417666	-0.0630864	-0.0623946	-2.73624e-08	-6.97214e-08	1.47515e-08	-3.12637e-08	-3.56694e-08			0.0492076	177.147	1	8	2.69757
	-0.175097	-0.240377	-0.246428	-0.259118	0.34395	-0.158093	-0.00179495	-0.0301243	-0.0455326	-0.0450332	9.88945e-08	-4.83684e-08	1.06613e-08	1.19272e-07	-2.57588e-08			0.031497	113.389	1	9	0.431668
	-0.199837	-0.116496	-0.108771	-0.0997306	0.145063	-0.221298	-0.000773669	-0.0116423	-0.0175538	-0.0173613	-1.26257e-07	-2.1353e-08	4.09024e-09	-1.50536e-07	-9.91066e-09			0.109275	393.389	1	10	5.99046
	-0.199837	-0.116496	-0.108771	-0.0997306	0.145063	0.778702	-0.000773669	-0.0116423	-0.0175538	-0.0173613	-1.26257e-07	-2.1353e-08	4.09024e-09	-1.50536e-07	-9.91066e-09			0.175081	630.291	1	11	9.59795
	-0.208635	-0.213618	-0.21408	-0.218373	-0.165506	-0.207222	-0.000280076	0.0875716	0.135354	0.13387	7.54885e-09	-4.22722e-08	-3.30615e-08	9.91066e-09	7.79416e-08			0.0727097	261.755	1	12	3.98596
																		0.157927	568.536	1	13	8.65756
																		0.852371	3068.54	1	14	6.571
																		0.155406	559.463	1	15	8.51941

## Sheet: iteration 10
	Pipe	D (m)	L (m)	Q (m³/s)	sign (Q)	Re	e/D	1/λ½	λ	R	R·Q²	2·R·Q
Loop I	1	0.4064	100	0.337571	1	1.18832e+06	4.92126e-05	8.98231	0.0123944	90624.5	10327.1	61184.4		Inputs
	2	0.3048	100	0.0986139	1	462853	6.56168e-05	8.39756	0.0141806	436927	4248.99	86174.3
	3	0.1524	100	-0.154502	-1	1.45034e+06	0.000131234	8.59608	0.0135331	1.33433e+07	-318518	4.12315e+06		dynamic water viscosity
	4	0.3048	100	0.920904	1	4.32235e+06	6.56168e-05	9.27208	0.0116318	358395	303942	660094		0.00089 Pa·s
										Σ	-1.05219e-05
Loop II	5	0.1524	100	0.191735	1	1.79985e+06	0.000131234	8.64614	0.0133769	1.31893e+07	484869	5.0577e+06		water density
	6	0.3048	200	0.0119718	1	56190.8	6.56168e-05	6.96589	0.0206085	1.26997e+06	182.017	30407.6		1000 kg/m3
	11	0.1524	100	-0.175081	-1	1.64351e+06	0.000131234	8.62597	0.0134395	1.3251e+07	-406187	4.64e+06
	12	0.1524	100	-0.0727097	-1	682539	0.000131234	8.35821	0.0143144	1.41136e+07	-74614.6	2.0524e+06		absolute pipe roughness
	2	0.3048	100	-0.0986139	-1	462853	6.56168e-05	8.39756	0.0141806	436927	-4248.99	86174.3		0.00002 m
										Σ	-1.33342e-06
Loop III	7	0.1524	100	0.0964298	1	905204	0.000131234	8.4594	0.013974	1.3778e+07	128118	2.65722e+06
	8	0.1524	100	0.0492076	1	461921	0.000131234	8.1939	0.0148943	1.46853e+07	35559	1.44526e+06
	9	0.3048	100	-0.031497	-1	147834	6.56168e-05	7.66065	0.01704	525030	-520.863	33073.8
	10	0.1524	100	-0.109275	-1	1.02578e+06	0.000131234	8.49951	0.0138424	1.36483e+07	-162974	2.98283e+06
	6	0.3048	200	-0.0119718	-1	56190.8	6.56168e-05	6.96589	0.0206085	1.26997e+06	-182.017	30407.6
										Σ	-2.83185e-06
Loop IV	3	0.1524	100	0.154502	1	1.45034e+06	0.000131234	8.59608	0.0135331	1.33433e+07	318518	4.12315e+06
	12	0.1524	100	0.0727097	1	682539	0.000131234	8.35821	0.0143144	1.41136e+07	74614.6	2.0524e+06
	13	0.1524	100	-0.157927	-1	1.48249e+06	0.000131234	8.60151	0.0135161	1.33265e+07	-332374	4.20922e+06
	14	0.4064	100	-0.852371	-1	3.00051e+06	4.92126e-05	9.3505	0.0114375	83628	-60758.8	142564
										Σ	1.32349e-05
Loop V	15	0.1524	200	0.155406	1	1.45883e+06	0.000131234	8.59754	0.0135286	2.66776e+07	644296	8.29176e+06
	9	0.3048	100	-0.031497	-1	147834	6.56168e-05	7.66065	0.01704	525030	-520.863	33073.8
	10	0.1524	100	-0.109275	-1	1.02578e+06	0.000131234	8.49951	0.0138424	1.36483e+07	-162974	2.98283e+06
	11	0.1524	100	-0.175081	-1	1.64351e+06	0.000131234	8.62597	0.0134395	1.3251e+07	-406187	4.64e+06		changed sign (oposite than in previous iteration)
	12	0.1524	100	-0.0727097	-1	682539	0.000131234	8.35821	0.0143144	1.41136e+07	-74614.6	2.0524e+06		stoping criterion (stop when result is 0.00)
										Σ	-2.16455e-06
	Pipe 1	Pipe 2	Pipe 3	Pipe 4	Pipe 5	Pipe 6	Pipe 7	Pipe 8	Pipe 9	Pipe 10	Pipe 11	Pipe 12	Pipe 13	Pipe 14	Pipe 15
Node 1	0	0	-1	-1	0	0	0	0	0	0	0	0	0	-1	0	Node equations			Node 1 - input-consumption	-1.92778	[V]
Node 2	-1	0	0	1	0	0	0	0	0	0	0	0	0	0	0				Node 2 - consumption	0.583333
Node 3	1	-1	0	0	-1	0	0	0	0	0	0	0	0	0	0				Node 3 - consumption	0.0472222
Node 4	0	1	1	0	0	0	0	0	0	0	0	-1	0	0	-1				Node 4 - consumption	0.025
Node 5	0	0	0	0	0	0	0	0	0	0	-1	1	1	0	0				Node 5 - consumption	0.0555556
Node 6	0	0	0	0	0	0	0	0	0	0	0	0	-1	1	0				Node 6 - consumption	0.694444
Node 7	0	0	0	0	1	-1	-1	0	0	0	0	0	0	0	0				Node 7 - consumption	0.0833333
Node 8	0	0	0	0	0	0	1	-1	0	0	0	0	0	0	0				Node 8 - consumption	0.0472222
Node 9	0	0	0	0	0	0	0	1	1	0	0	0	0	0	1				Node 9 - consumption	0.236111
Node 10	0	0	0	0	0	0	0	0	-1	1	0	0	0	0	0				Node 10 - consumption	0.0777778
Loop 1	61184.4	86174.3	-4.12315e+06	660094	0	0	0	0	0	0	0	0	0	0	0	Loop equations			-A₁+(A₂·A₃+A₄·A₅+A₆·A₇+A₈·A₉)	-1.05219e-05
Loop 2	0	-86174.3	0	0	5.0577e+06	30407.6	0	0	0	0	-4.64e+06	-2.0524e+06	0	0	0				-B₁+(B₂·B₃+B₄·B₅+B₆·B₇+B₈·B₉+B10·B11)	-1.33319e-06
Loop 3	0	0	0	0	0	-30407.6	2.65722e+06	1.44526e+06	-33073.8	-2.98283e+06	0	0	0	0	0				-C₁+(C₂·C₃+C₄·C₅+C₆·C₇+C₈·C₉+C10·C11)	-2.83185e-06
Loop 4	0	0	4.12315e+06	0	0	0	0	0	0	0	0	2.0524e+06	-4.20922e+06	-142564	0				-D₁+(D₂·D₃+D₄·D₅+D₆·D₇+D₈·D₉)	1.32349e-05
Loop 5	0	0	0	0	0	0	0	0	-33073.8	-2.98283e+06	-4.64e+06	-2.0524e+06	0	0	8.29176e+06				-E₁+(E₂·E₃+E₄·E₅+E₆·E₇+E₈·E₉+E10·E11)	-2.16467e-06
inv [NL]	-0.676404	-0.880202	0.100907	0.0760093	-0.126961	-0.658404	0.000696758	0.0089352	0.0134161	0.013269	3.08742e-07	1.98135e-08	-3.1004e-09	1.26257e-07	7.54885e-09
	-0.259973	-0.450693	-0.468371	0.498788	0.196546	-0.245017	-0.00215194	0.0547402	0.0856837	0.0847441	2.88928e-07	-9.21801e-08	-2.14104e-08	1.04904e-07	4.9821e-08		final results	[Q]=inv[NL]x[V]
	-0.123759	-0.0033021	0.00786315	0.0237213	-0.018102	-0.120298	7.69109e-05	0.00270715	0.00413773	0.00409235	-1.82485e-07	1.53948e-09	-9.89844e-10	2.42791e-08	2.36182e-09		result [Q]	Q (m3/s)	Q (m3/h)	sign	Pipe	velocity (m/s)
	-0.676404	0.119798	0.100907	0.0760093	-0.126961	-0.658404	0.000696758	0.0089352	0.0134161	0.013269	3.08742e-07	1.98135e-08	-3.1004e-09	1.26257e-07	7.54885e-09			0.337571	1215.26	1	1	2.60236
	-0.416431	-0.42951	-0.430722	-0.422778	-0.323507	-0.413387	0.0028487	-0.045805	-0.0722676	-0.0714751	1.98135e-08	1.11994e-07	1.831e-08	2.1353e-08	-4.22722e-08			0.0986139	355.01	1	2	1.35151
	-0.502677	-0.517803	-0.519205	-0.513106	-0.391954	-0.49905	-0.993028	-0.63271	-0.436733	-0.431944	2.29139e-08	9.36836e-08	-1.35599e-07	2.54432e-08	-9.21072e-09			0.154502	556.208	1	3	8.46984
	0.0862467	0.0882933	0.088483	0.090328	0.0684469	0.0856636	-0.00412326	0.586905	0.364466	0.360469	-3.1004e-09	1.831e-08	1.53909e-07	-4.09024e-09	-3.30615e-08			0.920904	3315.26	1	4	12.621
	0.0862467	0.0882933	0.088483	0.090328	0.0684469	0.0856636	-0.00412326	-0.413095	0.364466	0.360469	-3.1004e-09	1.831e-08	1.53909e-07	-4.09024e-09	-3.30615e-08			0.191735	690.246	1	5	10.5109
	0.122388	0.125325	0.125597	0.128045	0.0970591	0.121559	0.00440334	0.325523	0.50018	-0.494338	-4.44845e-09	2.39622e-08	-1.20848e-07	-5.82042e-09	-4.48801e-08			0.0119718	43.0985	1	6	0.164074
	0.122388	0.125325	0.125597	0.128045	0.0970591	0.121559	0.00440334	0.325523	0.50018	0.505662	-4.44845e-09	2.39622e-08	-1.20848e-07	-5.82042e-09	-4.48801e-08			0.0964298	347.147	1	7	5.2863
	-0.374934	-0.356872	-0.355198	-0.358849	-0.510987	-0.379391	-0.00256862	-0.0417666	-0.0630864	-0.0623946	-2.73624e-08	-6.97214e-08	1.47515e-08	-3.12637e-08	-3.56694e-08			0.0492076	177.147	1	8	2.69757
	-0.175097	-0.240377	-0.246428	-0.259118	0.34395	-0.158093	-0.00179495	-0.0301243	-0.0455326	-0.0450332	9.88945e-08	-4.83684e-08	1.06613e-08	1.19272e-07	-2.57588e-08			0.031497	113.389	1	9	0.431668
	-0.199837	-0.116496	-0.108771	-0.0997306	0.145063	-0.221298	-0.000773669	-0.0116423	-0.0175538	-0.0173613	-1.26257e-07	-2.1353e-08	4.09024e-09	-1.50536e-07	-9.91066e-09			0.109275	393.389	1	10	5.99046
	-0.199837	-0.116496	-0.108771	-0.0997306	0.145063	0.778702	-0.000773669	-0.0116423	-0.0175538	-0.0173613	-1.26257e-07	-2.1353e-08	4.09024e-09	-1.50536e-07	-9.91066e-09			0.175081	630.291	1	11	9.59795
	-0.208635	-0.213618	-0.21408	-0.218373	-0.165506	-0.207222	-0.000280076	0.0875716	0.135354	0.13387	7.54885e-09	-4.22722e-08	-3.30615e-08	9.91066e-09	7.79416e-08			0.0727097	261.755	1	12	3.98596
																		0.157927	568.536	1	13	8.65756
																		0.852371	3068.54	1	14	6.571
																		0.155406	559.463	1	15	8.51941
