# Supplementary material for: An Efficient Iterative Method for Looped Pipe Network Hydraulics
Source: Preprints.org preprint supplement (doi:10.20944/preprints201903.0067.v1), 2019-03-05
Supplement: Supplementary file 2 [file gas DB.xlsx]

## Sheet: iteration 1
	Pipe	D (m)	L (m)	Q (m³/s)	sign (Q)	Q 1.82	Q 0.82	d 4.82	F; (eq 1)	F'; (eq 2)
Loop I	1	0.4064	100	0.0555556	1	0.00519283	0.0934709	0.0130364	114959	3.76606e+06		Inputs
	2	0.3048	100	-0.0694444	-1	0.00779436	0.112239	0.00325801	-690438	1.8095e+07
	3	0.1524	100	-0.566667	-1	0.355677	0.627666	0.000115342	-8.89949e+08	2.85831e+09		relative gas density
	4	0.3048	100	0.638889	1	0.44246	0.692546	0.00325801	3.91939e+07	1.11651e+08		0.6
								Σ	-8.51331e+08
Loop II	5	0.1524	100	0.0777778	1	0.00957981	0.123169	0.000115342	2.39699e+07	5.60895e+08
	6	0.3048	200	-0.0138889	-1	0.000416538	0.0299908	0.00325801	-73795.4	9.67014e+06
	11	0.1524	100	-0.0555556	-1	0.00519283	0.0934709	0.000115342	-1.29931e+07	4.25654e+08
	12	0.1524	100	-0.0833333	-1	0.0108615	0.130338	0.000115342	-2.71768e+07	5.93542e+08
	2	0.3048	100	0.0694444	1	0.00779436	0.112239	0.00325801	690438	1.8095e+07
								Σ	-1.55834e+07
Loop III	7	0.1524	100	0.00833333	1	0.000164396	0.0197275	0.000115342	411338	8.98362e+07
	8	0.1524	100	-0.0388889	-1	0.0027132	0.0697681	0.000115342	-6.78877e+06	3.17715e+08
	9	0.3048	100	0.113889	1	0.0191777	0.168389	0.00325801	1.69879e+06	2.71475e+07
	10	0.1524	100	0.0361111	1	0.00237086	0.0656547	0.000115342	5.93219e+06	2.98982e+08
	6	0.3048	200	0.0138889	1	0.000416538	0.0299908	0.00325801	73795.4	9.67014e+06
								Σ	1.32734e+06
Loop IV	3	0.1524	100	0.566667	1	0.355677	0.627666	0.000115342	8.89949e+08	2.85831e+09
	12	0.1524	100	0.0833333	1	0.0108615	0.130338	0.000115342	2.71768e+07	5.93542e+08
	13	0.1524	100	-0.0277778	-1	0.00147072	0.0529459	0.000115342	-3.67992e+06	2.41108e+08
	14	0.4064	100	-0.722222	-1	0.553071	0.765791	0.0130364	-1.22439e+07	3.08547e+07
								Σ	9.01202e+08
Loop V	15	0.1524	200	0.388889	1	0.17926	0.460953	0.000115342	8.9706e+08	4.19824e+09
	9	0.3048	100	0.113889	1	0.0191777	0.168389	0.00325801	1.69879e+06	2.71475e+07
	10	0.1524	100	0.0361111	1	0.00237086	0.0656547	0.000115342	5.93219e+06	2.98982e+08
	11	0.1524	100	-0.0555556	-1	0.00519283	0.0934709	0.000115342	-1.29931e+07	4.25654e+08		changed sign (oposite than in previous iteration)
	12	0.1524	100	-0.0833333	-1	0.0108615	0.130338	0.000115342	-2.71768e+07	5.93542e+08		stoping criterion (stop when result is 0.00)
								Σ	8.64521e+08
[NL]	Pipe 1	Pipe 2	Pipe 3	Pipe 4	Pipe 5	Pipe 6	Pipe 7	Pipe 8	Pipe 9	Pipe 10	Pipe 11	Pipe 12	Pipe 13	Pipe 14	Pipe 15
Node 1	0	0	-1	-1	0	0	0	0	0	0	0	0	0	-1	0	Node equations			Node 1 - input-consumption	-1.92778	[V]
Node 2	-1	0	0	1	0	0	0	0	0	0	0	0	0	0	0				Node 2 - consumption	0.583333
Node 3	1	1	0	0	-1	0	0	0	0	0	0	0	0	0	0				Node 3 - consumption	0.0472222
Node 4	0	-1	1	0	0	0	0	0	0	0	0	-1	0	0	-1				Node 4 - consumption	0.025
Node 5	0	0	0	0	0	0	0	0	0	0	-1	1	1	0	0				Node 5 - consumption	0.0555556
Node 6	0	0	0	0	0	0	0	0	0	0	0	0	-1	1	0				Node 6 - consumption	0.694444
Node 7	0	0	0	0	1	1	-1	0	0	0	0	0	0	0	0				Node 7 - consumption	0.0833333
Node 8	0	0	0	0	0	0	1	1	0	0	0	0	0	0	0				Node 8 - consumption	0.0472222
Node 9	0	0	0	0	0	0	0	-1	-1	0	0	0	0	0	1				Node 9 - consumption	0.236111
Node 10	0	0	0	0	0	0	0	0	1	-1	0	0	0	0	0				Node 10 - consumption	0.0777778
Loop 1	3.76606e+06	-1.8095e+07	-2.85831e+09	1.11651e+08	0	0	0	0	0	0	0	0	0	0	0	Loop equations			-A₁+(A₂·A₃+A₄·A₅+A₆·A₇+A₈·A₉)	-6.98091e+08
Loop 2	0	1.8095e+07	0	0	5.60895e+08	-9.67014e+06	0	0	0	0	-4.25654e+08	-5.93542e+08	0	0	0				-B₁+(B₂·B₃+B₄·B₅+B₆·B₇+B₈·B₉+B10·B11)	-1.27784e+07
Loop 3	0	0	0	0	0	9.67014e+06	8.98362e+07	-3.17715e+08	2.71475e+07	2.98982e+08	0	0	0	0	0				-C₁+(C₂·C₃+C₄·C₅+C₆·C₇+C₈·C₉+C10·C11)	1.08842e+06
Loop 4	0	0	2.85831e+09	0	0	0	0	0	0	0	0	5.93542e+08	-2.41108e+08	-3.08547e+07	0				-D₁+(D₂·D₃+D₄·D₅+D₆·D₇+D₈·D₉)	7.38986e+08
Loop 5	0	0	0	0	0	0	0	0	2.71475e+07	2.98982e+08	-4.25654e+08	-5.93542e+08	0	0	4.19824e+09				-E₁+(E₂·E₃+E₄·E₅+E₆·E₇+E₈·E₉+E10·E11)	7.08907e+08
inv [NL]	-0.562068	-0.735485	0.258666	0.238758	-0.215851	-0.522789	0.00455338	0.00615448	0.0118169	0.0108333	1.5532e-09	4.53047e-10	-1.78225e-11	1.27303e-09	5.40563e-11
	0.111639	0.234474	0.238617	-0.733884	-0.107112	0.0868217	0.00329198	-0.00381633	-0.0289556	-0.0265453	-1.10016e-09	4.19552e-10	7.91252e-11	-8.04344e-10	-1.67911e-10		final results	[Q]=inv[NL]x[V]
	-0.0234029	0.00787907	0.00893423	0.014287	-0.00803789	-0.0216597	0.000163024	0.000272676	0.000660472	0.000605494	-2.80175e-10	1.56379e-11	-1.22058e-12	5.64965e-11	3.24576e-12		result [Q]	Q (m3/s)	Q (m3/h)	sign	Pipe	velocity (m/s)
	-0.562068	0.264515	0.258666	0.238758	-0.215851	-0.522789	0.00455338	0.00615448	0.0118169	0.0108333	1.5532e-09	4.53047e-10	-1.78225e-11	1.27303e-09	5.40563e-11			0.19094	687.384	1	1	0.367993
	-0.450428	-0.501011	-0.502718	-0.495126	-0.322963	-0.435967	0.00784536	0.00233815	-0.0171386	-0.015712	4.53047e-10	8.726e-10	6.13027e-11	4.68685e-10	-1.13854e-10			0.00931892	33.5481	1	2	0.031929
	0.469929	0.522502	0.524276	0.518115	0.337285	0.45488	0.979328	0.860168	0.438748	0.402226	-4.7087e-10	-8.11297e-10	1.32641e-09	-4.87728e-10	1.8905e-11			0.27467	988.811	1	3	3.76436
	0.0195008	0.0214907	0.0215578	0.0229896	0.0143218	0.0189132	-0.0128266	0.862506	0.421609	0.386514	-1.78225e-11	6.13027e-11	1.38771e-09	-1.9043e-11	-9.49493e-11			0.774273	2787.38	1	4	2.65286
	-0.0195008	-0.0214907	-0.0215578	-0.0229896	-0.0143218	-0.0189132	0.0128266	0.137494	-0.421609	-0.386514	1.78225e-11	-6.13027e-11	-1.38771e-09	1.9043e-11	9.49493e-11			0.153037	550.933	1	5	2.09738
	-0.0383033	-0.0423488	-0.0424853	-0.0440919	-0.0278982	-0.0371228	-0.0130094	-0.129147	-0.539877	0.421822	3.62338e-11	-5.25515e-11	1.29276e-09	3.8259e-11	1.18094e-10			0.0218176	78.5434	1	6	0.0747528
	-0.0383033	-0.0423488	-0.0424853	-0.0440919	-0.0278982	-0.0371228	-0.0130094	-0.129147	-0.539877	-0.578178	3.62338e-11	-5.25515e-11	1.29276e-09	3.8259e-11	1.18094e-10			0.0915211	329.476	1	7	1.2543
	-0.491768	-0.435149	-0.433239	-0.437793	-0.634817	-0.507997	-0.00766254	-0.0106852	-0.0213752	-0.0195959	-5.07104e-10	-7.58745e-10	3.36466e-11	-5.25987e-10	-9.91886e-11		change sing	-0.0442989	-159.476	-1	8	-0.607118
	-0.0772382	-0.162755	-0.165639	-0.184747	0.141294	-0.0524453	-0.00294614	-0.00425807	-0.00889781	-0.00815715	7.65925e-10	-2.9006e-10	1.46035e-11	8.03538e-10	-4.18865e-11			0.00562758	20.2593	1	9	0.0192815
	-0.41453	-0.272394	-0.2676	-0.253045	0.223889	-0.455552	-0.0047164	-0.00642716	-0.0124774	-0.0114388	-1.27303e-09	-4.68685e-10	1.9043e-11	-1.32953e-09	-5.73021e-11		change sing	-0.0721502	-259.741	-1	10	-0.988821
	-0.41453	-0.272394	-0.2676	-0.253045	0.223889	0.544448	-0.0047164	-0.00642716	-0.0124774	-0.0114388	-1.27303e-09	-4.68685e-10	1.9043e-11	-1.32953e-09	-5.73021e-11			0.171746	618.284	1	11	2.35378
	-0.0578041	-0.0638395	-0.0640431	-0.0670815	-0.04222	-0.056036	-0.000182814	0.00834707	0.0385138	0.0353079	5.40563e-11	-1.13854e-10	-9.49493e-11	5.73021e-11	2.13043e-10			0.042911	154.48	1	12	0.588097
																		0.18439	663.805	1	13	2.52707
																		0.878835	3163.8	1	14	1.69375
																		0.19744	710.783	1	15	2.70592

## Sheet: iteration 2
	Pipe	D (m)	L (m)	Q (m³/s)	sign (Q)	Q 1.82	Q 0.82	d 4.82	F; (eq 1)	F'; (eq 2)
Loop I	1	0.4064	100	0.19094	1	0.0491171	0.257238	0.0130364	1.08736e+06	1.03645e+07		Inputs
	2	0.3048	100	-0.00931892	-1	0.000201486	0.0216212	0.00325801	-17848	3.48574e+06
	3	0.1524	100	-0.27467	-1	0.0951997	0.346597	0.000115342	-2.38201e+08	1.57836e+09		relative gas density
	4	0.3048	100	0.774273	1	0.627752	0.810762	0.00325801	5.56073e+07	1.3071e+08		0.6
								Σ	-1.81525e+08
Loop II	5	0.1524	100	0.153037	1	0.0328344	0.214552	0.000115342	8.21557e+07	9.77041e+08
	6	0.3048	200	-0.0218176	-1	0.000947608	0.0434332	0.00325801	-167882	1.40045e+07
	11	0.1524	100	-0.171746	-1	0.0405034	0.235834	0.000115342	-1.01345e+08	1.07396e+09
	12	0.1524	100	-0.042911	-1	0.00324545	0.0756321	0.000115342	-8.12051e+06	3.44418e+08
	2	0.3048	100	0.00931892	1	0.000201486	0.0216212	0.00325801	17848	3.48574e+06
								Σ	-2.74595e+07
Loop III	7	0.1524	100	0.0915211	1	0.0128816	0.14075	0.000115342	3.22313e+07	6.40955e+08
	8	0.1524	100	0.0442989	1	0.00343902	0.0776322	0.000115342	8.60486e+06	3.53527e+08
	9	0.3048	100	0.00562758	1	8.04609e-05	0.0142976	0.00325801	7127.37	2.30504e+06
	10	0.1524	100	-0.0721502	-1	0.00835588	0.115812	0.000115342	-2.09075e+07	5.27394e+08
	6	0.3048	200	0.0218176	1	0.000947608	0.0434332	0.00325801	167882	1.40045e+07
								Σ	2.01037e+07
Loop IV	3	0.1524	100	0.27467	1	0.0951997	0.346597	0.000115342	2.38201e+08	1.57836e+09
	12	0.1524	100	0.042911	1	0.00324545	0.0756321	0.000115342	8.12051e+06	3.44418e+08
	13	0.1524	100	-0.18439	-1	0.0460938	0.24998	0.000115342	-1.15332e+08	1.13837e+09
	14	0.4064	100	-0.878835	-1	0.790517	0.899506	0.0130364	-1.75005e+07	3.62422e+07
								Σ	1.13489e+08
Loop V	15	0.1524	200	0.19744	1	0.0522025	0.264397	0.000115342	2.61234e+08	2.40806e+09
	9	0.3048	100	0.00562758	1	8.04609e-05	0.0142976	0.00325801	7127.37	2.30504e+06
	10	0.1524	100	-0.0721502	-1	0.00835588	0.115812	0.000115342	-2.09075e+07	5.27394e+08
	11	0.1524	100	-0.171746	-1	0.0405034	0.235834	0.000115342	-1.01345e+08	1.07396e+09		changed sign (oposite than in previous iteration)
	12	0.1524	100	-0.042911	-1	0.00324545	0.0756321	0.000115342	-8.12051e+06	3.44418e+08		stoping criterion (stop when result is 0.00)
								Σ	1.30869e+08
[NL]	Pipe 1	Pipe 2	Pipe 3	Pipe 4	Pipe 5	Pipe 6	Pipe 7	Pipe 8	Pipe 9	Pipe 10	Pipe 11	Pipe 12	Pipe 13	Pipe 14	Pipe 15
Node 1	0	0	-1	-1	0	0	0	0	0	0	0	0	0	-1	0	Node equations			Node 1 - input-consumption	-1.92778	[V]
Node 2	-1	0	0	1	0	0	0	0	0	0	0	0	0	0	0				Node 2 - consumption	0.583333
Node 3	1	1	0	0	-1	0	0	0	0	0	0	0	0	0	0				Node 3 - consumption	0.0472222
Node 4	0	-1	1	0	0	0	0	0	0	0	0	-1	0	0	-1				Node 4 - consumption	0.025
Node 5	0	0	0	0	0	0	0	0	0	0	-1	1	1	0	0				Node 5 - consumption	0.0555556
Node 6	0	0	0	0	0	0	0	0	0	0	0	0	-1	1	0				Node 6 - consumption	0.694444
Node 7	0	0	0	0	1	1	-1	0	0	0	0	0	0	0	0				Node 7 - consumption	0.0833333
Node 8	0	0	0	0	0	0	1	-1	0	0	0	0	0	0	0				Node 8 - consumption	0.0472222
Node 9	0	0	0	0	0	0	0	1	-1	0	0	0	0	0	1				Node 9 - consumption	0.236111
Node 10	0	0	0	0	0	0	0	0	1	1	0	0	0	0	0				Node 10 - consumption	0.0777778
Loop 1	1.03645e+07	-3.48574e+06	-1.57836e+09	1.3071e+08	0	0	0	0	0	0	0	0	0	0	0	Loop equations			-A₁+(A₂·A₃+A₄·A₅+A₆·A₇+A₈·A₉)	-1.4885e+08
Loop 2	0	3.48574e+06	0	0	9.77041e+08	-1.40045e+07	0	0	0	0	-1.07396e+09	-3.44418e+08	0	0	0				-B₁+(B₂·B₃+B₄·B₅+B₆·B₇+B₈·B₉+B10·B11)	-2.25168e+07
Loop 3	0	0	0	0	0	1.40045e+07	6.40955e+08	3.53527e+08	2.30504e+06	-5.27394e+08	0	0	0	0	0				-C₁+(C₂·C₃+C₄·C₅+C₆·C₇+C₈·C₉+C10·C11)	1.6485e+07
Loop 4	0	0	1.57836e+09	0	0	0	0	0	0	0	0	3.44418e+08	-1.13837e+09	-3.62422e+07	0				-D₁+(D₂·D₃+D₄·D₅+D₆·D₇+D₈·D₉)	9.3061e+07
Loop 5	0	0	0	0	0	0	0	0	2.30504e+06	-5.27394e+08	-1.07396e+09	-3.44418e+08	0	0	2.40806e+09				-E₁+(E₂·E₃+E₄·E₅+E₆·E₇+E₈·E₉+E10·E11)	1.07312e+08
inv [NL]	-0.774765	-0.919418	0.0691116	0.0654968	-0.100177	-0.753951	0.00108031	0.00589384	0.00854881	0.00851161	1.10667e-09	6.963e-11	-7.50994e-12	5.74305e-10	2.36489e-11
	0.306708	0.44226	0.453008	-0.54178	-0.27997	0.288606	0.00540519	-0.0408458	-0.066356	-0.0660673	-1.03704e-09	4.58121e-10	7.21594e-11	-4.99463e-10	-1.97431e-10		final results	[Q]=inv[NL]x[V]
	-0.0699264	-0.000340887	0.00517679	0.00705065	-0.00833562	-0.068026	8.46212e-05	0.000617002	0.000910643	0.00090668	-5.32365e-10	5.21183e-12	-8.30605e-13	5.24348e-11	2.54978e-12		result [Q]	Q (m3/s)	Q (m3/h)	sign	Pipe	velocity (m/s)
	-0.774765	0.0805817	0.0691116	0.0654968	-0.100177	-0.753951	0.00108031	0.00589384	0.00854881	0.00851161	1.10667e-09	6.963e-11	-7.50994e-12	5.74305e-10	2.36489e-11			0.325619	1172.23	1	1	0.627556
	-0.468057	-0.477159	-0.47788	-0.476283	-0.380147	-0.465345	0.0064855	-0.0349519	-0.0578072	-0.0575557	6.963e-11	5.27751e-10	6.46495e-11	7.48418e-11	-1.73782e-10		change sing	-0.0852793	-307.005	-1	2	-0.292189
	0.521448	0.531531	0.532331	0.530985	0.423741	0.518433	0.9848	0.585935	0.365936	0.364344	-7.71399e-11	-4.63101e-10	6.22297e-10	-8.31823e-11	6.85404e-11			0.171908	618.868	1	3	2.356
	0.0533908	0.0543724	0.0544502	0.0547018	0.0435938	0.0530885	-0.00871496	0.550983	0.308129	0.306788	-7.50994e-12	6.46495e-11	6.86947e-10	-8.34055e-12	-1.05241e-10			0.908952	3272.23	1	4	3.11431
	0.0533908	0.0543724	0.0544502	0.0547018	0.0435938	0.0530885	-0.00871496	-0.449017	0.308129	0.306788	-7.50994e-12	6.46495e-11	6.86947e-10	-8.34055e-12	-1.05241e-10			0.193117	695.222	1	5	2.64668
	-0.114025	-0.116134	-0.116302	-0.116738	-0.0930483	-0.113378	-0.00967483	-0.382522	-0.588171	0.410037	1.6139e-11	-1.09132e-10	5.81706e-10	1.78582e-11	1.95773e-10		change sing	-0.0169417	-60.9901	-1	6	-0.0580466
	0.114025	0.116134	0.116302	0.116738	0.0930483	0.113378	0.00967483	0.382522	0.588171	0.589963	-1.6139e-11	1.09132e-10	-5.81706e-10	-1.78582e-11	-1.95773e-10			0.0928423	334.232	1	7	1.27241
	-0.364527	-0.352335	-0.351368	-0.352277	-0.483211	-0.368189	-0.00552562	-0.0315432	-0.0458935	-0.0456938	-9.32789e-11	-3.53969e-10	4.05918e-11	-1.01041e-10	-1.27233e-10			0.0456201	164.232	1	8	0.625225
	-0.209219	-0.272094	-0.277079	-0.279729	0.408276	-0.190166	-0.0043607	-0.0250323	-0.036434	-0.0362755	4.81026e-10	-2.79127e-10	3.22513e-11	5.25699e-10	-1.01034e-10		change sing	-0.0337812	-121.612	-1	9	-0.115743
	-0.155308	-0.0802408	-0.0742884	-0.0725474	0.108513	-0.178023	-0.00116493	-0.00651084	-0.00945945	-0.00941829	-5.74305e-10	-7.48418e-11	8.34055e-12	-6.2674e-10	-2.61987e-11			0.111559	401.612	1	10	1.52892
	-0.155308	-0.0802408	-0.0742884	-0.0725474	0.108513	0.821977	-0.00116493	-0.00651084	-0.00945945	-0.00941829	-5.74305e-10	-7.48418e-11	8.34055e-12	-6.2674e-10	-2.61987e-11			0.172395	620.622	1	11	2.36268
	-0.167416	-0.170507	-0.170752	-0.17144	-0.136642	-0.166466	-0.000959874	0.0664951	0.103701	0.103249	2.36489e-11	-1.73782e-10	-1.05241e-10	2.61987e-11	3.01014e-10			0.0754771	271.717	1	12	1.03442
																		0.152474	548.905	1	13	2.08966
																		0.846918	3048.9	1	14	1.63224
																		0.15671	564.155	1	15	2.14771

## Sheet: iteration 3
	Pipe	D (m)	L (m)	Q (m³/s)	sign (Q)	Q 1.82	Q 0.82	d 4.82	F; (eq 1)	F'; (eq 2)
Loop I	1	0.4064	100	0.325619	1	0.129757	0.398494	0.0130364	2.87257e+06	1.60558e+07		Inputs
	2	0.3048	100	0.0852793	1	0.0113275	0.132829	0.00325801	1.00341e+06	2.14145e+07
	3	0.1524	100	-0.171908	-1	0.040573	0.236016	0.000115342	-1.01519e+08	1.07479e+09		relative gas density
	4	0.3048	100	0.908952	1	0.840513	0.924706	0.00325801	7.44541e+07	1.4908e+08		0.6
								Σ	-2.31886e+07
Loop II	5	0.1524	100	0.193117	1	0.0501412	0.259641	0.000115342	1.25459e+08	1.18237e+09
	6	0.3048	200	0.0169417	1	0.000598	0.0352976	0.00325801	105944	1.13813e+07
	11	0.1524	100	-0.172395	-1	0.0407826	0.236565	0.000115342	-1.02043e+08	1.07728e+09
	12	0.1524	100	-0.0754771	-1	0.00907033	0.120173	0.000115342	-2.26951e+07	5.47253e+08
	2	0.3048	100	-0.0852793	-1	0.0113275	0.132829	0.00325801	-1.00341e+06	2.14145e+07
								Σ	-176283
Loop III	7	0.1524	100	0.0928423	1	0.013222	0.142414	0.000115342	3.30831e+07	6.48533e+08
	8	0.1524	100	0.0456201	1	0.00362797	0.0795258	0.000115342	9.07763e+06	3.6215e+08
	9	0.3048	100	-0.0337812	-1	0.00209985	0.0621604	0.00325801	-186009	1.00214e+07
	10	0.1524	100	-0.111559	-1	0.0184696	0.165559	0.000115342	-4.62133e+07	7.53935e+08
	6	0.3048	200	-0.0169417	-1	0.000598	0.0352976	0.00325801	-105944	1.13813e+07
								Σ	-4.34452e+06
Loop IV	3	0.1524	100	0.171908	1	0.040573	0.236016	0.000115342	1.01519e+08	1.07479e+09
	12	0.1524	100	0.0754771	1	0.00907033	0.120173	0.000115342	2.26951e+07	5.47253e+08
	13	0.1524	100	-0.152474	-1	0.0326148	0.213904	0.000115342	-8.16061e+07	9.74091e+08
	14	0.4064	100	-0.846918	-1	0.739046	0.87263	0.0130364	-1.6361e+07	3.51593e+07
								Σ	2.62466e+07
Loop V	15	0.1524	200	0.15671	1	0.0342827	0.218766	0.000115342	1.71559e+08	1.99246e+09
	9	0.3048	100	-0.0337812	-1	0.00209985	0.0621604	0.00325801	-186009	1.00214e+07
	10	0.1524	100	-0.111559	-1	0.0184696	0.165559	0.000115342	-4.62133e+07	7.53935e+08
	11	0.1524	100	-0.172395	-1	0.0407826	0.236565	0.000115342	-1.02043e+08	1.07728e+09		changed sign (oposite than in previous iteration)
	12	0.1524	100	-0.0754771	-1	0.00907033	0.120173	0.000115342	-2.26951e+07	5.47253e+08		stoping criterion (stop when result is 0.00)
								Σ	421567
[NL]	Pipe 1	Pipe 2	Pipe 3	Pipe 4	Pipe 5	Pipe 6	Pipe 7	Pipe 8	Pipe 9	Pipe 10	Pipe 11	Pipe 12	Pipe 13	Pipe 14	Pipe 15
Node 1	0	0	-1	-1	0	0	0	0	0	0	0	0	0	-1	0	Node equations			Node 1 - input-consumption	-1.92778	[V]
Node 2	-1	0	0	1	0	0	0	0	0	0	0	0	0	0	0				Node 2 - consumption	0.583333
Node 3	1	-1	0	0	-1	0	0	0	0	0	0	0	0	0	0				Node 3 - consumption	0.0472222
Node 4	0	1	1	0	0	0	0	0	0	0	0	-1	0	0	-1				Node 4 - consumption	0.025
Node 5	0	0	0	0	0	0	0	0	0	0	-1	1	1	0	0				Node 5 - consumption	0.0555556
Node 6	0	0	0	0	0	0	0	0	0	0	0	0	-1	1	0				Node 6 - consumption	0.694444
Node 7	0	0	0	0	1	-1	-1	0	0	0	0	0	0	0	0				Node 7 - consumption	0.0833333
Node 8	0	0	0	0	0	0	1	-1	0	0	0	0	0	0	0				Node 8 - consumption	0.0472222
Node 9	0	0	0	0	0	0	0	1	1	0	0	0	0	0	1				Node 9 - consumption	0.236111
Node 10	0	0	0	0	0	0	0	0	-1	1	0	0	0	0	0				Node 10 - consumption	0.0777778
Loop 1	1.60558e+07	2.14145e+07	-1.07479e+09	1.4908e+08	0	0	0	0	0	0	0	0	0	0	0	Loop equations			-A₁+(A₂·A₃+A₄·A₅+A₆·A₇+A₈·A₉)	-1.90146e+07
Loop 2	0	-2.14145e+07	0	0	1.18237e+09	1.13813e+07	0	0	0	0	-1.07728e+09	-5.47253e+08	0	0	0				-B₁+(B₂·B₃+B₄·B₅+B₆·B₇+B₈·B₉+B10·B11)	-144552
Loop 3	0	0	0	0	0	-1.13813e+07	6.48533e+08	3.6215e+08	-1.00214e+07	-7.53935e+08	0	0	0	0	0				-C₁+(C₂·C₃+C₄·C₅+C₆·C₇+C₈·C₉+C10·C11)	-3.56251e+06
Loop 4	0	0	1.07479e+09	0	0	0	0	0	0	0	0	5.47253e+08	-9.74091e+08	-3.51593e+07	0				-D₁+(D₂·D₃+D₄·D₅+D₆·D₇+D₈·D₉)	2.15222e+07
Loop 5	0	0	0	0	0	0	0	0	-1.00214e+07	-7.53935e+08	-1.07728e+09	-5.47253e+08	0	0	1.99246e+09				-E₁+(E₂·E₃+E₄·E₅+E₆·E₇+E₈·E₉+E10·E11)	345685
inv [NL]	-0.681862	-0.868714	0.111162	0.086313	-0.138237	-0.662924	0.00122354	0.0106424	0.015902	0.0156934	1.25337e-09	9.29814e-11	-1.45234e-11	5.38642e-10	3.53387e-11
	-0.261637	-0.434627	-0.453258	0.513743	0.181382	-0.246203	-0.00327078	0.0571704	0.0909217	0.089729	1.16038e-09	-3.8058e-10	-9.31969e-11	4.38958e-10	2.12211e-10		final results	[Q]=inv[NL]x[V]
	-0.109978	-0.00342686	0.00804862	0.0234976	-0.0176256	-0.106761	0.000122822	0.00277424	0.00425483	0.00419902	-7.14724e-10	6.70331e-12	-4.08833e-12	9.15058e-11	9.6578e-12		result [Q]	Q (m3/s)	Q (m3/h)	sign	Pipe	velocity (m/s)
	-0.681862	0.131286	0.111162	0.086313	-0.138237	-0.662924	0.00122354	0.0106424	0.015902	0.0156934	1.25337e-09	9.29814e-11	-1.45234e-11	5.38642e-10	3.53387e-11			0.340483	1225.74	1	1	0.656204
	-0.420226	-0.434087	-0.43558	-0.42743	-0.319619	-0.416721	0.00449432	-0.046528	-0.0750196	-0.0740355	9.29814e-11	4.73562e-10	7.86735e-11	9.96847e-11	-1.76872e-10			0.100104	360.376	1	2	0.342983
	-0.504686	-0.520713	-0.522439	-0.516285	-0.385295	-0.500527	-0.989343	-0.638188	-0.442098	-0.436299	1.07505e-10	3.94888e-10	-5.41461e-10	1.18296e-10	-3.72339e-11			0.152912	550.483	1	3	2.09566
	0.0844604	0.0866256	0.0868588	0.0888545	0.0656766	0.0838061	-0.00616251	0.59166	0.367078	0.362263	-1.45234e-11	7.86735e-11	6.20135e-10	-1.86117e-11	-1.39638e-10			0.923817	3325.74	1	4	3.16524
	0.0844604	0.0866256	0.0868588	0.0888545	0.0656766	0.0838061	-0.00616251	-0.40834	0.367078	0.362263	-1.45234e-11	7.86735e-11	6.20135e-10	-1.86117e-11	-1.39638e-10			0.193157	695.365	1	5	2.64722
	0.119256	0.122359	0.122694	0.125242	0.0926274	0.118329	0.00658628	0.318204	0.492215	-0.501124	-2.08154e-11	9.81988e-11	-4.80496e-10	-2.63848e-11	-1.84181e-10			0.0140626	50.6254	1	6	0.0481822
	0.119256	0.122359	0.122694	0.125242	0.0926274	0.118329	0.00658628	0.318204	0.492215	0.498876	-2.08154e-11	9.81988e-11	-4.80496e-10	-2.63848e-11	-1.84181e-10			0.0957609	344.739	1	7	1.31241
	-0.376057	-0.356928	-0.354867	-0.358473	-0.522077	-0.381144	-0.00407055	-0.0436083	-0.0656867	-0.0648251	-1.2832e-10	-2.96689e-10	6.09649e-11	-1.44681e-10	-1.46947e-10			0.0485387	174.739	1	8	0.665225
	-0.167898	-0.229069	-0.235657	-0.248662	0.32206	-0.150829	-0.00272419	-0.0301916	-0.0455299	-0.0449326	4.10322e-10	-1.97005e-10	4.23532e-11	4.85467e-10	-1.01951e-10			0.0319985	115.194	1	9	0.109635
	-0.20816	-0.127859	-0.119211	-0.109811	0.155863	-0.230315	-0.00134636	-0.0134166	-0.0201569	-0.0198925	-5.38642e-10	-9.96847e-11	1.86117e-11	-6.30148e-10	-4.49965e-11			0.109776	395.194	1	10	1.50449
	-0.20816	-0.127859	-0.119211	-0.109811	0.155863	0.769685	-0.00134636	-0.0134166	-0.0201569	-0.0198925	-5.38642e-10	-9.96847e-11	1.86117e-11	-6.30148e-10	-4.49965e-11			0.173491	624.569	1	11	2.37771
	-0.203717	-0.208985	-0.209552	-0.214097	-0.158304	-0.202135	-0.000423769	0.0901363	0.140706	0.138861	3.53387e-11	-1.76872e-10	-1.39638e-10	4.49965e-11	3.2382e-10			0.0724422	260.792	1	12	0.992824
																		0.156605	563.777	1	13	2.14627
																		0.851049	3063.78	1	14	1.6402
																		0.155574	560.066	1	15	2.13215

## Sheet: iteration 4
	Pipe	D (m)	L (m)	Q (m³/s)	sign (Q)	Q 1.82	Q 0.82	d 4.82	F; (eq 1)	F'; (eq 2)
Loop I	1	0.4064	100	0.340483	1	0.140739	0.413351	0.0130364	3.11569e+06	1.66544e+07		Inputs
	2	0.3048	100	0.100104	1	0.0151644	0.151486	0.00325801	1.34329e+06	2.44223e+07
	3	0.1524	100	-0.152912	-1	0.0327856	0.214408	0.000115342	-8.20336e+07	9.76387e+08		relative gas density
	4	0.3048	100	0.923817	1	0.865698	0.937088	0.00325801	7.6685e+07	1.51076e+08		0.6
								Σ	-889607
Loop II	5	0.1524	100	0.193157	1	0.0501599	0.259685	0.000115342	1.25506e+08	1.18257e+09
	6	0.3048	200	0.0140626	1	0.000426069	0.030298	0.00325801	75483.9	9.76922e+06
	11	0.1524	100	-0.173491	-1	0.0412559	0.237798	0.000115342	-1.03227e+08	1.0829e+09
	12	0.1524	100	-0.0724422	-1	0.00841754	0.116197	0.000115342	-2.10617e+07	5.29144e+08
	2	0.3048	100	-0.100104	-1	0.0151644	0.151486	0.00325801	-1.34329e+06	2.44223e+07
								Σ	-50616
Loop III	7	0.1524	100	0.0957609	1	0.0139882	0.146075	0.000115342	3.50003e+07	6.65204e+08
	8	0.1524	100	0.0485387	1	0.00406145	0.0836744	0.000115342	1.01622e+07	3.81042e+08
	9	0.3048	100	-0.0319985	-1	0.00190255	0.0594574	0.00325801	-168531	9.58565e+06
	10	0.1524	100	-0.109776	-1	0.017936	0.163387	0.000115342	-4.48781e+07	7.44041e+08
	6	0.3048	200	-0.0140626	-1	0.000426069	0.030298	0.00325801	-75483.9	9.76922e+06
								Σ	40461.9
Loop IV	3	0.1524	100	0.152912	1	0.0327856	0.214408	0.000115342	8.20336e+07	9.76387e+08
	12	0.1524	100	0.0724422	1	0.00841754	0.116197	0.000115342	2.10617e+07	5.29144e+08
	13	0.1524	100	-0.156605	-1	0.0342409	0.218645	0.000115342	-8.56749e+07	9.95681e+08
	14	0.4064	100	-0.851049	-1	0.74562	0.876118	0.0130364	-1.65066e+07	3.52999e+07
								Σ	913834
Loop V	15	0.1524	200	0.155574	1	0.0338318	0.217464	0.000115342	1.69303e+08	1.98061e+09
	9	0.3048	100	-0.0319985	-1	0.00190255	0.0594574	0.00325801	-168531	9.58565e+06
	10	0.1524	100	-0.109776	-1	0.017936	0.163387	0.000115342	-4.48781e+07	7.44041e+08
	11	0.1524	100	-0.173491	-1	0.0412559	0.237798	0.000115342	-1.03227e+08	1.0829e+09		changed sign (oposite than in previous iteration)
	12	0.1524	100	-0.0724422	-1	0.00841754	0.116197	0.000115342	-2.10617e+07	5.29144e+08		stoping criterion (stop when result is 0.00)
								Σ	-32998.1
[NL]	Pipe 1	Pipe 2	Pipe 3	Pipe 4	Pipe 5	Pipe 6	Pipe 7	Pipe 8	Pipe 9	Pipe 10	Pipe 11	Pipe 12	Pipe 13	Pipe 14	Pipe 15
Node 1	0	0	-1	-1	0	0	0	0	0	0	0	0	0	-1	0	Node equations			Node 1 - input-consumption	-1.92778	[V]
Node 2	-1	0	0	1	0	0	0	0	0	0	0	0	0	0	0				Node 2 - consumption	0.583333
Node 3	1	-1	0	0	-1	0	0	0	0	0	0	0	0	0	0				Node 3 - consumption	0.0472222
Node 4	0	1	1	0	0	0	0	0	0	0	0	-1	0	0	-1				Node 4 - consumption	0.025
Node 5	0	0	0	0	0	0	0	0	0	0	-1	1	1	0	0				Node 5 - consumption	0.0555556
Node 6	0	0	0	0	0	0	0	0	0	0	0	0	-1	1	0				Node 6 - consumption	0.694444
Node 7	0	0	0	0	1	-1	-1	0	0	0	0	0	0	0	0				Node 7 - consumption	0.0833333
Node 8	0	0	0	0	0	0	1	-1	0	0	0	0	0	0	0				Node 8 - consumption	0.0472222
Node 9	0	0	0	0	0	0	0	1	1	0	0	0	0	0	1				Node 9 - consumption	0.236111
Node 10	0	0	0	0	0	0	0	0	-1	1	0	0	0	0	0				Node 10 - consumption	0.0777778
Loop 1	1.66544e+07	2.44223e+07	-9.76387e+08	1.51076e+08	0	0	0	0	0	0	0	0	0	0	0	Loop equations			-A₁+(A₂·A₃+A₄·A₅+A₆·A₇+A₈·A₉)	-729478
Loop 2	0	-2.44223e+07	0	0	1.18257e+09	9.76922e+06	0	0	0	0	-1.0829e+09	-5.29144e+08	0	0	0				-B₁+(B₂·B₃+B₄·B₅+B₆·B₇+B₈·B₉+B10·B11)	-41505.1
Loop 3	0	0	0	0	0	-9.76922e+06	6.65204e+08	3.81042e+08	-9.58565e+06	-7.44041e+08	0	0	0	0	0				-C₁+(C₂·C₃+C₄·C₅+C₆·C₇+C₈·C₉+C10·C11)	33178.8
Loop 4	0	0	9.76387e+08	0	0	0	0	0	0	0	0	5.29144e+08	-9.95681e+08	-3.52999e+07	0				-D₁+(D₂·D₃+D₄·D₅+D₆·D₇+D₈·D₉)	749344
Loop 5	0	0	0	0	0	0	0	0	-9.58565e+06	-7.44041e+08	-1.0829e+09	-5.29144e+08	0	0	1.98061e+09				-E₁+(E₂·E₃+E₄·E₅+E₆·E₇+E₈·E₉+E10·E11)	-27058.4
inv [NL]	-0.674266	-0.870058	0.108359	0.0789246	-0.133444	-0.655749	0.00101403	0.0096791	0.0146426	0.0144564	1.29598e-09	9.07723e-11	-1.30262e-11	5.24571e-10	3.24557e-11
	-0.253417	-0.435495	-0.455567	0.50565	0.187617	-0.238316	-0.00286701	0.05656	0.090601	0.0894486	1.20521e-09	-3.8281e-10	-8.93366e-11	4.27781e-10	2.09557e-10		final results	[Q]=inv[NL]x[V]
	-0.122169	-0.00562781	0.00721952	0.026206	-0.018231	-0.11861	0.000102485	0.00307748	0.00478161	0.00472079	-7.71406e-10	6.01828e-12	-4.4723e-12	1.00815e-10	1.08171e-11		result [Q]	Q (m3/s)	Q (m3/h)	sign	Pipe	velocity (m/s)
	-0.674266	0.129942	0.108359	0.0789246	-0.133444	-0.655749	0.00101403	0.0096791	0.0146426	0.0144564	1.29598e-09	9.07723e-11	-1.30262e-11	5.24571e-10	3.24557e-11			0.341163	1228.19	1	1	0.657514
	-0.420849	-0.434563	-0.436075	-0.426726	-0.32106	-0.417433	0.00388104	-0.0468809	-0.0759584	-0.0749922	9.07723e-11	4.73583e-10	7.63104e-11	9.67906e-11	-1.77101e-10			0.100777	362.796	1	2	0.345287
	-0.503696	-0.519377	-0.521106	-0.513939	-0.385866	-0.499661	-0.990908	-0.636089	-0.432842	-0.427336	1.03798e-10	3.97272e-10	-5.33399e-10	1.14289e-10	-4.09456e-11			0.152134	547.684	1	3	2.08501
	0.0828465	0.0848145	0.0850314	0.0872132	0.0648059	0.0822288	-0.00521089	0.589208	0.356883	0.352344	-1.30262e-11	7.63104e-11	6.0971e-10	-1.74985e-11	-1.36155e-10			0.924496	3328.19	1	4	3.16756
	0.0828465	0.0848145	0.0850314	0.0872132	0.0648059	0.0822288	-0.00521089	-0.410792	0.356883	0.352344	-1.30262e-11	7.63104e-11	6.0971e-10	-1.74985e-11	-1.36155e-10			0.193164	695.391	1	5	2.64732
	0.121544	0.124479	0.124803	0.127739	0.0949708	0.120634	0.0056109	0.320621	0.501065	-0.492589	-1.94295e-11	1.0079e-10	-4.73554e-10	-2.57743e-11	-1.88491e-10			0.0140909	50.7271	1	6	0.0482789
	0.121544	0.124479	0.124803	0.127739	0.0949708	0.120634	0.0056109	0.320621	0.501065	0.507411	-1.94295e-11	1.0079e-10	-4.73554e-10	-2.57743e-11	-1.88491e-10			0.09574	344.664	1	7	1.31212
	-0.374761	-0.356144	-0.354091	-0.358323	-0.519163	-0.379705	-0.00348103	-0.04329	-0.0660934	-0.0652528	-1.23228e-10	-2.96482e-10	5.98448e-11	-1.40063e-10	-1.47545e-10			0.0485178	174.664	1	8	0.664938
	-0.171196	-0.231829	-0.238513	-0.253192	0.329162	-0.154064	-0.00236452	-0.0305335	-0.0466692	-0.0460756	4.01343e-10	-1.99691e-10	4.23464e-11	4.85322e-10	-1.04272e-10			0.0320228	115.282	1	9	0.109718
	-0.203565	-0.124314	-0.115578	-0.105131	0.151675	-0.225641	-0.00111651	-0.0127566	-0.0194242	-0.0191772	-5.24571e-10	-9.67906e-11	1.74985e-11	-6.25386e-10	-4.32728e-11			0.109801	395.282	1	10	1.50482
	-0.203565	-0.124314	-0.115578	-0.105131	0.151675	0.774359	-0.00111651	-0.0127566	-0.0194242	-0.0191772	-5.24571e-10	-9.67906e-11	1.74985e-11	-6.25386e-10	-4.32728e-11			0.173487	624.555	1	11	2.37765
	-0.20439	-0.209293	-0.209834	-0.214952	-0.159777	-0.202863	-0.000400006	0.090171	0.142052	0.140245	3.24557e-11	-1.77101e-10	-1.36155e-10	4.32728e-11	3.24646e-10			0.0723405	260.426	1	12	0.991429
																		0.156703	564.129	1	13	2.14761
																		0.851147	3064.13	1	14	1.64039
																		0.155571	560.054	1	15	2.1321

## Sheet: iteration 5
	Pipe	D (m)	L (m)	Q (m³/s)	sign (Q)	Q 1.82	Q 0.82	d 4.82	F; (eq 1)	F'; (eq 2)
Loop I	1	0.4064	100	0.341163	1	0.141251	0.414027	0.0130364	3.12702e+06	1.66817e+07		Inputs
	2	0.3048	100	0.100777	1	0.0153503	0.152319	0.00325801	1.35975e+06	2.45568e+07
	3	0.1524	100	-0.152134	-1	0.0324828	0.213514	0.000115342	-8.1276e+07	9.72314e+08		relative gas density
	4	0.3048	100	0.924496	1	0.866857	0.937653	0.00325801	7.67877e+07	1.51167e+08		0.6
								Σ	-1497.75
Loop II	5	0.1524	100	0.193164	1	0.0501634	0.259693	0.000115342	1.25515e+08	1.18261e+09
	6	0.3048	200	0.0140909	1	0.000427628	0.0303479	0.00325801	75760	9.7853e+06
	11	0.1524	100	-0.173487	-1	0.0412542	0.237793	0.000115342	-1.03223e+08	1.08288e+09
	12	0.1524	100	-0.0723405	-1	0.00839604	0.116063	0.000115342	-2.10079e+07	5.28534e+08
	2	0.3048	100	-0.100777	-1	0.0153503	0.152319	0.00325801	-1.35975e+06	2.45568e+07
								Σ	-75.8767
Loop III	7	0.1524	100	0.09574	1	0.0139827	0.146048	0.000115342	3.49864e+07	6.65085e+08
	8	0.1524	100	0.0485178	1	0.00405826	0.0836448	0.000115342	1.01543e+07	3.80907e+08
	9	0.3048	100	-0.0320228	-1	0.00190518	0.0594944	0.00325801	-168764	9.59162e+06
	10	0.1524	100	-0.109801	-1	0.0179432	0.163416	0.000115342	-4.48961e+07	7.44176e+08
	6	0.3048	200	-0.0140909	-1	0.000427628	0.0303479	0.00325801	-75760	9.7853e+06
								Σ	0.707364
Loop IV	3	0.1524	100	0.152134	1	0.0324828	0.213514	0.000115342	8.1276e+07	9.72314e+08
	12	0.1524	100	0.0723405	1	0.00839604	0.116063	0.000115342	2.10079e+07	5.28534e+08
	13	0.1524	100	-0.156703	-1	0.0342798	0.218757	0.000115342	-8.57723e+07	9.96191e+08
	14	0.4064	100	-0.851147	-1	0.745776	0.876201	0.0130364	-1.651e+07	3.53032e+07
								Σ	1589.1
Loop V	15	0.1524	200	0.155571	1	0.0338304	0.21746	0.000115342	1.69296e+08	1.98057e+09
	9	0.3048	100	-0.0320228	-1	0.00190518	0.0594944	0.00325801	-168764	9.59162e+06
	10	0.1524	100	-0.109801	-1	0.0179432	0.163416	0.000115342	-4.48961e+07	7.44176e+08
	11	0.1524	100	-0.173487	-1	0.0412542	0.237793	0.000115342	-1.03223e+08	1.08288e+09		changed sign (oposite than in previous iteration)
	12	0.1524	100	-0.0723405	-1	0.00839604	0.116063	0.000115342	-2.10079e+07	5.28534e+08		stoping criterion (stop when result is 0.00)
								Σ	-32.6881
[NL]	Pipe 1	Pipe 2	Pipe 3	Pipe 4	Pipe 5	Pipe 6	Pipe 7	Pipe 8	Pipe 9	Pipe 10	Pipe 11	Pipe 12	Pipe 13	Pipe 14	Pipe 15
Node 1	0	0	-1	-1	0	0	0	0	0	0	0	0	0	-1	0	Node equations			Node 1 - input-consumption	-1.92778	[V]
Node 2	-1	0	0	1	0	0	0	0	0	0	0	0	0	0	0				Node 2 - consumption	0.583333
Node 3	1	-1	0	0	-1	0	0	0	0	0	0	0	0	0	0				Node 3 - consumption	0.0472222
Node 4	0	1	1	0	0	0	0	0	0	0	0	-1	0	0	-1				Node 4 - consumption	0.025
Node 5	0	0	0	0	0	0	0	0	0	0	-1	1	1	0	0				Node 5 - consumption	0.0555556
Node 6	0	0	0	0	0	0	0	0	0	0	0	0	-1	1	0				Node 6 - consumption	0.694444
Node 7	0	0	0	0	1	-1	-1	0	0	0	0	0	0	0	0				Node 7 - consumption	0.0833333
Node 8	0	0	0	0	0	0	1	-1	0	0	0	0	0	0	0				Node 8 - consumption	0.0472222
Node 9	0	0	0	0	0	0	0	1	1	0	0	0	0	0	1				Node 9 - consumption	0.236111
Node 10	0	0	0	0	0	0	0	0	-1	1	0	0	0	0	0				Node 10 - consumption	0.0777778
Loop 1	1.66817e+07	2.45568e+07	-9.72314e+08	1.51167e+08	0	0	0	0	0	0	0	0	0	0	0	Loop equations			-A₁+(A₂·A₃+A₄·A₅+A₆·A₇+A₈·A₉)	-1228.16
Loop 2	0	-2.45568e+07	0	0	1.18261e+09	9.7853e+06	0	0	0	0	-1.08288e+09	-5.28534e+08	0	0	0				-B₁+(B₂·B₃+B₄·B₅+B₆·B₇+B₈·B₉+B10·B11)	-62.2189
Loop 3	0	0	0	0	0	-9.7853e+06	6.65085e+08	3.80907e+08	-9.59162e+06	-7.44176e+08	0	0	0	0	0				-C₁+(C₂·C₃+C₄·C₅+C₆·C₇+C₈·C₉+C10·C11)	0.580038
Loop 4	0	0	9.72314e+08	0	0	0	0	0	0	0	0	5.28534e+08	-9.96191e+08	-3.53032e+07	0				-D₁+(D₂·D₃+D₄·D₅+D₆·D₇+D₈·D₉)	1303.06
Loop 5	0	0	0	0	0	0	0	0	-9.59162e+06	-7.44176e+08	-1.08288e+09	-5.28534e+08	0	0	1.98057e+09				-E₁+(E₂·E₃+E₄·E₅+E₆·E₇+E₈·E₉+E10·E11)	-26.8043
inv [NL]	-0.67383	-0.870041	0.108307	0.0786607	-0.133272	-0.655329	0.00101482	0.00964995	0.0145955	0.0144097	1.29797e-09	9.0725e-11	-1.29835e-11	5.24054e-10	3.23468e-11
	-0.252997	-0.435493	-0.455632	0.505321	0.187798	-0.23791	-0.0028724	0.0565238	0.0905411	0.089389	1.20725e-09	-3.82849e-10	-8.93062e-11	4.27336e-10	2.09424e-10		final results	[Q]=inv[NL]x[V]
	-0.122712	-0.00572086	0.00718939	0.0263414	-0.0182635	-0.119137	0.000102641	0.00309342	0.0048063	0.00474514	-7.73918e-10	5.99248e-12	-4.49684e-12	1.01259e-10	1.08732e-11		result [Q]	Q (m3/s)	Q (m3/h)	sign	Pipe	velocity (m/s)
	-0.67383	0.129959	0.108307	0.0786607	-0.133272	-0.655329	0.00101482	0.00964995	0.0145955	0.0144097	1.29797e-09	9.0725e-11	-1.29835e-11	5.24054e-10	3.23468e-11			0.341164	1228.19	1	1	0.657516
	-0.420833	-0.434548	-0.436062	-0.42666	-0.32107	-0.417419	0.00388722	-0.0468738	-0.0759457	-0.0749793	9.0725e-11	4.73574e-10	7.63227e-11	9.67175e-11	-1.77077e-10			0.100778	362.8	1	2	0.345291
	-0.503694	-0.519371	-0.521101	-0.513893	-0.3859	-0.499662	-0.990893	-0.636107	-0.432913	-0.427405	1.03708e-10	3.97251e-10	-5.33445e-10	1.14198e-10	-4.08869e-11			0.152133	547.679	1	3	2.08499
	0.0828604	0.0848231	0.0850397	0.0872328	0.0648296	0.0822433	-0.00521992	0.589233	0.356968	0.352425	-1.29835e-11	7.63227e-11	6.09768e-10	-1.74803e-11	-1.3619e-10			0.924498	3328.19	1	4	3.16757
	0.0828604	0.0848231	0.0850397	0.0872328	0.0648296	0.0822433	-0.00521992	-0.410767	0.356968	0.352425	-1.29835e-11	7.63227e-11	6.09768e-10	-1.74803e-11	-1.3619e-10			0.193164	695.391	1	5	2.64732
	0.121523	0.12445	0.124773	0.127723	0.0949726	0.120614	0.00562001	0.320589	0.500978	-0.492672	-1.93633e-11	1.00755e-10	-4.73578e-10	-2.57397e-11	-1.88458e-10			0.0140909	50.7271	1	6	0.0482789
	0.121523	0.12445	0.124773	0.127723	0.0949726	0.120614	0.00562001	0.320589	0.500978	0.507328	-1.93633e-11	1.00755e-10	-4.73578e-10	-2.57397e-11	-1.88458e-10			0.0957401	344.664	1	7	1.31212
	-0.374783	-0.356179	-0.354126	-0.358384	-0.519128	-0.379723	-0.00348713	-0.0433043	-0.0661083	-0.0652671	-1.23072e-10	-2.96497e-10	5.98678e-11	-1.39937e-10	-1.47572e-10			0.0485178	174.664	1	8	0.664939
	-0.171325	-0.231941	-0.23863	-0.253382	0.329337	-0.15419	-0.00236967	-0.0305609	-0.0467066	-0.0461122	4.00982e-10	-1.99779e-10	4.23874e-11	4.85376e-10	-1.04352e-10			0.0320228	115.282	1	9	0.109718
	-0.203458	-0.124238	-0.115496	-0.105002	0.151535	-0.225534	-0.00111746	-0.0127434	-0.0194018	-0.0191549	-5.24054e-10	-9.67175e-11	1.74803e-11	-6.25313e-10	-4.322e-11			0.109801	395.282	1	10	1.50482
	-0.203458	-0.124238	-0.115496	-0.105002	0.151535	0.774466	-0.00111746	-0.0127434	-0.0194018	-0.0191549	-5.24054e-10	-9.67175e-11	1.74803e-11	-6.25313e-10	-4.322e-11			0.173487	624.555	1	11	2.37765
	-0.204383	-0.209273	-0.209813	-0.214956	-0.159802	-0.202858	-0.000400091	0.0901781	0.142054	0.140246	3.23468e-11	-1.77077e-10	-1.3619e-10	4.322e-11	3.24649e-10			0.0723403	260.425	1	12	0.991427
																		0.156703	564.13	1	13	2.14762
																		0.851147	3064.13	1	14	1.64039
																		0.15557	560.054	1	15	2.1321

## Sheet: iteration 6
	Pipe	D (m)	L (m)	Q (m³/s)	sign (Q)	Q 1.82	Q 0.82	d 4.82	F; (eq 1)	F'; (eq 2)
Loop I	1	0.4064	100	0.341164	1	0.141252	0.414028	0.0130364	3.12704e+06	1.66817e+07		Inputs
	2	0.3048	100	0.100778	1	0.0153506	0.152321	0.00325801	1.35978e+06	2.4557e+07
	3	0.1524	100	-0.152133	-1	0.0324823	0.213512	0.000115342	-8.12747e+07	9.72307e+08		relative gas density
	4	0.3048	100	0.924498	1	0.866859	0.937654	0.00325801	7.67879e+07	1.51167e+08		0.6
								Σ	-0.00432898
Loop II	5	0.1524	100	0.193164	1	0.0501634	0.259693	0.000115342	1.25515e+08	1.18261e+09
	6	0.3048	200	0.0140909	1	0.000427628	0.0303479	0.00325801	75760	9.7853e+06
	11	0.1524	100	-0.173487	-1	0.0412542	0.237793	0.000115342	-1.03223e+08	1.08288e+09
	12	0.1524	100	-0.0723403	-1	0.008396	0.116063	0.000115342	-2.10078e+07	5.28533e+08
	2	0.3048	100	-0.100778	-1	0.0153506	0.152321	0.00325801	-1.35978e+06	2.4557e+07
								Σ	-0.000229768
Loop III	7	0.1524	100	0.0957401	1	0.0139827	0.146048	0.000115342	3.49864e+07	6.65085e+08
	8	0.1524	100	0.0485178	1	0.00405827	0.0836448	0.000115342	1.01543e+07	3.80907e+08
	9	0.3048	100	-0.0320228	-1	0.00190518	0.0594945	0.00325801	-168764	9.59162e+06
	10	0.1524	100	-0.109801	-1	0.0179432	0.163416	0.000115342	-4.48962e+07	7.44177e+08
	6	0.3048	200	-0.0140909	-1	0.000427628	0.0303479	0.00325801	-75760	9.7853e+06
								Σ	-5.19503e-08
Loop IV	3	0.1524	100	0.152133	1	0.0324823	0.213512	0.000115342	8.12747e+07	9.72307e+08
	12	0.1524	100	0.0723403	1	0.008396	0.116063	0.000115342	2.10078e+07	5.28533e+08
	13	0.1524	100	-0.156703	-1	0.0342799	0.218757	0.000115342	-8.57725e+07	9.96192e+08
	14	0.4064	100	-0.851147	-1	0.745776	0.876201	0.0130364	-1.651e+07	3.53033e+07
								Σ	0.00456286
Loop V	15	0.1524	200	0.15557	1	0.0338304	0.21746	0.000115342	1.69296e+08	1.98057e+09
	9	0.3048	100	-0.0320228	-1	0.00190518	0.0594945	0.00325801	-168764	9.59162e+06
	10	0.1524	100	-0.109801	-1	0.0179432	0.163416	0.000115342	-4.48962e+07	7.44177e+08
	11	0.1524	100	-0.173487	-1	0.0412542	0.237793	0.000115342	-1.03223e+08	1.08288e+09		changed sign (oposite than in previous iteration)
	12	0.1524	100	-0.0723403	-1	0.008396	0.116063	0.000115342	-2.10078e+07	5.28533e+08		stoping criterion (stop when result is 0.00)
								Σ	-0.000105422
[NL]	Pipe 1	Pipe 2	Pipe 3	Pipe 4	Pipe 5	Pipe 6	Pipe 7	Pipe 8	Pipe 9	Pipe 10	Pipe 11	Pipe 12	Pipe 13	Pipe 14	Pipe 15
Node 1	0	0	-1	-1	0	0	0	0	0	0	0	0	0	-1	0	Node equations			Node 1 - input-consumption	-1.92778	[V]
Node 2	-1	0	0	1	0	0	0	0	0	0	0	0	0	0	0				Node 2 - consumption	0.583333
Node 3	1	-1	0	0	-1	0	0	0	0	0	0	0	0	0	0				Node 3 - consumption	0.0472222
Node 4	0	1	1	0	0	0	0	0	0	0	0	-1	0	0	-1				Node 4 - consumption	0.025
Node 5	0	0	0	0	0	0	0	0	0	0	-1	1	1	0	0				Node 5 - consumption	0.0555556
Node 6	0	0	0	0	0	0	0	0	0	0	0	0	-1	1	0				Node 6 - consumption	0.694444
Node 7	0	0	0	0	1	-1	-1	0	0	0	0	0	0	0	0				Node 7 - consumption	0.0833333
Node 8	0	0	0	0	0	0	1	-1	0	0	0	0	0	0	0				Node 8 - consumption	0.0472222
Node 9	0	0	0	0	0	0	0	1	1	0	0	0	0	0	1				Node 9 - consumption	0.236111
Node 10	0	0	0	0	0	0	0	0	-1	1	0	0	0	0	0				Node 10 - consumption	0.0777778
Loop 1	1.66817e+07	2.4557e+07	-9.72307e+08	1.51167e+08	0	0	0	0	0	0	0	0	0	0	0	Loop equations			-A₁+(A₂·A₃+A₄·A₅+A₆·A₇+A₈·A₉)	-0.0035498
Loop 2	0	-2.4557e+07	0	0	1.18261e+09	9.7853e+06	0	0	0	0	-1.08288e+09	-5.28533e+08	0	0	0				-B₁+(B₂·B₃+B₄·B₅+B₆·B₇+B₈·B₉+B10·B11)	-0.000188353
Loop 3	0	0	0	0	0	-9.7853e+06	6.65085e+08	3.80907e+08	-9.59162e+06	-7.44177e+08	0	0	0	0	0				-C₁+(C₂·C₃+C₄·C₅+C₆·C₇+C₈·C₉+C10·C11)	-1.28348e-08
Loop 4	0	0	9.72307e+08	0	0	0	0	0	0	0	0	5.28533e+08	-9.96192e+08	-3.53033e+07	0				-D₁+(D₂·D₃+D₄·D₅+D₆·D₇+D₈·D₉)	0.00374154
Loop 5	0	0	0	0	0	0	0	0	-9.59162e+06	-7.44177e+08	-1.08288e+09	-5.28533e+08	0	0	1.98057e+09				-E₁+(E₂·E₃+E₄·E₅+E₆·E₇+E₈·E₉+E10·E11)	-8.64901e-05
inv [NL]	-0.673829	-0.870041	0.108307	0.0786602	-0.133272	-0.655329	0.00101482	0.0096499	0.0145954	0.0144097	1.29797e-09	9.07249e-11	-1.29834e-11	5.24053e-10	3.23466e-11
	-0.252996	-0.435493	-0.455632	0.50532	0.187798	-0.23791	-0.00287241	0.0565237	0.090541	0.0893889	1.20725e-09	-3.82849e-10	-8.93061e-11	4.27335e-10	2.09424e-10		final results	[Q]=inv[NL]x[V]
	-0.122713	-0.00572102	0.00718933	0.0263417	-0.0182635	-0.119138	0.000102641	0.00309344	0.00480634	0.00474518	-7.73922e-10	5.99244e-12	-4.49688e-12	1.0126e-10	1.08733e-11		result [Q]	Q (m3/s)	Q (m3/h)	sign	Pipe	velocity (m/s)
	-0.673829	0.129959	0.108307	0.0786602	-0.133272	-0.655329	0.00101482	0.0096499	0.0145954	0.0144097	1.29797e-09	9.07249e-11	-1.29834e-11	5.24053e-10	3.23466e-11			0.341164	1228.19	1	1	0.657516
	-0.420833	-0.434548	-0.436061	-0.42666	-0.32107	-0.417419	0.00388722	-0.0468738	-0.0759457	-0.0749793	9.07249e-11	4.73574e-10	7.63226e-11	9.67173e-11	-1.77077e-10			0.100778	362.8	1	2	0.345291
	-0.503694	-0.519371	-0.521101	-0.513893	-0.3859	-0.499662	-0.990893	-0.636107	-0.432913	-0.427405	1.03708e-10	3.97251e-10	-5.33445e-10	1.14198e-10	-4.08869e-11			0.152133	547.679	1	3	2.08499
	0.0828604	0.0848231	0.0850397	0.0872328	0.0648296	0.0822433	-0.00521992	0.589233	0.356968	0.352425	-1.29834e-11	7.63226e-11	6.09768e-10	-1.74803e-11	-1.3619e-10			0.924498	3328.19	1	4	3.16757
	0.0828604	0.0848231	0.0850397	0.0872328	0.0648296	0.0822433	-0.00521992	-0.410767	0.356968	0.352425	-1.29834e-11	7.63226e-11	6.09768e-10	-1.74803e-11	-1.3619e-10			0.193164	695.391	1	5	2.64732
	0.121523	0.12445	0.124773	0.127723	0.0949727	0.120614	0.00562001	0.320589	0.500978	-0.492672	-1.93632e-11	1.00755e-10	-4.73578e-10	-2.57396e-11	-1.88459e-10			0.0140909	50.7271	1	6	0.0482789
	0.121523	0.12445	0.124773	0.127723	0.0949727	0.120614	0.00562001	0.320589	0.500978	0.507328	-1.93632e-11	1.00755e-10	-4.73578e-10	-2.57396e-11	-1.88459e-10			0.0957401	344.664	1	7	1.31212
	-0.374783	-0.356179	-0.354126	-0.358385	-0.519128	-0.379723	-0.00348713	-0.0433043	-0.0661084	-0.0652671	-1.23072e-10	-2.96497e-10	5.98678e-11	-1.39937e-10	-1.47572e-10			0.0485178	174.664	1	8	0.664939
	-0.171325	-0.231941	-0.23863	-0.253383	0.329337	-0.15419	-0.00236967	-0.0305609	-0.0467066	-0.0461123	4.00981e-10	-1.99779e-10	4.23875e-11	4.85376e-10	-1.04352e-10			0.0320228	115.282	1	9	0.109718
	-0.203458	-0.124238	-0.115496	-0.105002	0.151535	-0.225533	-0.00111746	-0.0127433	-0.0194017	-0.0191548	-5.24053e-10	-9.67173e-11	1.74803e-11	-6.25313e-10	-4.32199e-11			0.109801	395.282	1	10	1.50482
	-0.203458	-0.124238	-0.115496	-0.105002	0.151535	0.774467	-0.00111746	-0.0127433	-0.0194017	-0.0191548	-5.24053e-10	-9.67173e-11	1.74803e-11	-6.25313e-10	-4.32199e-11			0.173487	624.555	1	11	2.37765
	-0.204383	-0.209273	-0.209813	-0.214956	-0.159802	-0.202858	-0.00040009	0.0901781	0.142054	0.140246	3.23466e-11	-1.77077e-10	-1.3619e-10	4.32199e-11	3.24649e-10			0.0723403	260.425	1	12	0.991427
																		0.156703	564.13	1	13	2.14762
																		0.851147	3064.13	1	14	1.64039
																		0.15557	560.054	1	15	2.1321

## Sheet: iteration 7
	Pipe	D (m)	L (m)	Q (m³/s)	sign (Q)	Q 1.82	Q 0.82	d 4.82	F; (eq 1)	F'; (eq 2)
Loop I	1	0.4064	100	0.341164	1	0.141252	0.414028	0.0130364	3.12704e+06	1.66817e+07		Inputs
	2	0.3048	100	0.100778	1	0.0153506	0.152321	0.00325801	1.35978e+06	2.4557e+07
	3	0.1524	100	-0.152133	-1	0.0324823	0.213512	0.000115342	-8.12747e+07	9.72307e+08		relative gas density
	4	0.3048	100	0.924498	1	0.866859	0.937654	0.00325801	7.67879e+07	1.51167e+08		0.6
								Σ	0
Loop II	5	0.1524	100	0.193164	1	0.0501634	0.259693	0.000115342	1.25515e+08	1.18261e+09
	6	0.3048	200	0.0140909	1	0.000427628	0.0303479	0.00325801	75760	9.7853e+06
	11	0.1524	100	-0.173487	-1	0.0412542	0.237793	0.000115342	-1.03223e+08	1.08288e+09
	12	0.1524	100	-0.0723403	-1	0.008396	0.116063	0.000115342	-2.10078e+07	5.28533e+08
	2	0.3048	100	-0.100778	-1	0.0153506	0.152321	0.00325801	-1.35978e+06	2.4557e+07
								Σ	-1.14087e-07
Loop III	7	0.1524	100	0.0957401	1	0.0139827	0.146048	0.000115342	3.49864e+07	6.65085e+08
	8	0.1524	100	0.0485178	1	0.00405827	0.0836448	0.000115342	1.01543e+07	3.80907e+08
	9	0.3048	100	-0.0320228	-1	0.00190518	0.0594945	0.00325801	-168764	9.59162e+06
	10	0.1524	100	-0.109801	-1	0.0179432	0.163416	0.000115342	-4.48962e+07	7.44177e+08
	6	0.3048	200	-0.0140909	-1	0.000427628	0.0303479	0.00325801	-75760	9.7853e+06
								Σ	1.42027e-08
Loop IV	3	0.1524	100	0.152133	1	0.0324823	0.213512	0.000115342	8.12747e+07	9.72307e+08
	12	0.1524	100	0.0723403	1	0.008396	0.116063	0.000115342	2.10078e+07	5.28533e+08
	13	0.1524	100	-0.156703	-1	0.0342799	0.218757	0.000115342	-8.57725e+07	9.96192e+08
	14	0.4064	100	-0.851147	-1	0.745776	0.876201	0.0130364	-1.651e+07	3.53033e+07
								Σ	-1.17347e-07
Loop V	15	0.1524	200	0.15557	1	0.0338304	0.21746	0.000115342	1.69296e+08	1.98057e+09
	9	0.3048	100	-0.0320228	-1	0.00190518	0.0594945	0.00325801	-168764	9.59162e+06
	10	0.1524	100	-0.109801	-1	0.0179432	0.163416	0.000115342	-4.48962e+07	7.44177e+08
	11	0.1524	100	-0.173487	-1	0.0412542	0.237793	0.000115342	-1.03223e+08	1.08288e+09		changed sign (oposite than in previous iteration)
	12	0.1524	100	-0.0723403	-1	0.008396	0.116063	0.000115342	-2.10078e+07	5.28533e+08		stoping criterion (stop when result is 0.00)
								Σ	1.82539e-07
[NL]	Pipe 1	Pipe 2	Pipe 3	Pipe 4	Pipe 5	Pipe 6	Pipe 7	Pipe 8	Pipe 9	Pipe 10	Pipe 11	Pipe 12	Pipe 13	Pipe 14	Pipe 15
Node 1	0	0	-1	-1	0	0	0	0	0	0	0	0	0	-1	0	Node equations			Node 1 - input-consumption	-1.92778	[V]
Node 2	-1	0	0	1	0	0	0	0	0	0	0	0	0	0	0				Node 2 - consumption	0.583333
Node 3	1	-1	0	0	-1	0	0	0	0	0	0	0	0	0	0				Node 3 - consumption	0.0472222
Node 4	0	1	1	0	0	0	0	0	0	0	0	-1	0	0	-1				Node 4 - consumption	0.025
Node 5	0	0	0	0	0	0	0	0	0	0	-1	1	1	0	0				Node 5 - consumption	0.0555556
Node 6	0	0	0	0	0	0	0	0	0	0	0	0	-1	1	0				Node 6 - consumption	0.694444
Node 7	0	0	0	0	1	-1	-1	0	0	0	0	0	0	0	0				Node 7 - consumption	0.0833333
Node 8	0	0	0	0	0	0	1	-1	0	0	0	0	0	0	0				Node 8 - consumption	0.0472222
Node 9	0	0	0	0	0	0	0	1	1	0	0	0	0	0	1				Node 9 - consumption	0.236111
Node 10	0	0	0	0	0	0	0	0	-1	1	0	0	0	0	0				Node 10 - consumption	0.0777778
Loop 1	1.66817e+07	2.4557e+07	-9.72307e+08	1.51167e+08	0	0	0	0	0	0	0	0	0	0	0	Loop equations			-A₁+(A₂·A₃+A₄·A₅+A₆·A₇+A₈·A₉)	2.98023e-08
Loop 2	0	-2.4557e+07	0	0	1.18261e+09	9.7853e+06	0	0	0	0	-1.08288e+09	-5.28533e+08	0	0	0				-B₁+(B₂·B₃+B₄·B₅+B₆·B₇+B₈·B₉+B10·B11)	-2.60305e-07
Loop 3	0	0	0	0	0	-9.7853e+06	6.65085e+08	3.80907e+08	-9.59162e+06	-7.44177e+08	0	0	0	0	0				-C₁+(C₂·C₃+C₄·C₅+C₆·C₇+C₈·C₉+C10·C11)	5.82077e-09
Loop 4	0	0	9.72307e+08	0	0	0	0	0	0	0	0	5.28533e+08	-9.96192e+08	-3.53033e+07	0				-D₁+(D₂·D₃+D₄·D₅+D₆·D₇+D₈·D₉)	-5.7742e-08
Loop 5	0	0	0	0	0	0	0	0	-9.59162e+06	-7.44177e+08	-1.08288e+09	-5.28533e+08	0	0	1.98057e+09				-E₁+(E₂·E₃+E₄·E₅+E₆·E₇+E₈·E₉+E10·E11)	-2.6077e-08
inv [NL]	-0.673829	-0.870041	0.108307	0.0786602	-0.133272	-0.655329	0.00101482	0.0096499	0.0145954	0.0144097	1.29797e-09	9.07249e-11	-1.29834e-11	5.24053e-10	3.23466e-11
	-0.252996	-0.435493	-0.455632	0.50532	0.187798	-0.23791	-0.00287241	0.0565237	0.090541	0.0893889	1.20725e-09	-3.82849e-10	-8.93061e-11	4.27335e-10	2.09424e-10		final results	[Q]=inv[NL]x[V]
	-0.122713	-0.00572102	0.00718933	0.0263417	-0.0182635	-0.119138	0.000102641	0.00309344	0.00480634	0.00474518	-7.73922e-10	5.99244e-12	-4.49688e-12	1.0126e-10	1.08733e-11		result [Q]	Q (m3/s)	Q (m3/h)	sign	Pipe	velocity (m/s)
	-0.673829	0.129959	0.108307	0.0786602	-0.133272	-0.655329	0.00101482	0.0096499	0.0145954	0.0144097	1.29797e-09	9.07249e-11	-1.29834e-11	5.24053e-10	3.23466e-11			0.341164	1228.19	1	1	0.657516
	-0.420833	-0.434548	-0.436061	-0.42666	-0.32107	-0.417419	0.00388722	-0.0468738	-0.0759457	-0.0749793	9.07249e-11	4.73574e-10	7.63226e-11	9.67173e-11	-1.77077e-10			0.100778	362.8	1	2	0.345291
	-0.503694	-0.519371	-0.521101	-0.513893	-0.3859	-0.499662	-0.990893	-0.636107	-0.432913	-0.427405	1.03708e-10	3.97251e-10	-5.33445e-10	1.14198e-10	-4.08869e-11			0.152133	547.679	1	3	2.08499
	0.0828604	0.0848231	0.0850397	0.0872328	0.0648296	0.0822433	-0.00521992	0.589233	0.356968	0.352425	-1.29834e-11	7.63226e-11	6.09768e-10	-1.74803e-11	-1.3619e-10			0.924498	3328.19	1	4	3.16757
	0.0828604	0.0848231	0.0850397	0.0872328	0.0648296	0.0822433	-0.00521992	-0.410767	0.356968	0.352425	-1.29834e-11	7.63226e-11	6.09768e-10	-1.74803e-11	-1.3619e-10			0.193164	695.391	1	5	2.64732
	0.121523	0.12445	0.124773	0.127723	0.0949727	0.120614	0.00562001	0.320589	0.500978	-0.492672	-1.93632e-11	1.00755e-10	-4.73578e-10	-2.57396e-11	-1.88459e-10			0.0140909	50.7271	1	6	0.0482789
	0.121523	0.12445	0.124773	0.127723	0.0949727	0.120614	0.00562001	0.320589	0.500978	0.507328	-1.93632e-11	1.00755e-10	-4.73578e-10	-2.57396e-11	-1.88459e-10			0.0957401	344.664	1	7	1.31212
	-0.374783	-0.356179	-0.354126	-0.358385	-0.519128	-0.379723	-0.00348713	-0.0433043	-0.0661084	-0.0652671	-1.23072e-10	-2.96497e-10	5.98678e-11	-1.39937e-10	-1.47572e-10			0.0485178	174.664	1	8	0.664939
	-0.171325	-0.231941	-0.23863	-0.253383	0.329337	-0.15419	-0.00236967	-0.0305609	-0.0467066	-0.0461123	4.00981e-10	-1.99779e-10	4.23875e-11	4.85376e-10	-1.04352e-10			0.0320228	115.282	1	9	0.109718
	-0.203458	-0.124238	-0.115496	-0.105002	0.151535	-0.225533	-0.00111746	-0.0127433	-0.0194017	-0.0191548	-5.24053e-10	-9.67173e-11	1.74803e-11	-6.25313e-10	-4.32199e-11			0.109801	395.282	1	10	1.50482
	-0.203458	-0.124238	-0.115496	-0.105002	0.151535	0.774467	-0.00111746	-0.0127433	-0.0194017	-0.0191548	-5.24053e-10	-9.67173e-11	1.74803e-11	-6.25313e-10	-4.32199e-11			0.173487	624.555	1	11	2.37765
	-0.204383	-0.209273	-0.209813	-0.214956	-0.159802	-0.202858	-0.00040009	0.0901781	0.142054	0.140246	3.23466e-11	-1.77077e-10	-1.3619e-10	4.32199e-11	3.24649e-10			0.0723403	260.425	1	12	0.991427
																		0.156703	564.13	1	13	2.14762
																		0.851147	3064.13	1	14	1.64039
																		0.15557	560.054	1	15	2.1321

## Sheet: iteration 8
	Pipe	D (m)	L (m)	Q (m³/s)	sign (Q)	Q 1.82	Q 0.82	d 4.82	F; (eq 1)	F'; (eq 2)
Loop I	1	0.4064	100	0.341164	1	0.141252	0.414028	0.0130364	3.12704e+06	1.66817e+07		Inputs
	2	0.3048	100	0.100778	1	0.0153506	0.152321	0.00325801	1.35978e+06	2.4557e+07
	3	0.1524	100	-0.152133	-1	0.0324823	0.213512	0.000115342	-8.12747e+07	9.72307e+08		relative gas density
	4	0.3048	100	0.924498	1	0.866859	0.937654	0.00325801	7.67879e+07	1.51167e+08		0.6
								Σ	0
Loop II	5	0.1524	100	0.193164	1	0.0501634	0.259693	0.000115342	1.25515e+08	1.18261e+09
	6	0.3048	200	0.0140909	1	0.000427628	0.0303479	0.00325801	75760	9.7853e+06
	11	0.1524	100	-0.173487	-1	0.0412542	0.237793	0.000115342	-1.03223e+08	1.08288e+09
	12	0.1524	100	-0.0723403	-1	0.008396	0.116063	0.000115342	-2.10078e+07	5.28533e+08
	2	0.3048	100	-0.100778	-1	0.0153506	0.152321	0.00325801	-1.35978e+06	2.4557e+07
								Σ	-1.66241e-07
Loop III	7	0.1524	100	0.0957401	1	0.0139827	0.146048	0.000115342	3.49864e+07	6.65085e+08
	8	0.1524	100	0.0485178	1	0.00405827	0.0836448	0.000115342	1.01543e+07	3.80907e+08
	9	0.3048	100	-0.0320228	-1	0.00190518	0.0594945	0.00325801	-168764	9.59162e+06
	10	0.1524	100	-0.109801	-1	0.0179432	0.163416	0.000115342	-4.48962e+07	7.44177e+08
	6	0.3048	200	-0.0140909	-1	0.000427628	0.0303479	0.00325801	-75760	9.7853e+06
								Σ	-2.83035e-08
Loop IV	3	0.1524	100	0.152133	1	0.0324823	0.213512	0.000115342	8.12747e+07	9.72307e+08
	12	0.1524	100	0.0723403	1	0.008396	0.116063	0.000115342	2.10078e+07	5.28533e+08
	13	0.1524	100	-0.156703	-1	0.0342799	0.218757	0.000115342	-8.57725e+07	9.96192e+08
	14	0.4064	100	-0.851147	-1	0.745776	0.876201	0.0130364	-1.651e+07	3.53033e+07
								Σ	0
Loop V	15	0.1524	200	0.15557	1	0.0338304	0.21746	0.000115342	1.69296e+08	1.98057e+09
	9	0.3048	100	-0.0320228	-1	0.00190518	0.0594945	0.00325801	-168764	9.59162e+06
	10	0.1524	100	-0.109801	-1	0.0179432	0.163416	0.000115342	-4.48962e+07	7.44177e+08
	11	0.1524	100	-0.173487	-1	0.0412542	0.237793	0.000115342	-1.03223e+08	1.08288e+09		changed sign (oposite than in previous iteration)
	12	0.1524	100	-0.0723403	-1	0.008396	0.116063	0.000115342	-2.10078e+07	5.28533e+08		stoping criterion (stop when result is 0.00)
								Σ	0
[NL]	Pipe 1	Pipe 2	Pipe 3	Pipe 4	Pipe 5	Pipe 6	Pipe 7	Pipe 8	Pipe 9	Pipe 10	Pipe 11	Pipe 12	Pipe 13	Pipe 14	Pipe 15
Node 1	0	0	-1	-1	0	0	0	0	0	0	0	0	0	-1	0	Node equations			Node 1 - input-consumption	-1.92778	[V]
Node 2	-1	0	0	1	0	0	0	0	0	0	0	0	0	0	0				Node 2 - consumption	0.583333
Node 3	1	-1	0	0	-1	0	0	0	0	0	0	0	0	0	0				Node 3 - consumption	0.0472222
Node 4	0	1	1	0	0	0	0	0	0	0	0	-1	0	0	-1				Node 4 - consumption	0.025
Node 5	0	0	0	0	0	0	0	0	0	0	-1	1	1	0	0				Node 5 - consumption	0.0555556
Node 6	0	0	0	0	0	0	0	0	0	0	0	0	-1	1	0				Node 6 - consumption	0.694444
Node 7	0	0	0	0	1	-1	-1	0	0	0	0	0	0	0	0				Node 7 - consumption	0.0833333
Node 8	0	0	0	0	0	0	1	-1	0	0	0	0	0	0	0				Node 8 - consumption	0.0472222
Node 9	0	0	0	0	0	0	0	1	1	0	0	0	0	0	1				Node 9 - consumption	0.236111
Node 10	0	0	0	0	0	0	0	0	-1	1	0	0	0	0	0				Node 10 - consumption	0.0777778
Loop 1	1.66817e+07	2.4557e+07	-9.72307e+08	1.51167e+08	0	0	0	0	0	0	0	0	0	0	0	Loop equations			-A₁+(A₂·A₃+A₄·A₅+A₆·A₇+A₈·A₉)	8.9407e-08
Loop 2	0	-2.4557e+07	0	0	1.18261e+09	9.7853e+06	0	0	0	0	-1.08288e+09	-5.28533e+08	0	0	0				-B₁+(B₂·B₃+B₄·B₅+B₆·B₇+B₈·B₉+B10·B11)	-1.56928e-07
Loop 3	0	0	0	0	0	-9.7853e+06	6.65085e+08	3.80907e+08	-9.59162e+06	-7.44177e+08	0	0	0	0	0				-C₁+(C₂·C₃+C₄·C₅+C₆·C₇+C₈·C₉+C10·C11)	-1.95432e-08
Loop 4	0	0	9.72307e+08	0	0	0	0	0	0	0	0	5.28533e+08	-9.96192e+08	-3.53033e+07	0				-D₁+(D₂·D₃+D₄·D₅+D₆·D₇+D₈·D₉)	-3.72529e-08
Loop 5	0	0	0	0	0	0	0	0	-9.59162e+06	-7.44177e+08	-1.08288e+09	-5.28533e+08	0	0	1.98057e+09				-E₁+(E₂·E₃+E₄·E₅+E₆·E₇+E₈·E₉+E10·E11)	1.3411e-07
inv [NL]	-0.673829	-0.870041	0.108307	0.0786602	-0.133272	-0.655329	0.00101482	0.0096499	0.0145954	0.0144097	1.29797e-09	9.07249e-11	-1.29834e-11	5.24053e-10	3.23466e-11
	-0.252996	-0.435493	-0.455632	0.50532	0.187798	-0.23791	-0.00287241	0.0565237	0.090541	0.0893889	1.20725e-09	-3.82849e-10	-8.93061e-11	4.27335e-10	2.09424e-10		final results	[Q]=inv[NL]x[V]
	-0.122713	-0.00572102	0.00718933	0.0263417	-0.0182635	-0.119138	0.000102641	0.00309344	0.00480634	0.00474518	-7.73922e-10	5.99244e-12	-4.49688e-12	1.0126e-10	1.08733e-11		result [Q]	Q (m3/s)	Q (m3/h)	sign	Pipe	velocity (m/s)
	-0.673829	0.129959	0.108307	0.0786602	-0.133272	-0.655329	0.00101482	0.0096499	0.0145954	0.0144097	1.29797e-09	9.07249e-11	-1.29834e-11	5.24053e-10	3.23466e-11			0.341164	1228.19	1	1	0.657516
	-0.420833	-0.434548	-0.436061	-0.42666	-0.32107	-0.417419	0.00388722	-0.0468738	-0.0759457	-0.0749793	9.07249e-11	4.73574e-10	7.63226e-11	9.67173e-11	-1.77077e-10			0.100778	362.8	1	2	0.345291
	-0.503694	-0.519371	-0.521101	-0.513893	-0.3859	-0.499662	-0.990893	-0.636107	-0.432913	-0.427405	1.03708e-10	3.97251e-10	-5.33445e-10	1.14198e-10	-4.08869e-11			0.152133	547.679	1	3	2.08499
	0.0828604	0.0848231	0.0850397	0.0872328	0.0648296	0.0822433	-0.00521992	0.589233	0.356968	0.352425	-1.29834e-11	7.63226e-11	6.09768e-10	-1.74803e-11	-1.3619e-10			0.924498	3328.19	1	4	3.16757
	0.0828604	0.0848231	0.0850397	0.0872328	0.0648296	0.0822433	-0.00521992	-0.410767	0.356968	0.352425	-1.29834e-11	7.63226e-11	6.09768e-10	-1.74803e-11	-1.3619e-10			0.193164	695.391	1	5	2.64732
	0.121523	0.12445	0.124773	0.127723	0.0949727	0.120614	0.00562001	0.320589	0.500978	-0.492672	-1.93632e-11	1.00755e-10	-4.73578e-10	-2.57396e-11	-1.88459e-10			0.0140909	50.7271	1	6	0.0482789
	0.121523	0.12445	0.124773	0.127723	0.0949727	0.120614	0.00562001	0.320589	0.500978	0.507328	-1.93632e-11	1.00755e-10	-4.73578e-10	-2.57396e-11	-1.88459e-10			0.0957401	344.664	1	7	1.31212
	-0.374783	-0.356179	-0.354126	-0.358385	-0.519128	-0.379723	-0.00348713	-0.0433043	-0.0661084	-0.0652671	-1.23072e-10	-2.96497e-10	5.98678e-11	-1.39937e-10	-1.47572e-10			0.0485178	174.664	1	8	0.664939
	-0.171325	-0.231941	-0.23863	-0.253383	0.329337	-0.15419	-0.00236967	-0.0305609	-0.0467066	-0.0461123	4.00981e-10	-1.99779e-10	4.23875e-11	4.85376e-10	-1.04352e-10			0.0320228	115.282	1	9	0.109718
	-0.203458	-0.124238	-0.115496	-0.105002	0.151535	-0.225533	-0.00111746	-0.0127433	-0.0194017	-0.0191548	-5.24053e-10	-9.67173e-11	1.74803e-11	-6.25313e-10	-4.32199e-11			0.109801	395.282	1	10	1.50482
	-0.203458	-0.124238	-0.115496	-0.105002	0.151535	0.774467	-0.00111746	-0.0127433	-0.0194017	-0.0191548	-5.24053e-10	-9.67173e-11	1.74803e-11	-6.25313e-10	-4.32199e-11			0.173487	624.555	1	11	2.37765
	-0.204383	-0.209273	-0.209813	-0.214956	-0.159802	-0.202858	-0.00040009	0.0901781	0.142054	0.140246	3.23466e-11	-1.77077e-10	-1.3619e-10	4.32199e-11	3.24649e-10			0.0723403	260.425	1	12	0.991427
																		0.156703	564.13	1	13	2.14762
																		0.851147	3064.13	1	14	1.64039
																		0.15557	560.054	1	15	2.1321

## Sheet: iteration 9
	Pipe	D (m)	L (m)	Q (m³/s)	sign (Q)	Q 1.82	Q 0.82	d 4.82	F; (eq 1)	F'; (eq 2)
Loop I	1	0.4064	100	0.341164	1	0.141252	0.414028	0.0130364	3.12704e+06	1.66817e+07		Inputs
	2	0.3048	100	0.100778	1	0.0153506	0.152321	0.00325801	1.35978e+06	2.4557e+07
	3	0.1524	100	-0.152133	-1	0.0324823	0.213512	0.000115342	-8.12747e+07	9.72307e+08		relative gas density
	4	0.3048	100	0.924498	1	0.866859	0.937654	0.00325801	7.67879e+07	1.51167e+08		0.6
								Σ	0
Loop II	5	0.1524	100	0.193164	1	0.0501634	0.259693	0.000115342	1.25515e+08	1.18261e+09
	6	0.3048	200	0.0140909	1	0.000427628	0.0303479	0.00325801	75760	9.7853e+06
	11	0.1524	100	-0.173487	-1	0.0412542	0.237793	0.000115342	-1.03223e+08	1.08288e+09
	12	0.1524	100	-0.0723403	-1	0.008396	0.116063	0.000115342	-2.10078e+07	5.28533e+08
	2	0.3048	100	-0.100778	-1	0.0153506	0.152321	0.00325801	-1.35978e+06	2.4557e+07
								Σ	2.40747e-07
Loop III	7	0.1524	100	0.0957401	1	0.0139827	0.146048	0.000115342	3.49864e+07	6.65085e+08
	8	0.1524	100	0.0485178	1	0.00405827	0.0836448	0.000115342	1.01543e+07	3.80907e+08
	9	0.3048	100	-0.0320228	-1	0.00190518	0.0594945	0.00325801	-168764	9.59162e+06
	10	0.1524	100	-0.109801	-1	0.0179432	0.163416	0.000115342	-4.48962e+07	7.44177e+08
	6	0.3048	200	-0.0140909	-1	0.000427628	0.0303479	0.00325801	-75760	9.7853e+06
								Σ	-1.63855e-08
Loop IV	3	0.1524	100	0.152133	1	0.0324823	0.213512	0.000115342	8.12747e+07	9.72307e+08
	12	0.1524	100	0.0723403	1	0.008396	0.116063	0.000115342	2.10078e+07	5.28533e+08
	13	0.1524	100	-0.156703	-1	0.0342799	0.218757	0.000115342	-8.57725e+07	9.96192e+08
	14	0.4064	100	-0.851147	-1	0.745776	0.876201	0.0130364	-1.651e+07	3.53033e+07
								Σ	4.84288e-08
Loop V	15	0.1524	200	0.15557	1	0.0338304	0.21746	0.000115342	1.69296e+08	1.98057e+09
	9	0.3048	100	-0.0320228	-1	0.00190518	0.0594945	0.00325801	-168764	9.59162e+06
	10	0.1524	100	-0.109801	-1	0.0179432	0.163416	0.000115342	-4.48962e+07	7.44177e+08
	11	0.1524	100	-0.173487	-1	0.0412542	0.237793	0.000115342	-1.03223e+08	1.08288e+09		changed sign (oposite than in previous iteration)
	12	0.1524	100	-0.0723403	-1	0.008396	0.116063	0.000115342	-2.10078e+07	5.28533e+08		stoping criterion (stop when result is 0.00)
								Σ	2.86847e-07
[NL]	Pipe 1	Pipe 2	Pipe 3	Pipe 4	Pipe 5	Pipe 6	Pipe 7	Pipe 8	Pipe 9	Pipe 10	Pipe 11	Pipe 12	Pipe 13	Pipe 14	Pipe 15
Node 1	0	0	-1	-1	0	0	0	0	0	0	0	0	0	-1	0	Node equations			Node 1 - input-consumption	-1.92778	[V]
Node 2	-1	0	0	1	0	0	0	0	0	0	0	0	0	0	0				Node 2 - consumption	0.583333
Node 3	1	-1	0	0	-1	0	0	0	0	0	0	0	0	0	0				Node 3 - consumption	0.0472222
Node 4	0	1	1	0	0	0	0	0	0	0	0	-1	0	0	-1				Node 4 - consumption	0.025
Node 5	0	0	0	0	0	0	0	0	0	0	-1	1	1	0	0				Node 5 - consumption	0.0555556
Node 6	0	0	0	0	0	0	0	0	0	0	0	0	-1	1	0				Node 6 - consumption	0.694444
Node 7	0	0	0	0	1	-1	-1	0	0	0	0	0	0	0	0				Node 7 - consumption	0.0833333
Node 8	0	0	0	0	0	0	1	-1	0	0	0	0	0	0	0				Node 8 - consumption	0.0472222
Node 9	0	0	0	0	0	0	0	1	1	0	0	0	0	0	1				Node 9 - consumption	0.236111
Node 10	0	0	0	0	0	0	0	0	-1	1	0	0	0	0	0				Node 10 - consumption	0.0777778
Loop 1	1.66817e+07	2.4557e+07	-9.72307e+08	1.51167e+08	0	0	0	0	0	0	0	0	0	0	0	Loop equations			-A₁+(A₂·A₃+A₄·A₅+A₆·A₇+A₈·A₉)	5.96046e-08
Loop 2	0	-2.4557e+07	0	0	1.18261e+09	9.7853e+06	0	0	0	0	-1.08288e+09	-5.28533e+08	0	0	0				-B₁+(B₂·B₃+B₄·B₅+B₆·B₇+B₈·B₉+B10·B11)	1.98372e-07
Loop 3	0	0	0	0	0	-9.7853e+06	6.65085e+08	3.80907e+08	-9.59162e+06	-7.44177e+08	0	0	0	0	0				-C₁+(C₂·C₃+C₄·C₅+C₆·C₇+C₈·C₉+C10·C11)	3.35276e-08
Loop 4	0	0	9.72307e+08	0	0	0	0	0	0	0	0	5.28533e+08	-9.96192e+08	-3.53033e+07	0				-D₁+(D₂·D₃+D₄·D₅+D₆·D₇+D₈·D₉)	1.15484e-07
Loop 5	0	0	0	0	0	0	0	0	-9.59162e+06	-7.44177e+08	-1.08288e+09	-5.28533e+08	0	0	1.98057e+09				-E₁+(E₂·E₃+E₄·E₅+E₆·E₇+E₈·E₉+E10·E11)	4.06057e-07
inv [NL]	-0.673829	-0.870041	0.108307	0.0786602	-0.133272	-0.655329	0.00101482	0.0096499	0.0145954	0.0144097	1.29797e-09	9.07249e-11	-1.29834e-11	5.24053e-10	3.23466e-11
	-0.252996	-0.435493	-0.455632	0.50532	0.187798	-0.23791	-0.00287241	0.0565237	0.090541	0.0893889	1.20725e-09	-3.82849e-10	-8.93061e-11	4.27335e-10	2.09424e-10		final results	[Q]=inv[NL]x[V]
	-0.122713	-0.00572102	0.00718933	0.0263417	-0.0182635	-0.119138	0.000102641	0.00309344	0.00480634	0.00474518	-7.73922e-10	5.99244e-12	-4.49688e-12	1.0126e-10	1.08733e-11		result [Q]	Q (m3/s)	Q (m3/h)	sign	Pipe	velocity (m/s)
	-0.673829	0.129959	0.108307	0.0786602	-0.133272	-0.655329	0.00101482	0.0096499	0.0145954	0.0144097	1.29797e-09	9.07249e-11	-1.29834e-11	5.24053e-10	3.23466e-11			0.341164	1228.19	1	1	0.657516
	-0.420833	-0.434548	-0.436061	-0.42666	-0.32107	-0.417419	0.00388722	-0.0468738	-0.0759457	-0.0749793	9.07249e-11	4.73574e-10	7.63226e-11	9.67173e-11	-1.77077e-10			0.100778	362.8	1	2	0.345291
	-0.503694	-0.519371	-0.521101	-0.513893	-0.3859	-0.499662	-0.990893	-0.636107	-0.432913	-0.427405	1.03708e-10	3.97251e-10	-5.33445e-10	1.14198e-10	-4.08869e-11			0.152133	547.679	1	3	2.08499
	0.0828604	0.0848231	0.0850397	0.0872328	0.0648296	0.0822433	-0.00521992	0.589233	0.356968	0.352425	-1.29834e-11	7.63226e-11	6.09768e-10	-1.74803e-11	-1.3619e-10			0.924498	3328.19	1	4	3.16757
	0.0828604	0.0848231	0.0850397	0.0872328	0.0648296	0.0822433	-0.00521992	-0.410767	0.356968	0.352425	-1.29834e-11	7.63226e-11	6.09768e-10	-1.74803e-11	-1.3619e-10			0.193164	695.391	1	5	2.64732
	0.121523	0.12445	0.124773	0.127723	0.0949727	0.120614	0.00562001	0.320589	0.500978	-0.492672	-1.93632e-11	1.00755e-10	-4.73578e-10	-2.57396e-11	-1.88459e-10			0.0140909	50.7271	1	6	0.0482789
	0.121523	0.12445	0.124773	0.127723	0.0949727	0.120614	0.00562001	0.320589	0.500978	0.507328	-1.93632e-11	1.00755e-10	-4.73578e-10	-2.57396e-11	-1.88459e-10			0.0957401	344.664	1	7	1.31212
	-0.374783	-0.356179	-0.354126	-0.358385	-0.519128	-0.379723	-0.00348713	-0.0433043	-0.0661084	-0.0652671	-1.23072e-10	-2.96497e-10	5.98678e-11	-1.39937e-10	-1.47572e-10			0.0485178	174.664	1	8	0.664939
	-0.171325	-0.231941	-0.23863	-0.253383	0.329337	-0.15419	-0.00236967	-0.0305609	-0.0467066	-0.0461123	4.00981e-10	-1.99779e-10	4.23875e-11	4.85376e-10	-1.04352e-10			0.0320228	115.282	1	9	0.109718
	-0.203458	-0.124238	-0.115496	-0.105002	0.151535	-0.225533	-0.00111746	-0.0127433	-0.0194017	-0.0191548	-5.24053e-10	-9.67173e-11	1.74803e-11	-6.25313e-10	-4.32199e-11			0.109801	395.282	1	10	1.50482
	-0.203458	-0.124238	-0.115496	-0.105002	0.151535	0.774467	-0.00111746	-0.0127433	-0.0194017	-0.0191548	-5.24053e-10	-9.67173e-11	1.74803e-11	-6.25313e-10	-4.32199e-11			0.173487	624.555	1	11	2.37765
	-0.204383	-0.209273	-0.209813	-0.214956	-0.159802	-0.202858	-0.00040009	0.0901781	0.142054	0.140246	3.23466e-11	-1.77077e-10	-1.3619e-10	4.32199e-11	3.24649e-10			0.0723403	260.425	1	12	0.991427
																		0.156703	564.13	1	13	2.14762
																		0.851147	3064.13	1	14	1.64039
																		0.15557	560.054	1	15	2.1321

## Sheet: iteration 10
	Pipe	D (m)	L (m)	Q (m³/s)	sign (Q)	Q 1.82	Q 0.82	d 4.82	F; (eq 1)	F'; (eq 2)
Loop I	1	0.4064	100	0.341164	1	0.141252	0.414028	0.0130364	3.12704e+06	1.66817e+07		Inputs
	2	0.3048	100	0.100778	1	0.0153506	0.152321	0.00325801	1.35978e+06	2.4557e+07
	3	0.1524	100	-0.152133	-1	0.0324823	0.213512	0.000115342	-8.12747e+07	9.72307e+08		relative gas density
	4	0.3048	100	0.924498	1	0.866859	0.937654	0.00325801	7.67879e+07	1.51167e+08		0.6
								Σ	0
Loop II	5	0.1524	100	0.193164	1	0.0501634	0.259693	0.000115342	1.25515e+08	1.18261e+09
	6	0.3048	200	0.0140909	1	0.000427628	0.0303479	0.00325801	75760	9.7853e+06
	11	0.1524	100	-0.173487	-1	0.0412542	0.237793	0.000115342	-1.03223e+08	1.08288e+09
	12	0.1524	100	-0.0723403	-1	0.008396	0.116063	0.000115342	-2.10078e+07	5.28533e+08
	2	0.3048	100	-0.100778	-1	0.0153506	0.152321	0.00325801	-1.35978e+06	2.4557e+07
								Σ	-1.69966e-07
Loop III	7	0.1524	100	0.0957401	1	0.0139827	0.146048	0.000115342	3.49864e+07	6.65085e+08
	8	0.1524	100	0.0485178	1	0.00405827	0.0836448	0.000115342	1.01543e+07	3.80907e+08
	9	0.3048	100	-0.0320228	-1	0.00190518	0.0594945	0.00325801	-168764	9.59162e+06
	10	0.1524	100	-0.109801	-1	0.0179432	0.163416	0.000115342	-4.48962e+07	7.44177e+08
	6	0.3048	200	-0.0140909	-1	0.000427628	0.0303479	0.00325801	-75760	9.7853e+06
								Σ	6.1249e-08
Loop IV	3	0.1524	100	0.152133	1	0.0324823	0.213512	0.000115342	8.12747e+07	9.72307e+08
	12	0.1524	100	0.0723403	1	0.008396	0.116063	0.000115342	2.10078e+07	5.28533e+08
	13	0.1524	100	-0.156703	-1	0.0342799	0.218757	0.000115342	-8.57725e+07	9.96192e+08
	14	0.4064	100	-0.851147	-1	0.745776	0.876201	0.0130364	-1.651e+07	3.53033e+07
								Σ	-1.08033e-07
Loop V	15	0.1524	200	0.15557	1	0.0338304	0.21746	0.000115342	1.69296e+08	1.98057e+09
	9	0.3048	100	-0.0320228	-1	0.00190518	0.0594945	0.00325801	-168764	9.59162e+06
	10	0.1524	100	-0.109801	-1	0.0179432	0.163416	0.000115342	-4.48962e+07	7.44177e+08
	11	0.1524	100	-0.173487	-1	0.0412542	0.237793	0.000115342	-1.03223e+08	1.08288e+09		changed sign (oposite than in previous iteration)
	12	0.1524	100	-0.0723403	-1	0.008396	0.116063	0.000115342	-2.10078e+07	5.28533e+08		stoping criterion (stop when result is 0.00)
								Σ	-9.68575e-08
[NL]	Pipe 1	Pipe 2	Pipe 3	Pipe 4	Pipe 5	Pipe 6	Pipe 7	Pipe 8	Pipe 9	Pipe 10	Pipe 11	Pipe 12	Pipe 13	Pipe 14	Pipe 15
Node 1	0	0	-1	-1	0	0	0	0	0	0	0	0	0	-1	0	Node equations			Node 1 - input-consumption	-1.92778	[V]
Node 2	-1	0	0	1	0	0	0	0	0	0	0	0	0	0	0				Node 2 - consumption	0.583333
Node 3	1	-1	0	0	-1	0	0	0	0	0	0	0	0	0	0				Node 3 - consumption	0.0472222
Node 4	0	1	1	0	0	0	0	0	0	0	0	-1	0	0	-1				Node 4 - consumption	0.025
Node 5	0	0	0	0	0	0	0	0	0	0	-1	1	1	0	0				Node 5 - consumption	0.0555556
Node 6	0	0	0	0	0	0	0	0	0	0	0	0	-1	1	0				Node 6 - consumption	0.694444
Node 7	0	0	0	0	1	-1	-1	0	0	0	0	0	0	0	0				Node 7 - consumption	0.0833333
Node 8	0	0	0	0	0	0	1	-1	0	0	0	0	0	0	0				Node 8 - consumption	0.0472222
Node 9	0	0	0	0	0	0	0	1	1	0	0	0	0	0	1				Node 9 - consumption	0.236111
Node 10	0	0	0	0	0	0	0	0	-1	1	0	0	0	0	0				Node 10 - consumption	0.0777778
Loop 1	1.66817e+07	2.4557e+07	-9.72307e+08	1.51167e+08	0	0	0	0	0	0	0	0	0	0	0	Loop equations			-A₁+(A₂·A₃+A₄·A₅+A₆·A₇+A₈·A₉)	5.96046e-08
Loop 2	0	-2.4557e+07	0	0	1.18261e+09	9.7853e+06	0	0	0	0	-1.08288e+09	-5.28533e+08	0	0	0				-B₁+(B₂·B₃+B₄·B₅+B₆·B₇+B₈·B₉+B10·B11)	-1.08499e-07
Loop 3	0	0	0	0	0	-9.7853e+06	6.65085e+08	3.80907e+08	-9.59162e+06	-7.44177e+08	0	0	0	0	0				-C₁+(C₂·C₃+C₄·C₅+C₆·C₇+C₈·C₉+C10·C11)	1.45374e-08
Loop 4	0	0	9.72307e+08	0	0	0	0	0	0	0	0	5.28533e+08	-9.96192e+08	-3.53033e+07	0				-D₁+(D₂·D₃+D₄·D₅+D₆·D₇+D₈·D₉)	-7.45058e-08
Loop 5	0	0	0	0	0	0	0	0	-9.59162e+06	-7.44177e+08	-1.08288e+09	-5.28533e+08	0	0	1.98057e+09				-E₁+(E₂·E₃+E₄·E₅+E₆·E₇+E₈·E₉+E10·E11)	-1.56462e-07
inv [NL]	-0.673829	-0.870041	0.108307	0.0786602	-0.133272	-0.655329	0.00101482	0.0096499	0.0145954	0.0144097	1.29797e-09	9.07249e-11	-1.29834e-11	5.24053e-10	3.23466e-11
	-0.252996	-0.435493	-0.455632	0.50532	0.187798	-0.23791	-0.00287241	0.0565237	0.090541	0.0893889	1.20725e-09	-3.82849e-10	-8.93061e-11	4.27335e-10	2.09424e-10		final results	[Q]=inv[NL]x[V]
	-0.122713	-0.00572102	0.00718933	0.0263417	-0.0182635	-0.119138	0.000102641	0.00309344	0.00480634	0.00474518	-7.73922e-10	5.99244e-12	-4.49688e-12	1.0126e-10	1.08733e-11		result [Q]	Q (m3/s)	Q (m3/h)	sign	Pipe	velocity (m/s)
	-0.673829	0.129959	0.108307	0.0786602	-0.133272	-0.655329	0.00101482	0.0096499	0.0145954	0.0144097	1.29797e-09	9.07249e-11	-1.29834e-11	5.24053e-10	3.23466e-11			0.341164	1228.19	1	1	0.657516
	-0.420833	-0.434548	-0.436061	-0.42666	-0.32107	-0.417419	0.00388722	-0.0468738	-0.0759457	-0.0749793	9.07249e-11	4.73574e-10	7.63226e-11	9.67173e-11	-1.77077e-10			0.100778	362.8	1	2	0.345291
	-0.503694	-0.519371	-0.521101	-0.513893	-0.3859	-0.499662	-0.990893	-0.636107	-0.432913	-0.427405	1.03708e-10	3.97251e-10	-5.33445e-10	1.14198e-10	-4.08869e-11			0.152133	547.679	1	3	2.08499
	0.0828604	0.0848231	0.0850397	0.0872328	0.0648296	0.0822433	-0.00521992	0.589233	0.356968	0.352425	-1.29834e-11	7.63226e-11	6.09768e-10	-1.74803e-11	-1.3619e-10			0.924498	3328.19	1	4	3.16757
	0.0828604	0.0848231	0.0850397	0.0872328	0.0648296	0.0822433	-0.00521992	-0.410767	0.356968	0.352425	-1.29834e-11	7.63226e-11	6.09768e-10	-1.74803e-11	-1.3619e-10			0.193164	695.391	1	5	2.64732
	0.121523	0.12445	0.124773	0.127723	0.0949727	0.120614	0.00562001	0.320589	0.500978	-0.492672	-1.93632e-11	1.00755e-10	-4.73578e-10	-2.57396e-11	-1.88459e-10			0.0140909	50.7271	1	6	0.0482789
	0.121523	0.12445	0.124773	0.127723	0.0949727	0.120614	0.00562001	0.320589	0.500978	0.507328	-1.93632e-11	1.00755e-10	-4.73578e-10	-2.57396e-11	-1.88459e-10			0.0957401	344.664	1	7	1.31212
	-0.374783	-0.356179	-0.354126	-0.358385	-0.519128	-0.379723	-0.00348713	-0.0433043	-0.0661084	-0.0652671	-1.23072e-10	-2.96497e-10	5.98678e-11	-1.39937e-10	-1.47572e-10			0.0485178	174.664	1	8	0.664939
	-0.171325	-0.231941	-0.23863	-0.253383	0.329337	-0.15419	-0.00236967	-0.0305609	-0.0467066	-0.0461123	4.00981e-10	-1.99779e-10	4.23875e-11	4.85376e-10	-1.04352e-10			0.0320228	115.282	1	9	0.109718
	-0.203458	-0.124238	-0.115496	-0.105002	0.151535	-0.225533	-0.00111746	-0.0127433	-0.0194017	-0.0191548	-5.24053e-10	-9.67173e-11	1.74803e-11	-6.25313e-10	-4.32199e-11			0.109801	395.282	1	10	1.50482
	-0.203458	-0.124238	-0.115496	-0.105002	0.151535	0.774467	-0.00111746	-0.0127433	-0.0194017	-0.0191548	-5.24053e-10	-9.67173e-11	1.74803e-11	-6.25313e-10	-4.32199e-11			0.173487	624.555	1	11	2.37765
	-0.204383	-0.209273	-0.209813	-0.214956	-0.159802	-0.202858	-0.00040009	0.0901781	0.142054	0.140246	3.23466e-11	-1.77077e-10	-1.3619e-10	4.32199e-11	3.24649e-10			0.0723403	260.425	1	12	0.991427
																		0.156703	564.13	1	13	2.14762
																		0.851147	3064.13	1	14	1.64039
																		0.15557	560.054	1	15	2.1321
